# Supplementary material for: Dietary Polyunsaturated Fatty Acids Regulate Dendritic Cell Function via Nrf2-dependent Control of Ferroptosis
Source: Research Square preprint supplement (doi:10.21203/rs.3.rs-7983397/v1), 2025-11-19
Supplement: Supplementary file 1 [file 21d9733fd45837760145a897.pdf]

# Supplemental Figure 1

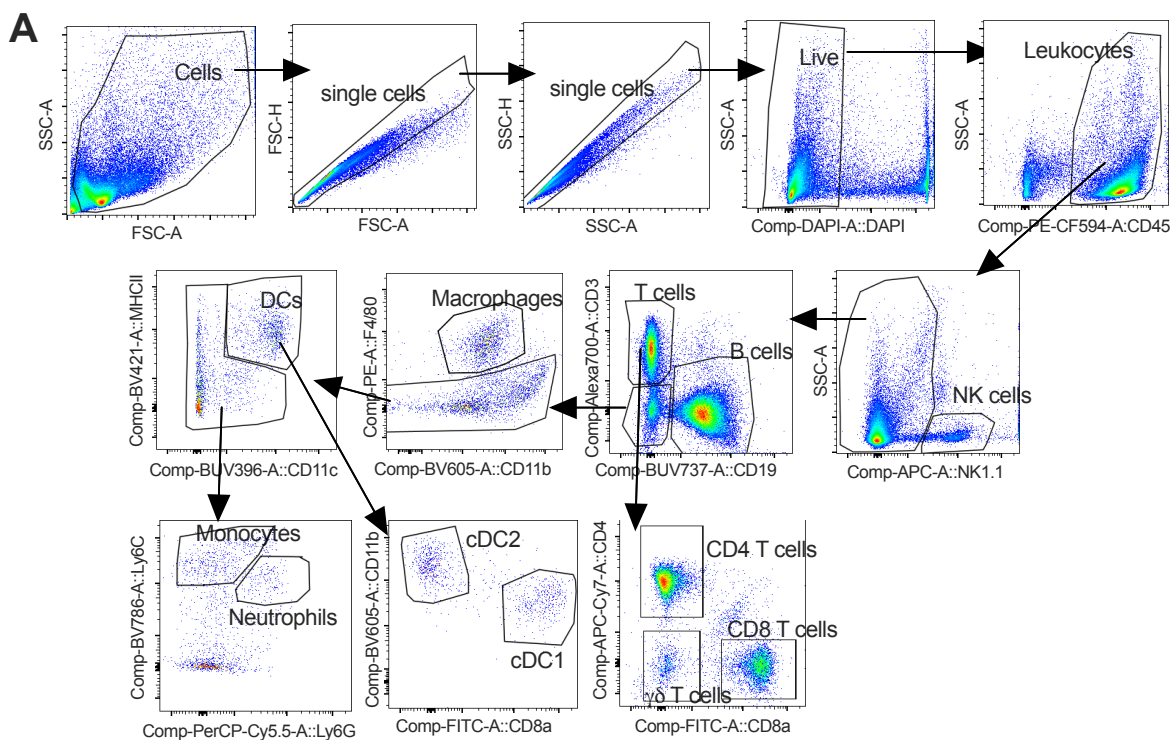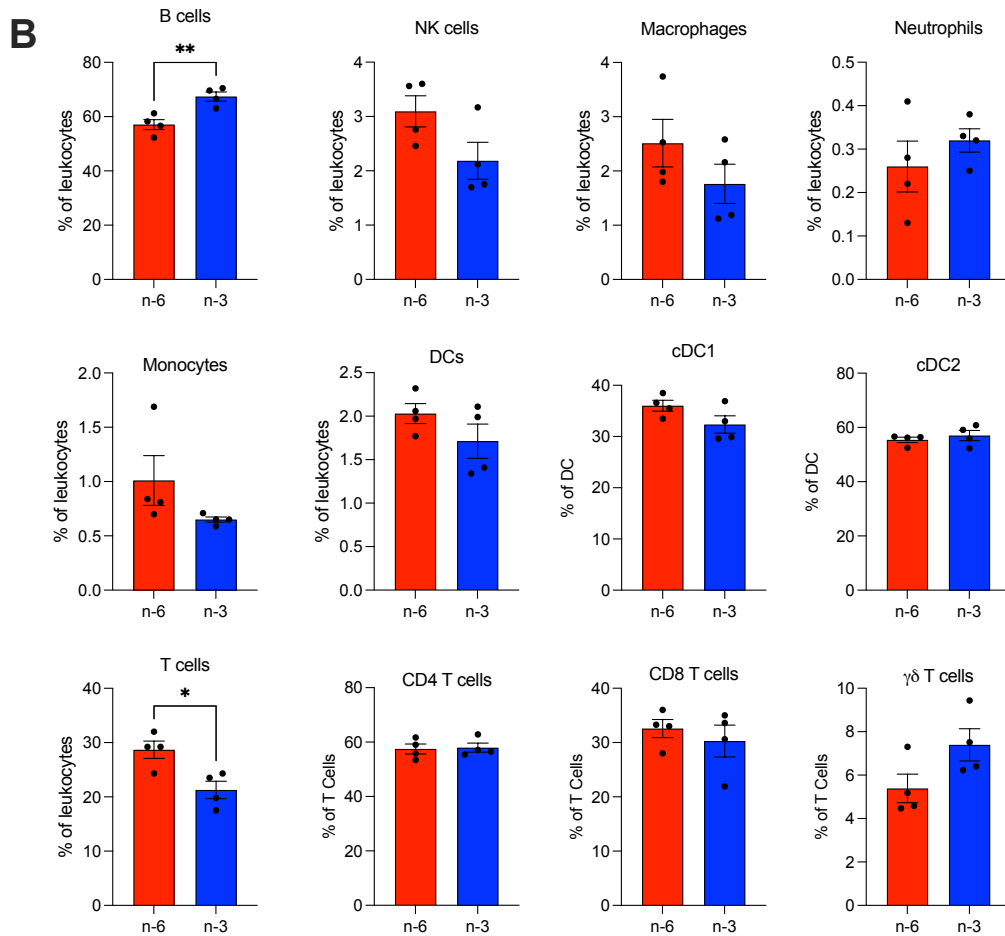

**Figure S1. Flow cytometry gating strategy and proportion of splenic immune cell subsets in mice under the different diets.** A) Representative gating workflow used to identify major splenic immune cell subsets. B) Mice were maintained on n-6 or n-3 PUFA-enriched diets for 9–10 weeks (n = 4 per group). Spleens were harvested, processed into single-cell suspensions, and stained for flow cytometric analysis of major immune cell populations. Bar graphs show the relative proportions of splenic immune subsets, including B cells, NK cells, macrophages, monocytes, neutrophils, dendritic cells, and T cells. Data are presented as mean  $\pm$  SEM. Statistical significance was assessed using an unpaired two-tailed Student's t-test. \* $P < 0.05$ , \*\* $P < 0.01$

## Supplemental Figure 2

**A**

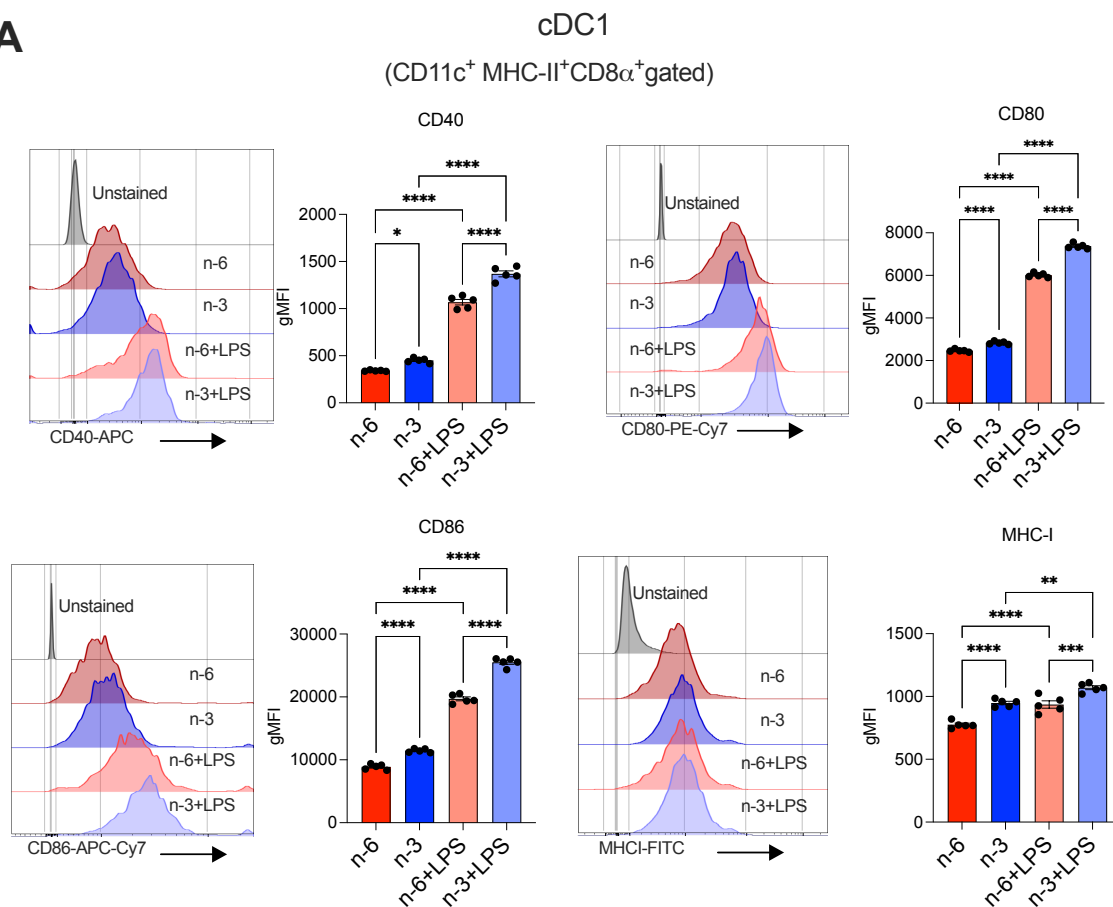

**B**

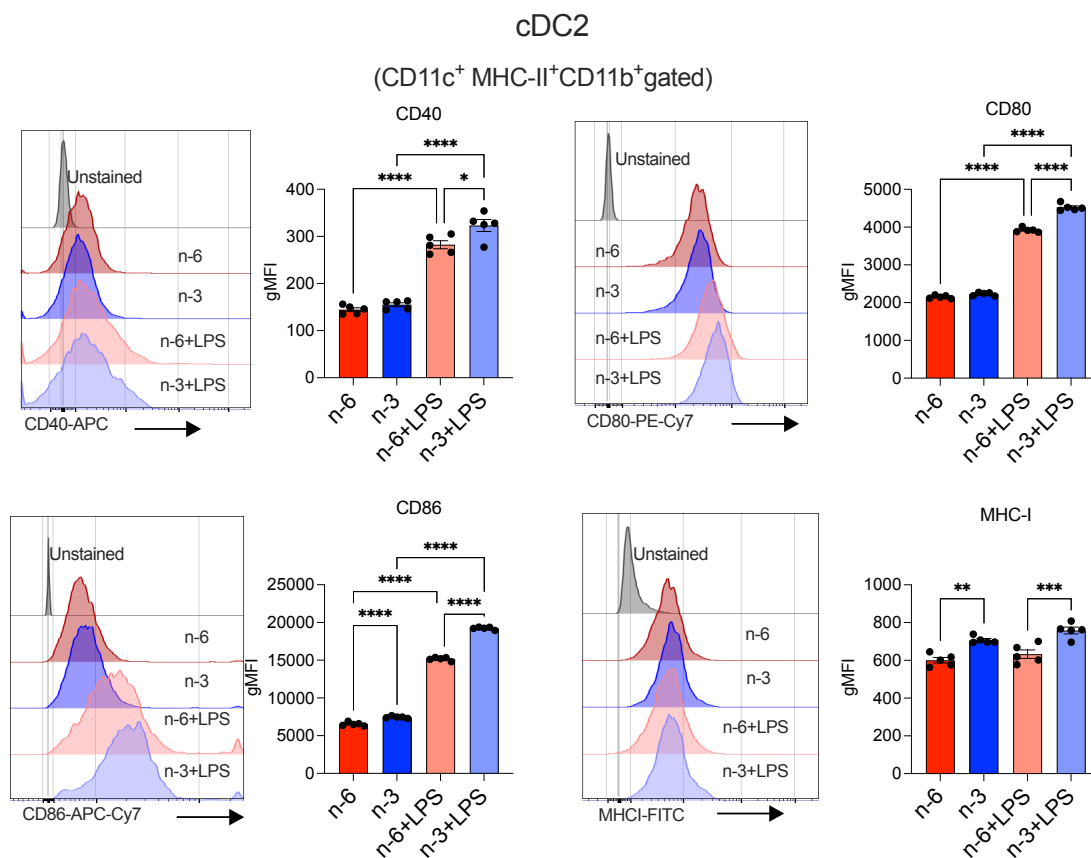

**Figure S2. Dietary PUFAs modulate co-stimulatory and MHC-I molecule expression in splenic DC subsets.** Mice were maintained on n-6 or n-3 PUFA-enriched diets for 9–10 weeks ( $n = 5$  per group). DCs were isolated from spleen and stimulated with LPS (100 ng/mL) or vehicle control for 6 hours. Cells were then stained for surface expression of CD40, CD80, CD86, and MHC class I. Representative histograms and bar graphs depict expression levels of the indicated markers on: (A) conventional type 1 DCs (cDC1; CD11c<sup>+</sup> MHC-II<sup>+</sup> CD8 $\alpha$ <sup>+</sup>) and (B) conventional type 2 DCs (cDC2; CD11c<sup>+</sup> MHC-II<sup>+</sup> CD11b<sup>+</sup>). Data are presented as mean  $\pm$  SEM and represent at least two independent experiments. Statistical significance was assessed using one-way ANOVA followed by Tukey's multiple comparisons test: \* $P < 0.05$ , \*\* $P < 0.01$ , \*\*\* $P < 0.001$ , \*\*\*\* $P < 0.0001$ .

## Supplemental Figure 3

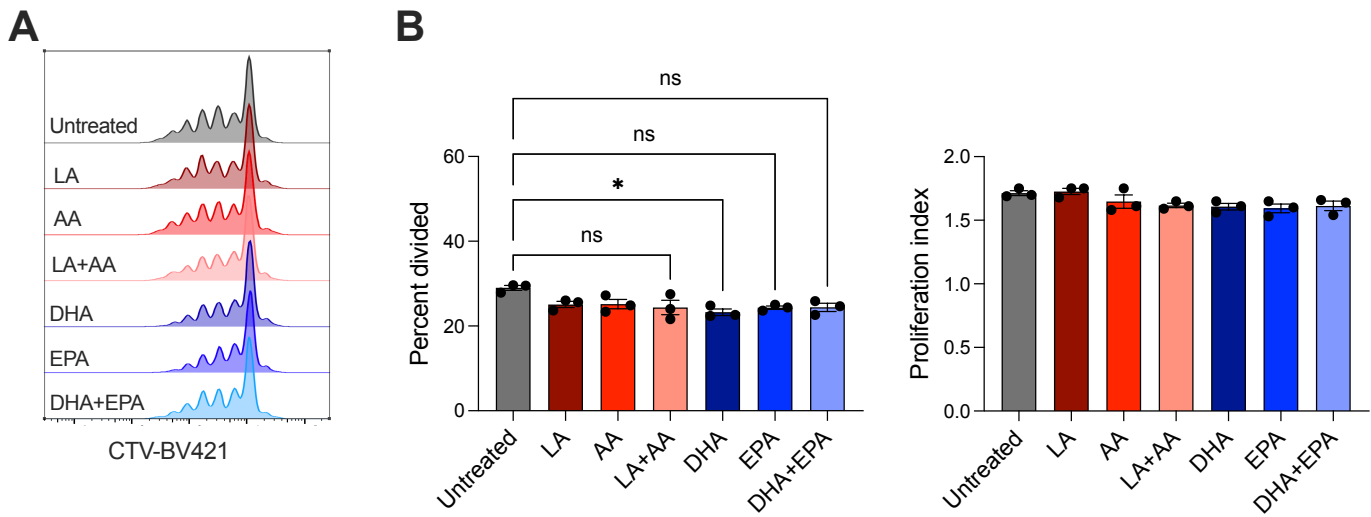

**Figure S3. Effects of ex vivo exposure to defined n-6 and n-3 fatty acids.** Splenic dendritic cells (spDCs) isolated from chow diet-fed mice were treated ex vivo with the indicated purified n-6 (linoleic acid (LA), Adrenic acid (AA) alone or in combination) or n-3 (eicosapentaenoic acid (EPA), docosahexaenoic acid (DHA) alone or in combination) as described in the Methods. (A) Representative flow cytometry histograms showing CTV dilution in proliferating CD8<sup>+</sup> T cells co-cultured with fatty acid-treated spDCs. (B) Quantification of T cell proliferation parameters, including percent divided and proliferation index. Data represent at least two independent experiments with comparable results and are presented as mean  $\pm$  SEM. Statistical significance was determined by one-way ANOVA followed by Tukey's multiple-comparisons test:  $P < 0.05$ .

Supplemental Figure 4

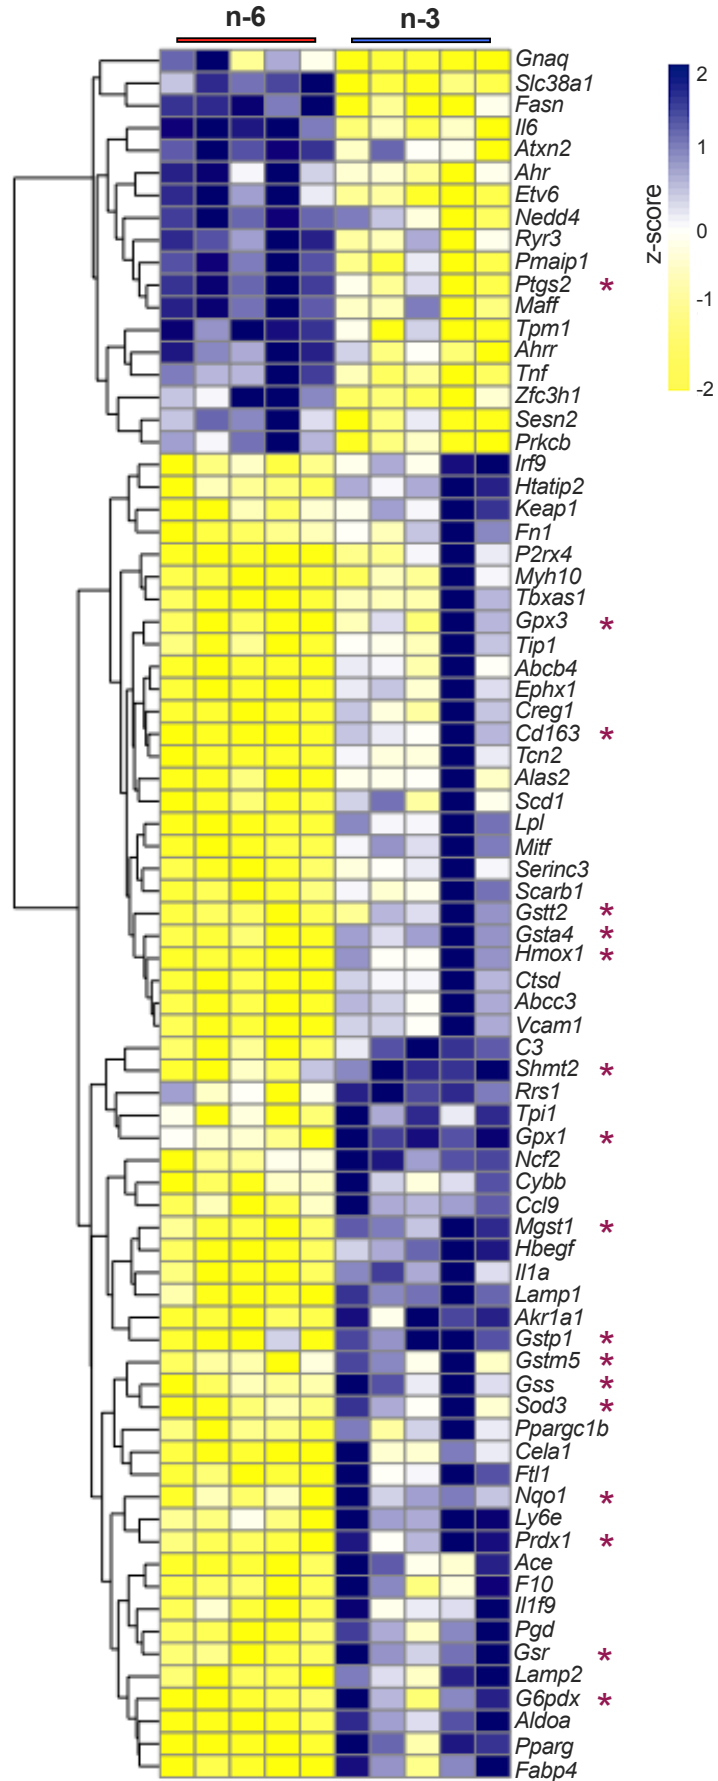

**Figure S4. Heat map of Nrf2-regulated genes differentially expressed in splenic DCs according to diet.**

Heat maps show expression profiles of Nrf2 target genes in spDCs isolated from mice fed n-3 versus n-6 PUFA-enriched diets (n = 5 per group). Genes marked with an asterisk represent those significantly upregulated in n-3-conditioned spDCs that are implicated in glutathione biosynthesis and cellular detoxification (***Gss***, ***Gsr***, ***Shmt2***, ***Mgst1***, ***Gstp1***, ***Gstm5***, ***Gstt2***, and ***Gsta4***), as well as canonical Nrf2 targets involved in redox homeostasis (***Nqo1***, ***Prdx1***, ***Sod3***, ***Gpx1***, and ***Gpx3***). Data reflect relative mRNA expression levels from RNA-seq analysis.

## Supplemental Figure 5

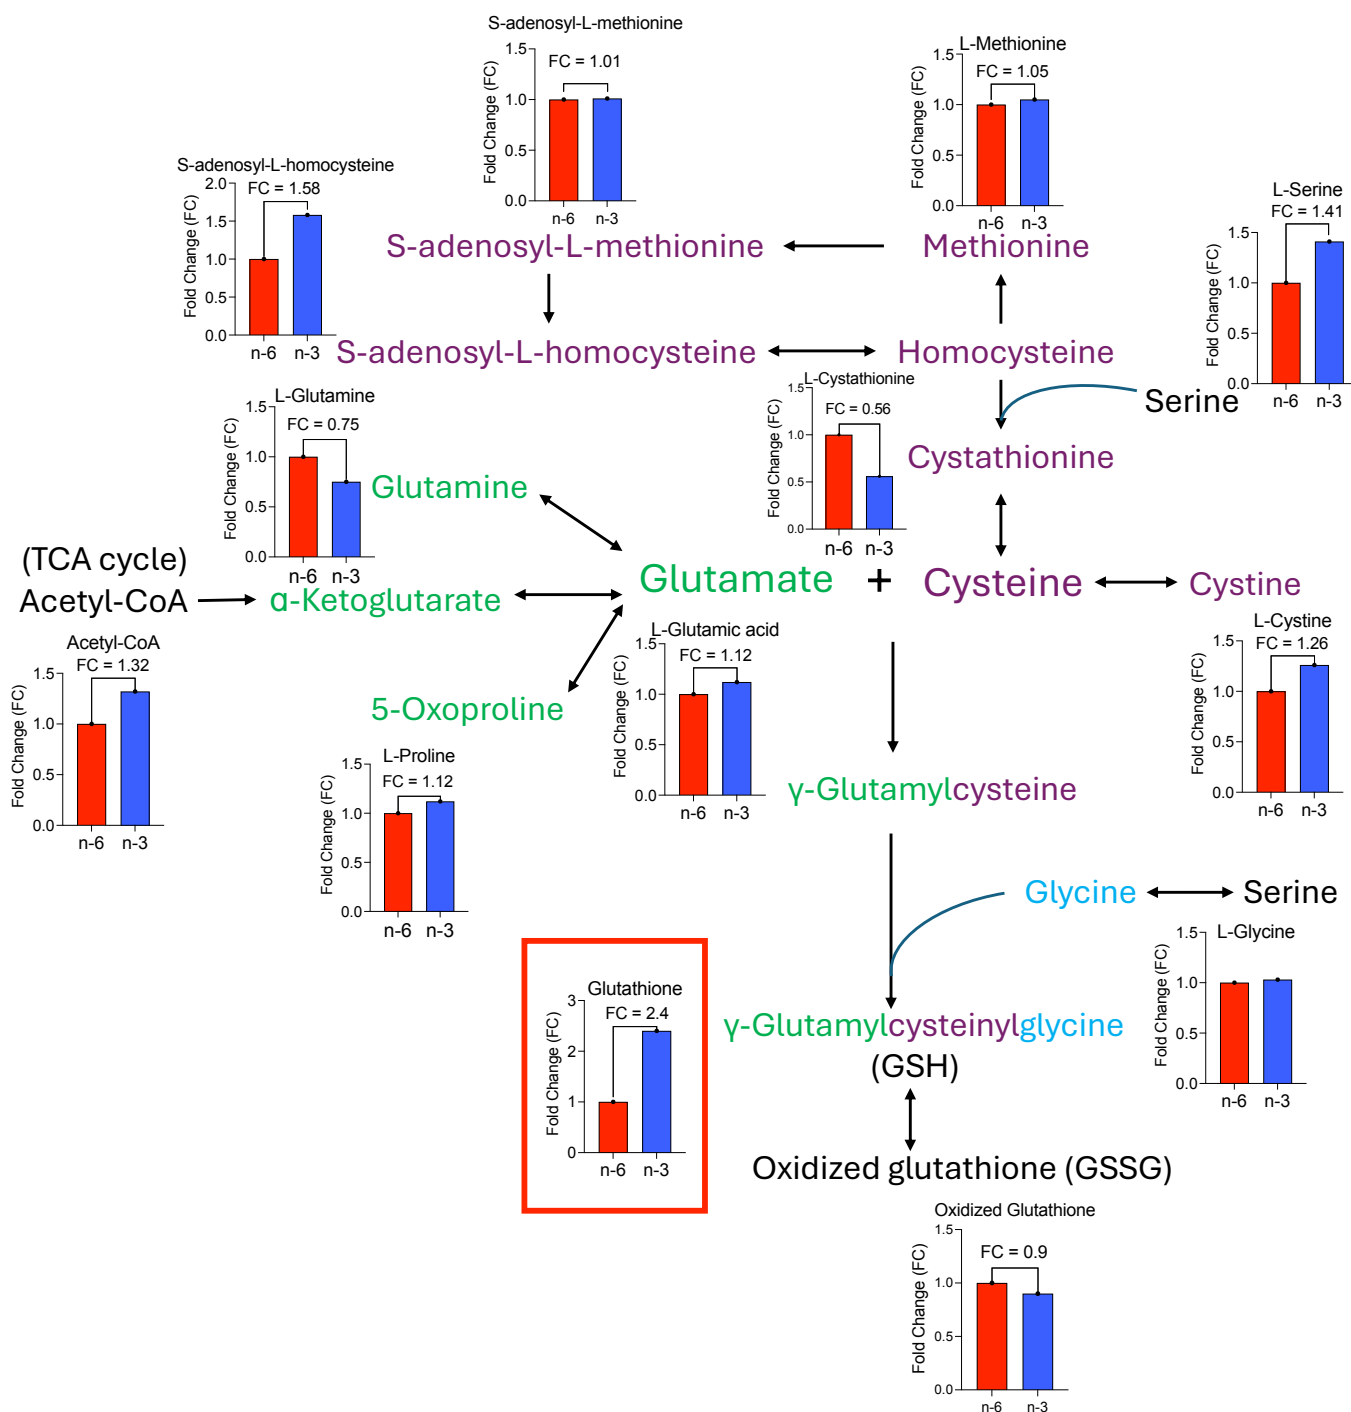

**Figure S5. Glutathione-related metabolites in splenic DCs isolated from mice under PUFA-enriched diets.** spDCs were isolated from mice fed n-3 (n = 7) or n-6 (n = 8) PUFA-enriched diets. Cells were pooled by group, and targeted polar metabolomic profiling was performed by LC–MS/MS. Bar graphs depict fold changes in the relative abundance of metabolites involved in glutathione biosynthesis and redox regulation, including L-methionine, S-adenosylmethionine, S-adenosylhomocysteine, L-serine, L-glutamine, L-cystathionine, L-cystine, L-proline, glycine, acetyl-CoA, reduced glutathione (GSH), and oxidized glutathione (GSSG). Metabolite levels were normalized to cell number prior to analysis.



## Supplemental Figure 6

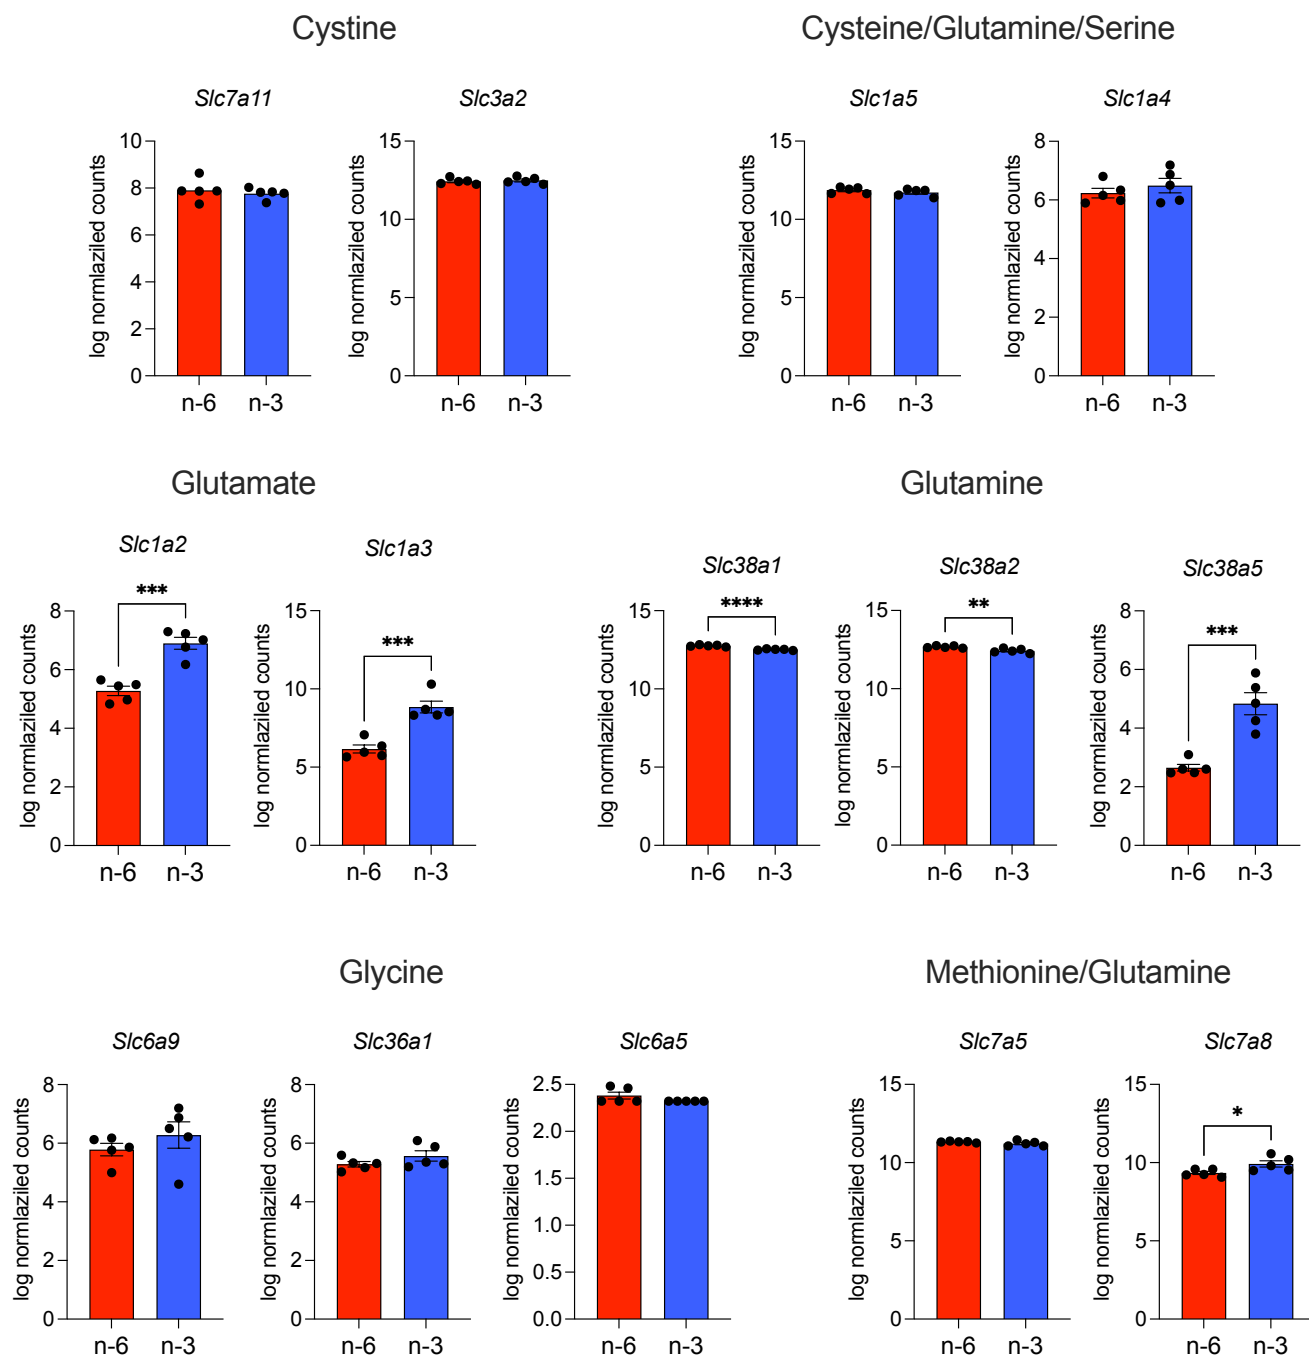

**Figure S6: Expression of glutathione-related amino acid transporters in splenic DCs from PUFA-fed mice:** RNA-seq data from spDCs isolated from mice receiving either an n-3 or n-6 PUFA-enriched diet (n = 5 per group) are presented as log-normalized counts for transporters associated with the uptake of cystine, cysteine/serine, glutamate, glutamine, glycine, and methionine/glutamine. Statistical significance was determined using unpaired two-tailed Student's *t*-test: \**P* < 0.05, \*\**P* < 0.01, \*\*\**P* < 0.001, \*\*\*\**P* < 0.0001.

# Supplemental Figure 7

A

| Category                                         | Function                               | FDR | N   | P          | Z      |
|--------------------------------------------------|----------------------------------------|-----|-----|------------|--------|
| Cell Death and Survival                          | Cell death of myeloid cells            | 0   | 27  | 3.25E-07   | -2.109 |
|                                                  | Apoptosis of myeloid cells             | 0   | 23  | 8.64E-07   | -2.528 |
|                                                  | Organismal death                       | 0   | 245 | 3.06E-33   | -5.554 |
| Lipid                                            | Accumulation                           | 0   | 38  | 1.69E-08   | -1.685 |
|                                                  | Metabolism                             | 0   | 52  | 2.55E-08   | 2.989  |
| Cell-To-Cell Signaling and Inflammatory Response | Migration of phagocytes                | 0   | 34  | 5.7E-09    | 2.033  |
|                                                  | Influx of phagocytes                   | 0   | 11  | 0.00000108 | 2.157  |
|                                                  | Interaction of leukocytes              | 0   | 43  | 4.28E-11   | 2.434  |
|                                                  | Activation of phagocytes               | 0   | 41  | 2.44E-09   | 2.435  |
|                                                  | Activation of antigen presenting cells | 0   | 38  | 1.4E-09    | 2.744  |
| Cellular Development                             | Maturation of cells                    | 0   | 39  | 0.00000129 | 2.158  |
|                                                  | Differentiation of progenitor cells    | 0   | 34  | 1.18E-08   | 2.154  |

B

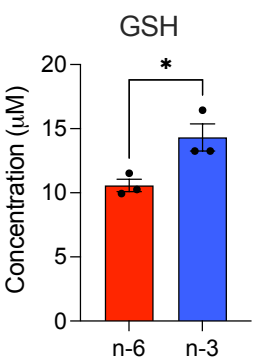

C

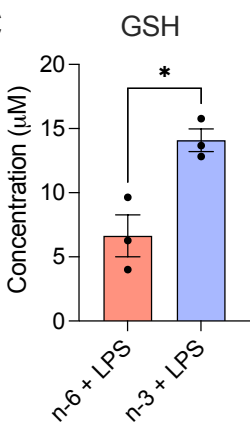

D

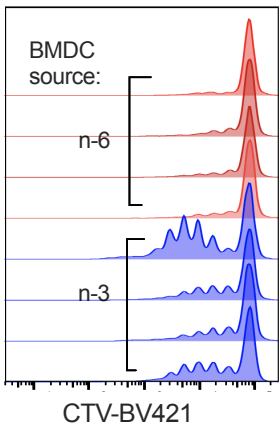

E

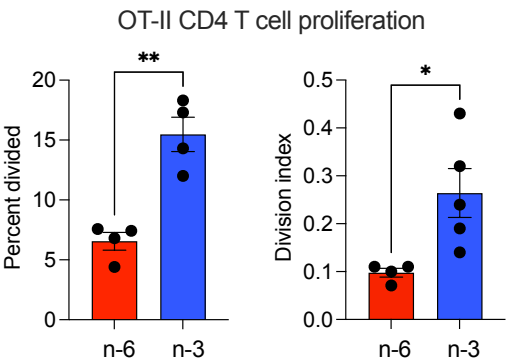

F

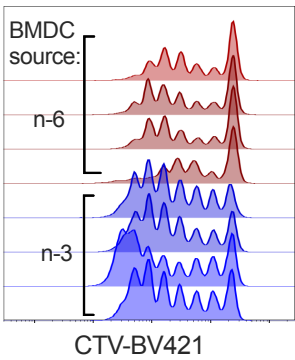

G

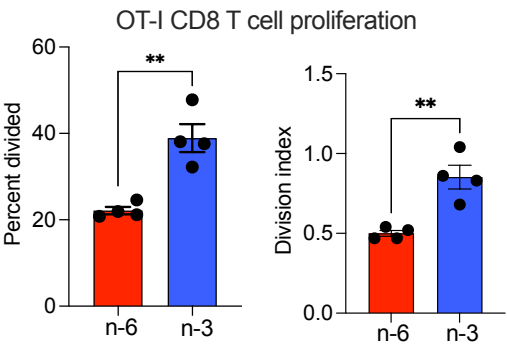

**Figure S7. Dietary PUFAs shape the transcriptomic and functional profile of bone marrow–derived dendritic cells (BMDCs).** Mice were maintained on n-6 or n-3 PUFA-enriched diets for 9–10 weeks. Bone marrow cells were isolated and differentiated with recombinant GM-CSF to generate BMDCs. CD11c<sup>+</sup>MHC-II<sup>+</sup> BMDCs were sorted and analyzed as follows: (A) Ingenuity Pathway Analysis (IPA) of RNA-seq data identifying top significantly altered biological processes in BMDCs from n-6 vs. n-3 diet–fed mice (n = 5 per group). (B–C) Total intracellular GSH levels quantified using a Glutathione Assay Kit in (B) untreated or (C) LPS-stimulated BMDCs from each dietary group (n = 3 per group). (D–G) BMDCs from indicated diets were pulsed with OVA and co-cultured with OT-II (CD4<sup>+</sup>) or OT-I (CD8<sup>+</sup>) T cells for 72 h. (D, F) Representative CTV dilution histograms. (E, G) Quantification of T cell proliferation shown as percent divided and division index for OT-II (E) and OT-I (G) T cells (n = 4 per group). (B–G) Data are representative of at least two independent experiments and are presented as mean ± SEM. Statistical significance was assessed using an unpaired two-tailed Student's t-test: \**P* < 0.05, \*\**P* < 0.01
