# Supplementary material for: Dietary Polyunsaturated Fatty Acids Regulate Dendritic Cell Function via Nrf2-dependent Control of Ferroptosis
Source: Research Square preprint supplement (doi:10.21203/rs.3.rs-7983397/v1), 2025-11-19
Supplement: Supplementary file 1 [file 3994b6f6a78ad9366d70ef0b.docx]

|  |  | **Diet** | |
| --- | --- | --- | --- |
| **Fatty Acid** |  | **n-6** | **n-3** |
| Myristic | C14:0 | 0.50% | 10.28% |
| Palmitic | C16:0 | 13.20% | 18.72% |
| Palmitelaidic | C16:1n7t | 0.01% | 0.46% |
| Palmitoleic | C16:1n7 | 0.12% | 13.43% |
| Stearic | C18:0 | 2.23% | 5.33% |
| Elaidic | C18:1t | 0.15% | 0.26% |
| Oleic | C18:1n9 | 28.41% | 12.23% |
| Linoelaidic | C18:2n6t | 0.33% | 0.44% |
| Linoleic | C18:2n6 | 53.09% | 3.18% |
| Arachidic | C20:0 | 0.37% | 0.54% |
| gamma-Linolenic | C18:3n6 | 0.02% | 0.35% |
| Eicosenoic | C20:1n9 | 0.24% | 0.80% |
| alpha-Linolenic | C18:3n3 | 0.99% | 1.21% |
| Eicosadienoic | C20:2n6 | 0.02% | 3.00% |
| Behenic | C22:0 | 0.12% | 0.16% |
| Dihomo-g-linolenic | C20:3n6 | 0.00% | 0.26% |
| Arachidonic | C20:4n6 | 0.01% | 1.02% |
| Lignoceric | C24:0 | 0.17% | 0.09% |
| Eicosapentaenoic | C20:5n3 | 0.00% | 15.14% |
| Nervonic | C24:1n9 | 0.02% | 0.29% |
| Docosatetraenoic | C22:4n6 | 0.00% | 0.18% |
| Docosapentaenoic - n6 | C22:5n6 | 0.00% | 0.39% |
| Docosapentaenoic - n3 | C22:5n3 | 0.00% | 2.24% |
| Docosahexaenoic | C22:6n3 | 0.00% | 10.01% |

**Supplemental Table 2** –Fatty acid composition of diets
