# Supplementary material for: Dietary Polyunsaturated Fatty Acids Regulate Dendritic Cell Function via Nrf2-dependent Control of Ferroptosis
Source: Research Square preprint supplement (doi:10.21203/rs.3.rs-7983397/v1), 2025-11-19
Supplement: Supplementary file 2 [file 883b62f0a5d9f7e9c2fdd8ac.xlsx]

## Sheet: Sheet1
		Filter		Total DEGs	1246
	p_value <	0.05		Upregulated	762
	FDR <	0.05		Downregulated	484
	|FC| >	1			Filter
Gene ID	Transcript ID	Description	Entrez ID	Gene Name	Sp.n-3 vs Sp.n-6
ENSMUSG00000094103	ENSMUST00000177978	RIKEN cDNA 1700047I17 gene 2	100101807	Fam177a2	-13.0644
ENSMUSG00000032487	ENSMUST00000035065,ENSMUST00000190784	prostaglandin-endoperoxide synthase 2	19225	Ptgs2	-4.15936
ENSMUSG00000090958	ENSMUST00000165205,ENSMUST00000205937,ENSMUST00000205956	leucine rich repeat containing 32	434215	Lrrc32	-2.79492
ENSMUSG00000095348	ENSMUST00000107991,ENSMUST00000178043	predicted gene 3892	665845	Gm3892	-2.61104
ENSMUSG00000027358	ENSMUST00000028836	bone morphogenetic protein 2	12156	Bmp2	-2.60373
ENSMUSG00000003545	ENSMUST00000003640,ENSMUST00000207334,ENSMUST00000207716,ENSMUST00000208230,ENSMUST00000208326,ENSMUST00000208446,ENSMUST00000208505	FBJ osteosarcoma oncogene B	14282	Fosb	-2.52481
ENSMUSG00000037868	ENSMUST00000048289,ENSMUST00000105438,ENSMUST00000127820,ENSMUST00000130933,ENSMUST00000145754,ENSMUST00000145936,ENSMUST00000146986	early growth response 2	13654	Egr2	-2.47217
ENSMUSG00000028341	ENSMUST00000030025,ENSMUST00000133539,ENSMUST00000153369,ENSMUST00000154186	nuclear receptor subfamily 4, group A, member 3	18124	Nr4a3	-2.44518
ENSMUSG00000035860	ENSMUST00000095774,ENSMUST00000219065,ENSMUST00000219158,ENSMUST00000219453	cadherin-related family member 3	68764	Cdhr3	-2.42353
ENSMUSG00000057378	ENSMUST00000080673,ENSMUST00000091818,ENSMUST00000128192,ENSMUST00000134358,ENSMUST00000142537,ENSMUST00000146187,ENSMUST00000156757,ENSMUST00000207603,ENSMUST00000208135,ENSMUST00000208151,ENSMUST00000208290,ENSMUST00000208574	ryanodine receptor 3	20192	Ryr3	-2.31045
ENSMUSG00000000266	ENSMUST00000112988,ENSMUST00000112990,ENSMUST00000112993,ENSMUST00000128809,ENSMUST00000140144	midline 2	23947	Mid2	-2.27364
ENSMUSG00000038418	ENSMUST00000064795,ENSMUST00000165033	early growth response 1	13653	Egr1	-2.21785
ENSMUSG00000038009	ENSMUST00000061295,ENSMUST00000146173	DnaJ heat shock protein family (Hsp40) member C22	72778	Dnajc22	-2.21433
ENSMUSG00000023034	ENSMUST00000023779,ENSMUST00000228985,ENSMUST00000230814,ENSMUST00000231153	nuclear receptor subfamily 4, group A, member 1	15370	Nr4a1	-2.17756
ENSMUSG00000028360	ENSMUST00000089948,ENSMUST00000128362,ENSMUST00000144677,ENSMUST00000239250	solute carrier family 44, member 5	242259	Slc44a5	-2.14346
ENSMUSG00000043953	ENSMUST00000111888,ENSMUST00000195968,ENSMUST00000199839	chemokine (C-C motif) receptor-like 2	54199	Ccrl2	-2.10371
ENSMUSG00000100901	ENSMUST00000188150	predicted gene, 18829	NA	Gm18829	-2.0893
ENSMUSG00000072940	ENSMUST00000119024	predicted pseudogene 10443	NA	Gm10443	-2.0605
ENSMUSG00000102975	ENSMUST00000193969	predicted gene, 37347	NA	Gm37347	-2.03328
ENSMUSG00000038354	ENSMUST00000048427,ENSMUST00000122960,ENSMUST00000130429	ankyrin repeat domain 35	213121	Ankrd35	-2.00863
ENSMUSG00000040435	ENSMUST00000042105,ENSMUST00000167273,ENSMUST00000211212	protein phosphatase 1, regulatory subunit 15A	17872	Ppp1r15a	-2.0008
ENSMUSG00000034765	ENSMUST00000038287	dual specificity phosphatase 5	240672	Dusp5	-1.99187
ENSMUSG00000024401	ENSMUST00000025263,ENSMUST00000167924	tumor necrosis factor	21926	Tnf	-1.97683
ENSMUSG00000037944	ENSMUST00000103134	chemokine (C-C motif) receptor 7	12775	Ccr7	-1.97132
ENSMUSG00000062464	ENSMUST00000077639,ENSMUST00000235101	cytochrome P450, family 4, subfamily f, polypeptide 37	677156	Cyp4f37	-1.94733
ENSMUSG00000026358	ENSMUST00000167317,ENSMUST00000167812,ENSMUST00000169042,ENSMUST00000169409,ENSMUST00000170870,ENSMUST00000172388,ENSMUST00000185714,ENSMUST00000189061,ENSMUST00000189916	regulator of G-protein signaling 1	50778	Rgs1	-1.94691
ENSMUSG00000024521	ENSMUST00000025399,ENSMUST00000236933,ENSMUST00000237161	phorbol-12-myristate-13-acetate-induced protein 1	58801	Pmaip1	-1.93677
ENSMUSG00000044786	ENSMUST00000051241,ENSMUST00000209061	zinc finger protein 36	22695	Zfp36	-1.92332
ENSMUSG00000036931	ENSMUST00000046177,ENSMUST00000108175,ENSMUST00000108176,ENSMUST00000153042	nuclear factor of kappa light polypeptide gene enhancer in B cells inhibitor, delta	243910	Nfkbid	-1.91788
ENSMUSG00000074570	ENSMUST00000099061,ENSMUST00000103073,ENSMUST00000109136,ENSMUST00000228775	Cas scaffolding protein family member 4	320664	Cass4	-1.90377
ENSMUSG00000102323	ENSMUST00000193136	predicted gene, 37790	NA	Gm37790	-1.8964
ENSMUSG00000003541	ENSMUST00000003635	immediate early response 3	15937	Ier3	-1.89138
ENSMUSG00000032515	ENSMUST00000035101,ENSMUST00000213936,ENSMUST00000214058,ENSMUST00000215916,ENSMUST00000216929	cysteine-serine-rich nuclear protein 1	215418	Csrnp1	-1.8816
ENSMUSG00000005864	ENSMUST00000006020,ENSMUST00000145642	cyclic nucleotide gated channel alpha 2	12789	Cnga2	-1.8703
ENSMUSG00000018417	ENSMUST00000018561,ENSMUST00000046390,ENSMUST00000114537,ENSMUST00000114541,ENSMUST00000123299,ENSMUST00000126657,ENSMUST00000126952,ENSMUST00000135125,ENSMUST00000136273,ENSMUST00000136701,ENSMUST00000140731,ENSMUST00000140930,ENSMUST00000144694,ENSMUST00000145367,ENSMUST00000151525	myosin IB	17912	Myo1b	-1.84649
ENSMUSG00000042622	ENSMUST00000096350,ENSMUST00000163691,ENSMUST00000229130,ENSMUST00000229285	v-maf musculoaponeurotic fibrosarcoma oncogene family, protein F (avian)	17133	Maff	-1.83809
ENSMUSG00000029189	ENSMUST00000031090,ENSMUST00000196435,ENSMUST00000196516,ENSMUST00000196550,ENSMUST00000199919	sel-1 suppressor of lin-12-like 3 (C. elegans)	231238	Sel1l3	-1.83675
ENSMUSG00000090582	ENSMUST00000165676	predicted gene 17024	NA	Gm17024	-1.83517
ENSMUSG00000030103	ENSMUST00000032194,ENSMUST00000163617,ENSMUST00000166346,ENSMUST00000204550	basic helix-loop-helix family, member e40	20893	Bhlhe40	-1.83515
ENSMUSG00000052837	ENSMUST00000064922	jun B proto-oncogene	16477	Junb	-1.82143
ENSMUSG00000025746	ENSMUST00000026845,ENSMUST00000195978,ENSMUST00000199183,ENSMUST00000199765	interleukin 6	16193	Il6	-1.81954
ENSMUSG00000108042	ENSMUST00000205226	RIKEN cDNA B130021K23 gene	NA	B130021K23Rik	-1.80836
ENSMUSG00000028698	ENSMUST00000030464,ENSMUST00000106490,ENSMUST00000147292	phosphoinositide-3-kinase regulatory subunit 3	18710	Pik3r3	-1.80799
ENSMUSG00000032313	ENSMUST00000034862,ENSMUST00000085754,ENSMUST00000130465	transmembrane protein 266	244886	Tmem266	-1.80481
ENSMUSG00000033450	ENSMUST00000036370,ENSMUST00000226153	T cell activation Rho GTPase activating protein	72536	Tagap	-1.80299
ENSMUSG00000104435	ENSMUST00000193794	predicted gene, 37422	NA	Gm37422	-1.80252
ENSMUSG00000079563	ENSMUST00000114455,ENSMUST00000170392,ENSMUST00000235892,ENSMUST00000236386,ENSMUST00000236703,ENSMUST00000237082,ENSMUST00000237130,ENSMUST00000237165	peptidoglycan recognition protein 2	57757	Pglyrp2	-1.799
ENSMUSG00000103165	ENSMUST00000194289	predicted gene, 37560	NA	Gm37560	-1.79092
ENSMUSG00000048621	ENSMUST00000060013,ENSMUST00000139259	predicted gene 6377	622976	Gm6377	-1.78375
ENSMUSG00000004267	ENSMUST00000004378,ENSMUST00000112476,ENSMUST00000125436,ENSMUST00000127274,ENSMUST00000128598,ENSMUST00000128701,ENSMUST00000135626,ENSMUST00000138770,ENSMUST00000139763,ENSMUST00000146712,ENSMUST00000147004,ENSMUST00000147307,ENSMUST00000149652,ENSMUST00000151214,ENSMUST00000156033,ENSMUST00000204896	enolase 2, gamma neuronal	13807	Eno2	-1.76661
ENSMUSG00000067341	ENSMUST00000050325	histocompatibility 2, class II antigen E beta2	381091	H2-Eb2	-1.76341
ENSMUSG00000028031	ENSMUST00000029665	dickkopf WNT signaling pathway inhibitor 2	56811	Dkk2	-1.75099
ENSMUSG00000024190	ENSMUST00000011196,ENSMUST00000025025,ENSMUST00000126178,ENSMUST00000146077,ENSMUST00000235532,ENSMUST00000236661	dual specificity phosphatase 1	19252	Dusp1	-1.73266
ENSMUSG00000079164	ENSMUST00000110997,ENSMUST00000191820,ENSMUST00000193539,ENSMUST00000193687,ENSMUST00000195614	toll-like receptor 5	53791	Tlr5	-1.73227
ENSMUSG00000015396	ENSMUST00000015540,ENSMUST00000221359	CD83 antigen	12522	Cd83	-1.73105
ENSMUSG00000049897	ENSMUST00000055406,ENSMUST00000153771	serine/threonine kinase-like domain containing 1	279029	Stkld1	-1.7282
ENSMUSG00000062638	ENSMUST00000080254,ENSMUST00000236230	butyrophilin-like 1	100038862	Btnl1	-1.71882
ENSMUSG00000020423	ENSMUST00000020692	B cell translocation gene 2, anti-proliferative	12227	Btg2	-1.71591
ENSMUSG00000118123	ENSMUST00000237966	NA	NA	Gm50346	-1.71205
ENSMUSG00000066191	ENSMUST00000084616,ENSMUST00000107747,ENSMUST00000152479,ENSMUST00000154664,ENSMUST00000229609	ankyrin repeat and sterile alpha motif domain containing 6	75691	Anks6	-1.70464
ENSMUSG00000042216	ENSMUST00000048112,ENSMUST00000057209,ENSMUST00000112324,ENSMUST00000112325,ENSMUST00000138266,ENSMUST00000140981,ENSMUST00000145708,ENSMUST00000147856,ENSMUST00000154248,ENSMUST00000156340	small G protein signaling modulator 1	52850	Sgsm1	-1.70318
ENSMUSG00000080917	ENSMUST00000120641	predicted gene 15925	NA	Gm15925	-1.69716
ENSMUSG00000040584	ENSMUST00000047753,ENSMUST00000126846,ENSMUST00000138138,ENSMUST00000145232	ATP-binding cassette, sub-family B (MDR/TAP), member 1A	18671	Abcb1a	-1.68553
ENSMUSG00000040016	ENSMUST00000041175,ENSMUST00000173533,ENSMUST00000196682	prostaglandin E receptor 3 (subtype EP3)	19218	Ptger3	-1.67313
ENSMUSG00000021575	ENSMUST00000022059,ENSMUST00000109640,ENSMUST00000123058,ENSMUST00000137538,ENSMUST00000148438,ENSMUST00000222032,ENSMUST00000222649	aryl-hydrocarbon receptor repressor	11624	Ahrr	-1.6614
ENSMUSG00000113303	ENSMUST00000221909	RIKEN cDNA 4930423D22 gene	NA	4930423D22Rik	-1.65328
ENSMUSG00000021701	ENSMUST00000022212,ENSMUST00000223756,ENSMUST00000224489,ENSMUST00000225156,ENSMUST00000225340	polo like kinase 2	20620	Plk2	-1.65115
ENSMUSG00000019850	ENSMUST00000019997,ENSMUST00000105527,ENSMUST00000122863,ENSMUST00000146388,ENSMUST00000154590,ENSMUST00000154749	tumor necrosis factor, alpha-induced protein 3	21929	Tnfaip3	-1.64787
ENSMUSG00000003418	ENSMUST00000003509,ENSMUST00000150781	ST8 alpha-N-acetyl-neuraminide alpha-2,8-sialyltransferase 6	241230	St8sia6	-1.64605
ENSMUSG00000035498	ENSMUST00000039229,ENSMUST00000140915,ENSMUST00000148158	CUB domain containing protein 1	109332	Cdcp1	-1.63465
ENSMUSG00000113388	ENSMUST00000221482	predicted gene, 48111	NA	Gm48111	-1.62815
ENSMUSG00000086894	ENSMUST00000156467,ENSMUST00000198873	predicted gene 15708	100504231	Gm15708	-1.62082
ENSMUSG00000030643	ENSMUST00000032879,ENSMUST00000107179,ENSMUST00000107180,ENSMUST00000208470,ENSMUST00000208945	RAB30, member RAS oncogene family	75985	Rab30	-1.61581
ENSMUSG00000030283	ENSMUST00000032421,ENSMUST00000147058,ENSMUST00000205149	ST8 alpha-N-acetyl-neuraminide alpha-2,8-sialyltransferase 1	20449	St8sia1	-1.61574
ENSMUSG00000039942	ENSMUST00000047379,ENSMUST00000120563,ENSMUST00000133966	prostaglandin E receptor 4 (subtype EP4)	19219	Ptger4	-1.61571
ENSMUSG00000118183	ENSMUST00000237803	NA	NA	Gm50345	-1.61122
ENSMUSG00000026080	ENSMUST00000027249,ENSMUST00000192175,ENSMUST00000192948,ENSMUST00000193435,ENSMUST00000193441,ENSMUST00000194361,ENSMUST00000194657,ENSMUST00000195731	carbohydrate sulfotransferase 10	98388	Chst10	-1.60354
ENSMUSG00000003382	ENSMUST00000117293,ENSMUST00000119109,ENSMUST00000136680,ENSMUST00000152010,ENSMUST00000170036	ets variant 3	27049	Etv3	-1.60091
ENSMUSG00000062175	ENSMUST00000073352,ENSMUST00000081335,ENSMUST00000150078,ENSMUST00000175634,ENSMUST00000176281	TGFB-induced factor homeobox 2	228839	Tgif2	-1.59999
ENSMUSG00000021127	ENSMUST00000021552,ENSMUST00000165114,ENSMUST00000218835,ENSMUST00000219642	zinc finger protein 36, C3H type-like 1	12192	Zfp36l1	-1.59343
ENSMUSG00000036062	ENSMUST00000069184,ENSMUST00000107975,ENSMUST00000107976,ENSMUST00000124380,ENSMUST00000131234,ENSMUST00000132173,ENSMUST00000138425,ENSMUST00000139100,ENSMUST00000151824	PHD finger protein 24	230085	Phf24	-1.58736
ENSMUSG00000050640	ENSMUST00000063192,ENSMUST00000124145,ENSMUST00000139520,ENSMUST00000146731,ENSMUST00000165548	transmembrane protein 150C	231503	Tmem150c	-1.58422
ENSMUSG00000051166	ENSMUST00000065716,ENSMUST00000220676,ENSMUST00000220848,ENSMUST00000221107,ENSMUST00000221511,ENSMUST00000222097,ENSMUST00000222128,ENSMUST00000222593,ENSMUST00000222717,ENSMUST00000223282	echinoderm microtubule associated protein like 5	319670	Eml5	-1.5837
ENSMUSG00000034684	ENSMUST00000080560,ENSMUST00000192157,ENSMUST00000192712,ENSMUST00000192727,ENSMUST00000192783,ENSMUST00000193108,ENSMUST00000193665,ENSMUST00000194039,ENSMUST00000194424,ENSMUST00000194846,ENSMUST00000195023,ENSMUST00000195267	sema domain, immunoglobulin domain (Ig), short basic domain, secreted, (semaphorin) 3F	20350	Sema3f	-1.58311
ENSMUSG00000003153	ENSMUST00000032476,ENSMUST00000165884,ENSMUST00000166135,ENSMUST00000168704,ENSMUST00000168801,ENSMUST00000169979,ENSMUST00000170724,ENSMUST00000171541	solute carrier family 2 (facilitated glucose transporter), member 3	20527	Slc2a3	-1.58298
ENSMUSG00000053137	ENSMUST00000088823,ENSMUST00000228967,ENSMUST00000230634,ENSMUST00000230734	mitogen-activated protein kinase 11	19094	Mapk11	-1.57834
ENSMUSG00000105008	ENSMUST00000196219	predicted gene 43652	NA	Gm43652	-1.56986
ENSMUSG00000020019	ENSMUST00000020204,ENSMUST00000147080	netrin 4	57764	Ntn4	-1.55931
ENSMUSG00000021087	ENSMUST00000021497,ENSMUST00000078505,ENSMUST00000137990,ENSMUST00000144181,ENSMUST00000150156,ENSMUST00000221756	reticulon 1	104001	Rtn1	-1.54071
ENSMUSG00000026414	ENSMUST00000027671,ENSMUST00000112085,ENSMUST00000112086,ENSMUST00000112087,ENSMUST00000178204,ENSMUST00000178854,ENSMUST00000179863,ENSMUST00000186225,ENSMUST00000188028,ENSMUST00000188098,ENSMUST00000189355,ENSMUST00000189732,ENSMUST00000189826,ENSMUST00000190451,ENSMUST00000191055	troponin T2, cardiac	21956	Tnnt2	-1.53666
ENSMUSG00000046761	ENSMUST00000060807,ENSMUST00000170153,ENSMUST00000238313	family with sequence similarity 83, member H	105732	Fam83h	-1.53442
ENSMUSG00000033083	ENSMUST00000100340,ENSMUST00000159484,ENSMUST00000159664,ENSMUST00000159668,ENSMUST00000159951,ENSMUST00000160297,ENSMUST00000160473,ENSMUST00000161304,ENSMUST00000161991,ENSMUST00000162617	TBC1 domain family, member 4	210789	Tbc1d4	-1.53323
ENSMUSG00000051212	ENSMUST00000049872,ENSMUST00000227267	G protein-coupled receptor 183	321019	Gpr183	-1.52853
ENSMUSG00000028327	ENSMUST00000030011,ENSMUST00000107782,ENSMUST00000107783,ENSMUST00000128947,ENSMUST00000165478	STRA6-like	74152	Stra6l	-1.5272
ENSMUSG00000091050	ENSMUST00000163781	RIKEN cDNA 9330020H09 gene	NA	9330020H09Rik	-1.5269
ENSMUSG00000099322	ENSMUST00000183434	predicted gene, 28017	NA	Gm28017	-1.52467
ENSMUSG00000040899	ENSMUST00000097418,ENSMUST00000164411,ENSMUST00000166348,ENSMUST00000167956,ENSMUST00000177568,ENSMUST00000180103,ENSMUST00000231340,ENSMUST00000231545,ENSMUST00000232412	chemokine (C-C motif) receptor 6	12458	Ccr6	-1.52152
ENSMUSG00000036478	ENSMUST00000038377,ENSMUST00000218953	B cell translocation gene 1, anti-proliferative	12226	Btg1	-1.52018
ENSMUSG00000024014	ENSMUST00000024811,ENSMUST00000234263,ENSMUST00000234270,ENSMUST00000234294,ENSMUST00000234478,ENSMUST00000234650,ENSMUST00000234665	proviral integration site 1	18712	Pim1	-1.51761
ENSMUSG00000025880	ENSMUST00000026999,ENSMUST00000168918,ENSMUST00000172718,ENSMUST00000174411,ENSMUST00000174843	SMAD family member 7	17131	Smad7	-1.51624
ENSMUSG00000019726	ENSMUST00000110559,ENSMUST00000220937,ENSMUST00000221483,ENSMUST00000221587,ENSMUST00000221717,ENSMUST00000223053,ENSMUST00000223527,ENSMUST00000231064	lysosomal trafficking regulator	17101	Lyst	-1.51463
ENSMUSG00000081404	ENSMUST00000121984	predicted gene 15694	NA	Gm15694	-1.50891
ENSMUSG00000089945	ENSMUST00000098066,ENSMUST00000126465,ENSMUST00000150412	paralemmin A kinase anchor protein	677884	Pakap	-1.50514
ENSMUSG00000075122	ENSMUST00000099816,ENSMUST00000231716,ENSMUST00000232409	CD80 antigen	12519	Cd80	-1.50372
ENSMUSG00000074420	ENSMUST00000144146,ENSMUST00000205904	predicted pseudogene 10693	NA	Gm10693	-1.49945
ENSMUSG00000040298	ENSMUST00000048453,ENSMUST00000207155,ENSMUST00000207219,ENSMUST00000208593	BTB (POZ) domain containing 16	330660	Btbd16	-1.48828
ENSMUSG00000025981	ENSMUST00000027125,ENSMUST00000087617,ENSMUST00000185474,ENSMUST00000185918	coenzyme Q10B	67876	Coq10b	-1.48742
ENSMUSG00000043932	ENSMUST00000050385	killer cell lectin-like receptor family I member 2	320407	Klri2	-1.48664
ENSMUSG00000029602	ENSMUST00000031606,ENSMUST00000125804,ENSMUST00000148695,ENSMUST00000154759,ENSMUST00000156722	RAS protein activator like 1 (GAP1 like)	19415	Rasal1	-1.48316
ENSMUSG00000056124	ENSMUST00000070080	UDP-Gal:betaGlcNAc beta 1,4-galactosyltransferase, polypeptide 6	56386	B4galt6	-1.48102
ENSMUSG00000051586	ENSMUST00000077159,ENSMUST00000098457,ENSMUST00000140854,ENSMUST00000142924,ENSMUST00000150503,ENSMUST00000151602,ENSMUST00000203095,ENSMUST00000203188,ENSMUST00000203254,ENSMUST00000204248,ENSMUST00000204302,ENSMUST00000204644,ENSMUST00000204994,ENSMUST00000205020,ENSMUST00000205030,ENSMUST00000207889,ENSMUST00000207968,ENSMUST00000207993,ENSMUST00000212208,ENSMUST00000212333,ENSMUST00000238920,…	microtubule associated monooxygenase, calponin and LIM domain containing 3	194401	Mical3	-1.48047
ENSMUSG00000035828	ENSMUST00000042818,ENSMUST00000229969	proviral integration site 3	223775	Pim3	-1.47699
ENSMUSG00000045045	ENSMUST00000053597,ENSMUST00000113822	leucine rich repeat and fibronectin type III domain containing 4	225875	Lrfn4	-1.47508
ENSMUSG00000000078	ENSMUST00000000080,ENSMUST00000221734,ENSMUST00000222857	Kruppel-like factor 6	23849	Klf6	-1.47486
ENSMUSG00000061577	ENSMUST00000074570,ENSMUST00000128308,ENSMUST00000142991,ENSMUST00000153448,ENSMUST00000166802	adhesion G protein-coupled receptor G5	382045	Adgrg5	-1.47164
ENSMUSG00000053560	ENSMUST00000060427	immediate early response 2	15936	Ier2	-1.46977
ENSMUSG00000061859	ENSMUST00000030290,ENSMUST00000041284,ENSMUST00000102792,ENSMUST00000107029,ENSMUST00000107030,ENSMUST00000107033,ENSMUST00000107034,ENSMUST00000134901,ENSMUST00000135606,ENSMUST00000136675,ENSMUST00000141796,ENSMUST00000141965,ENSMUST00000142103,ENSMUST00000238306	PATJ, crumbs cell polarity complex component	12695	Patj	-1.46652
ENSMUSG00000029102	ENSMUST00000030985,ENSMUST00000201038,ENSMUST00000201994,ENSMUST00000202126,ENSMUST00000202168,ENSMUST00000202573,ENSMUST00000202921	hepatocyte growth factor activator	54426	Hgfac	-1.4599
ENSMUSG00000038119	ENSMUST00000042842,ENSMUST00000119129,ENSMUST00000127264,ENSMUST00000137200,ENSMUST00000151682,ENSMUST00000154652	cell adhesion molecule-related/down-regulated by oncogenes	57810	Cdon	-1.45782
ENSMUSG00000001156	ENSMUST00000001184,ENSMUST00000203946,ENSMUST00000204437,ENSMUST00000205076	MAX dimerization protein 1	17119	Mxd1	-1.456
ENSMUSG00000025473	ENSMUST00000026546,ENSMUST00000106069,ENSMUST00000128332,ENSMUST00000132903,ENSMUST00000148670,ENSMUST00000149915,ENSMUST00000156647,ENSMUST00000173209	a disintegrin and metallopeptidase domain 8	11501	Adam8	-1.45517
ENSMUSG00000010051	ENSMUST00000010195,ENSMUST00000112387,ENSMUST00000123005,ENSMUST00000144392,ENSMUST00000184695	hyaluronoglucosaminidase 1	15586	Hyal1	-1.44898
ENSMUSG00000036661	ENSMUST00000043414,ENSMUST00000159322,ENSMUST00000160267,ENSMUST00000160727,ENSMUST00000162488,ENSMUST00000162824,ENSMUST00000173292	DENN/MADD domain containing 3	105841	Dennd3	-1.44764
ENSMUSG00000034640	ENSMUST00000047906,ENSMUST00000130705,ENSMUST00000154094	TCDD-inducible poly(ADP-ribose) polymerase	99929	Tiparp	-1.44621
ENSMUSG00000040669	ENSMUST00000079560,ENSMUST00000081849,ENSMUST00000112600,ENSMUST00000159252,ENSMUST00000159384,ENSMUST00000159657,ENSMUST00000160163,ENSMUST00000160696,ENSMUST00000160843,ENSMUST00000160863,ENSMUST00000161054,ENSMUST00000161149,ENSMUST00000161210,ENSMUST00000161290,ENSMUST00000161739,ENSMUST00000161877	polyhomeotic 1	13619	Phc1	-1.44162
ENSMUSG00000074785	ENSMUST00000099337,ENSMUST00000180514,ENSMUST00000180573,ENSMUST00000181244,ENSMUST00000218839	plexin C1	54712	Plxnc1	-1.43921
ENSMUSG00000029101	ENSMUST00000030984,ENSMUST00000087684,ENSMUST00000114280,ENSMUST00000114281,ENSMUST00000114283,ENSMUST00000114284,ENSMUST00000114285,ENSMUST00000128161,ENSMUST00000135403,ENSMUST00000141562,ENSMUST00000150139,ENSMUST00000153972,ENSMUST00000155162,ENSMUST00000156339,ENSMUST00000156819,ENSMUST00000201936,ENSMUST00000202915,ENSMUST00000225237	regulator of G-protein signaling 12	71729	Rgs12	-1.42828
ENSMUSG00000074419	ENSMUST00000094911,ENSMUST00000108619,ENSMUST00000108620,ENSMUST00000153846,ENSMUST00000189095	predicted gene 15448	100041146	Gm15448	-1.42755
ENSMUSG00000025964	ENSMUST00000087374,ENSMUST00000097717,ENSMUST00000114101,ENSMUST00000114103,ENSMUST00000114107,ENSMUST00000134704,ENSMUST00000141545,ENSMUST00000146403,ENSMUST00000182642,ENSMUST00000185616,ENSMUST00000187844,ENSMUST00000190658	a disintegrin and metallopeptidase domain 23	23792	Adam23	-1.42383
ENSMUSG00000031342	ENSMUST00000060210,ENSMUST00000112223,ENSMUST00000112224,ENSMUST00000112226,ENSMUST00000112227,ENSMUST00000112228,ENSMUST00000112229,ENSMUST00000112233,ENSMUST00000112235,ENSMUST00000123408,ENSMUST00000129731,ENSMUST00000143263	glycoprotein m6b	14758	Gpm6b	-1.42325
ENSMUSG00000056708	ENSMUST00000055322	immediate early response 5	15939	Ier5	-1.41937
ENSMUSG00000032558	ENSMUST00000035167,ENSMUST00000191919,ENSMUST00000192485,ENSMUST00000193439,ENSMUST00000193642,ENSMUST00000194183,ENSMUST00000194774,ENSMUST00000216593	nephronophthisis 3 (adolescent)	74025	Nphp3	-1.41929
ENSMUSG00000021356	ENSMUST00000021784,ENSMUST00000110307,ENSMUST00000222125	interferon regulatory factor 4	16364	Irf4	-1.41562
ENSMUSG00000027368	ENSMUST00000028846,ENSMUST00000146479	dual specificity phosphatase 2	13537	Dusp2	-1.40978
ENSMUSG00000051339	ENSMUST00000050125,ENSMUST00000211733,ENSMUST00000212276	RIKEN cDNA 2900026A02 gene	243219	2900026A02Rik	-1.4077
ENSMUSG00000036832	ENSMUST00000039164	lysophosphatidic acid receptor 3	65086	Lpar3	-1.40757
ENSMUSG00000020961	ENSMUST00000052969,ENSMUST00000111609,ENSMUST00000164713,ENSMUST00000166008,ENSMUST00000166967,ENSMUST00000170077,ENSMUST00000170984	stonin 2	108800	Ston2	-1.4037
ENSMUSG00000016496	ENSMUST00000016640	CD274 antigen	60533	Cd274	-1.40205
ENSMUSG00000107715	ENSMUST00000205221	predicted gene, 44135	NA	Gm44135	-1.40156
ENSMUSG00000042331	ENSMUST00000049836,ENSMUST00000092415,ENSMUST00000108709,ENSMUST00000136971,ENSMUST00000200742,ENSMUST00000201015,ENSMUST00000201364,ENSMUST00000201624,ENSMUST00000201671,ENSMUST00000201723,ENSMUST00000201866,ENSMUST00000202178,ENSMUST00000202179,ENSMUST00000202389,ENSMUST00000202744,ENSMUST00000202869,ENSMUST00000202905	sperm antigen with calponin homology and coiled-coil domains 1	432572	Specc1	-1.39998
ENSMUSG00000026977	ENSMUST00000067542,ENSMUST00000102747,ENSMUST00000102748,ENSMUST00000126986,ENSMUST00000131813,ENSMUST00000134905,ENSMUST00000136367,ENSMUST00000142485,ENSMUST00000143806	membrane-associated ring finger (C3HC4) 7	57438	Marchf7	-1.39883
ENSMUSG00000026360	ENSMUST00000027606,ENSMUST00000127206,ENSMUST00000134817,ENSMUST00000153527	regulator of G-protein signaling 2	19735	Rgs2	-1.39496
ENSMUSG00000033767	ENSMUST00000052342,ENSMUST00000191758,ENSMUST00000192095,ENSMUST00000192283,ENSMUST00000192811,ENSMUST00000193696,ENSMUST00000194432,ENSMUST00000194522,ENSMUST00000194993,ENSMUST00000195245,ENSMUST00000199411	transmembrane 131 like	229473	Tmem131l	-1.39441
ENSMUSG00000030468	ENSMUST00000005592,ENSMUST00000123042,ENSMUST00000124502,ENSMUST00000124885,ENSMUST00000131744,ENSMUST00000154322	sialic acid binding Ig-like lectin G	243958	Siglecg	-1.39132
ENSMUSG00000044345	ENSMUST00000061111,ENSMUST00000184186	MARVEL (membrane-associating) domain containing 1	277010	Marveld1	-1.39088
ENSMUSG00000027315	ENSMUST00000028783,ENSMUST00000110816,ENSMUST00000110817,ENSMUST00000134872,ENSMUST00000139903	serine protease inhibitor, Kunitz type 1	20732	Spint1	-1.38826
ENSMUSG00000006800	ENSMUST00000088086,ENSMUST00000109249,ENSMUST00000125503,ENSMUST00000133395,ENSMUST00000139266,ENSMUST00000143996,ENSMUST00000146497	sulfatase 2	72043	Sulf2	-1.38806
ENSMUSG00000027858	ENSMUST00000029451,ENSMUST00000119902,ENSMUST00000196611,ENSMUST00000197345	tetraspanin 2	70747	Tspan2	-1.3876
ENSMUSG00000067610	ENSMUST00000088046	killer cell lectin-like receptor family I member 1	503550	Klri1	-1.38627
ENSMUSG00000049532	ENSMUST00000058326,ENSMUST00000135523	spalt like transcription factor 2	50524	Sall2	-1.38545
ENSMUSG00000048546	ENSMUST00000050467,ENSMUST00000229500,ENSMUST00000230448,ENSMUST00000231000	transducer of ERBB2, 2	57259	Tob2	-1.38534
ENSMUSG00000002983	ENSMUST00000049912,ENSMUST00000094762,ENSMUST00000098754,ENSMUST00000130543,ENSMUST00000131759,ENSMUST00000137615,ENSMUST00000141586,ENSMUST00000148040,ENSMUST00000153309,ENSMUST00000208087	avian reticuloendotheliosis viral (v-rel) oncogene related B	19698	Relb	-1.38287
ENSMUSG00000038970	ENSMUST00000041804	lemur tyrosine kinase 2	231876	Lmtk2	-1.38018
ENSMUSG00000075269	ENSMUST00000099990,ENSMUST00000231512,ENSMUST00000231941	brain expressed family member 6	328660	Bex6	-1.37806
ENSMUSG00000039713	ENSMUST00000084115,ENSMUST00000105661,ENSMUST00000105662,ENSMUST00000118648,ENSMUST00000123615,ENSMUST00000140085,ENSMUST00000142412,ENSMUST00000239025,ENSMUST00000239128	pleckstrin homology domain containing, family G (with RhoGef domain) member 5	269608	Plekhg5	-1.37575
ENSMUSG00000019256	ENSMUST00000110811,ENSMUST00000116436,ENSMUST00000173414	aryl-hydrocarbon receptor	11622	Ahr	-1.36663
ENSMUSG00000074342	ENSMUST00000098758,ENSMUST00000126230,ENSMUST00000196099	RIKEN cDNA I830077J02 gene	433638	I830077J02Rik	-1.36348
ENSMUSG00000049866	ENSMUST00000051236,ENSMUST00000159814,ENSMUST00000187810	ADP-ribosylation factor-like 4C	320982	Arl4c	-1.36252
ENSMUSG00000023991	ENSMUST00000097311,ENSMUST00000113262,ENSMUST00000113263,ENSMUST00000113265,ENSMUST00000136314,ENSMUST00000137039,ENSMUST00000153752,ENSMUST00000154108	forkhead box P4	74123	Foxp4	-1.36195
ENSMUSG00000045817	ENSMUST00000060366	zinc finger protein 36, C3H type-like 2	12193	Zfp36l2	-1.36054
ENSMUSG00000036273	ENSMUST00000060642,ENSMUST00000133743,ENSMUST00000137657,ENSMUST00000140734,ENSMUST00000156900,ENSMUST00000172797	leucine-rich repeat kinase 2	66725	Lrrk2	-1.35415
ENSMUSG00000027829	ENSMUST00000029416,ENSMUST00000122919,ENSMUST00000129002,ENSMUST00000132998,ENSMUST00000135719,ENSMUST00000142153,ENSMUST00000144810,ENSMUST00000145186,ENSMUST00000146284,ENSMUST00000148623,ENSMUST00000149160,ENSMUST00000149729,ENSMUST00000150304,ENSMUST00000154585	cyclin L1	56706	Ccnl1	-1.3489
ENSMUSG00000043323	ENSMUST00000056124,ENSMUST00000069483,ENSMUST00000196801,ENSMUST00000198415,ENSMUST00000198768,ENSMUST00000198834,ENSMUST00000200293	fibrosin-like 1	381668	Fbrsl1	-1.34749
ENSMUSG00000022540	ENSMUST00000023191,ENSMUST00000090453,ENSMUST00000201077,ENSMUST00000201118,ENSMUST00000201651,ENSMUST00000201726,ENSMUST00000202281,ENSMUST00000202640,ENSMUST00000202720,ENSMUST00000202998	rogdi homolog	66049	Rogdi	-1.34736
ENSMUSG00000051314	ENSMUST00000053156,ENSMUST00000163504,ENSMUST00000168528,ENSMUST00000186059,ENSMUST00000186339,ENSMUST00000186534	free fatty acid receptor 2	233079	Ffar2	-1.34473
ENSMUSG00000020589	ENSMUST00000069005,ENSMUST00000069066,ENSMUST00000221782,ENSMUST00000222357,ENSMUST00000223061	family with sequence similarity 49, member A	76820	Fam49a	-1.34389
ENSMUSG00000031488	ENSMUST00000033878,ENSMUST00000054212,ENSMUST00000209377,ENSMUST00000210187,ENSMUST00000210919,ENSMUST00000211646	RAB11 family interacting protein 1 (class I)	75767	Rab11fip1	-1.34273
ENSMUSG00000026875	ENSMUST00000028234,ENSMUST00000113064,ENSMUST00000129131,ENSMUST00000135870,ENSMUST00000141238,ENSMUST00000156479,ENSMUST00000172159,ENSMUST00000201335,ENSMUST00000201690	TNF receptor-associated factor 1	22029	Traf1	-1.3422
ENSMUSG00000024899	ENSMUST00000025833,ENSMUST00000235594,ENSMUST00000236290	3'-phosphoadenosine 5'-phosphosulfate synthase 2	23972	Papss2	-1.34109
ENSMUSG00000058258	ENSMUST00000169314,ENSMUST00000176851,ENSMUST00000177397,ENSMUST00000177400,ENSMUST00000177447	isopentenyl-diphosphate delta isomerase	319554	Idi1	-1.33982
ENSMUSG00000032688	ENSMUST00000049248,ENSMUST00000224056,ENSMUST00000224229,ENSMUST00000224265,ENSMUST00000225085,ENSMUST00000225659,ENSMUST00000235209,ENSMUST00000235999,ENSMUST00000236050,ENSMUST00000236284,ENSMUST00000236314,ENSMUST00000237488,ENSMUST00000237739	MALT1 paracaspase	240354	Malt1	-1.33882
ENSMUSG00000033319	ENSMUST00000036226	fem-1 homolog c (C.elegans)	240263	Fem1c	-1.33748
ENSMUSG00000039062	ENSMUST00000049004,ENSMUST00000107392,ENSMUST00000149164,ENSMUST00000205502,ENSMUST00000206235,ENSMUST00000206682	alanyl (membrane) aminopeptidase	16790	Anpep	-1.33635
ENSMUSG00000040363	ENSMUST00000043441,ENSMUST00000065143,ENSMUST00000115512,ENSMUST00000115513,ENSMUST00000123004,ENSMUST00000124033,ENSMUST00000145872,ENSMUST00000209776	BCL6 interacting corepressor	71458	Bcor	-1.33463
ENSMUSG00000052632	ENSMUST00000050990,ENSMUST00000064595,ENSMUST00000090834,ENSMUST00000101562,ENSMUST00000174530	ArfGAP with SH3 domain, ankyrin repeat and PH domain 2	211914	Asap2	-1.3323
ENSMUSG00000009418	ENSMUST00000040599,ENSMUST00000067414,ENSMUST00000112103,ENSMUST00000187311,ENSMUST00000189252,ENSMUST00000189362,ENSMUST00000190130,ENSMUST00000190298,ENSMUST00000190735	neuron navigator 1	215690	Nav1	-1.33185
ENSMUSG00000066595	ENSMUST00000085635,ENSMUST00000191946,ENSMUST00000192666,ENSMUST00000193399,ENSMUST00000194589,ENSMUST00000194917	feline leukemia virus subgroup C cellular receptor 1	226844	Flvcr1	-1.33148
ENSMUSG00000003746	ENSMUST00000003843,ENSMUST00000105469,ENSMUST00000105470,ENSMUST00000133330,ENSMUST00000146483,ENSMUST00000218317,ENSMUST00000219234,ENSMUST00000220088	mannosidase 1, alpha	17155	Man1a	-1.32846
ENSMUSG00000039985	ENSMUST00000054080,ENSMUST00000081956,ENSMUST00000111562,ENSMUST00000127063,ENSMUST00000132696,ENSMUST00000139355,ENSMUST00000143963,ENSMUST00000146457,ENSMUST00000203164,ENSMUST00000204119,ENSMUST00000204435,ENSMUST00000204590	SIN3-HDAC complex associated factor	56306	Sinhcaf	-1.32462
ENSMUSG00000074305	ENSMUST00000061552,ENSMUST00000185775,ENSMUST00000186735,ENSMUST00000188142	pseudopodium-enriched atypical kinase 1	244895	Peak1	-1.32275
ENSMUSG00000001248	ENSMUST00000001280,ENSMUST00000085636,ENSMUST00000185514,ENSMUST00000185589,ENSMUST00000185985,ENSMUST00000186634,ENSMUST00000186723,ENSMUST00000187679,ENSMUST00000188032,ENSMUST00000202814,ENSMUST00000205298,ENSMUST00000206233,ENSMUST00000206432,ENSMUST00000220635	GRAM domain containing 1A	52857	Gramd1a	-1.3227
ENSMUSG00000025278	ENSMUST00000052678,ENSMUST00000228206	filamin, beta	286940	Flnb	-1.32204
ENSMUSG00000040537	ENSMUST00000046838,ENSMUST00000050166,ENSMUST00000088744,ENSMUST00000088761,ENSMUST00000115385,ENSMUST00000115386,ENSMUST00000115388,ENSMUST00000123168,ENSMUST00000124121,ENSMUST00000126384,ENSMUST00000130315,ENSMUST00000136524,ENSMUST00000136808,ENSMUST00000138652,ENSMUST00000139048,ENSMUST00000139841,ENSMUST00000143929,ENSMUST00000144241,ENSMUST00000153427,ENSMUST00000153889,ENSMUST00000154935,…	a disintegrin and metallopeptidase domain 22	11496	Adam22	-1.32164
ENSMUSG00000024235	ENSMUST00000025078,ENSMUST00000105472,ENSMUST00000172805,ENSMUST00000173708,ENSMUST00000173930	mitogen-activated protein kinase kinase kinase 8	26410	Map3k8	-1.32122
ENSMUSG00000004709	ENSMUST00000004829,ENSMUST00000194170,ENSMUST00000194797,ENSMUST00000195804	CD244 molecule A	18106	Cd244a	-1.31985
ENSMUSG00000033949	ENSMUST00000037011,ENSMUST00000167364,ENSMUST00000237526	tripartite motif-containing 36	28105	Trim36	-1.31834
ENSMUSG00000060090	ENSMUST00000033372,ENSMUST00000115387,ENSMUST00000115391,ENSMUST00000133619,ENSMUST00000134349	retinitis pigmentosa 2 homolog	19889	Rp2	-1.31824
ENSMUSG00000031441	ENSMUST00000033818,ENSMUST00000091237,ENSMUST00000125031,ENSMUST00000127197,ENSMUST00000131804,ENSMUST00000132974,ENSMUST00000133338,ENSMUST00000136918,ENSMUST00000139545,ENSMUST00000143359,ENSMUST00000152273	ATPase, class VI, type 11A	50770	Atp11a	-1.31745
ENSMUSG00000070691	ENSMUST00000056977,ENSMUST00000119564,ENSMUST00000127109,ENSMUST00000137027,ENSMUST00000140642,ENSMUST00000156478	runt related transcription factor 3	12399	Runx3	-1.31707
ENSMUSG00000008398	ENSMUST00000008542,ENSMUST00000129827,ENSMUST00000133365,ENSMUST00000151153	ELK3, member of ETS oncogene family	13713	Elk3	-1.3162
ENSMUSG00000003847	ENSMUST00000075922,ENSMUST00000077440,ENSMUST00000125721,ENSMUST00000126333,ENSMUST00000126397,ENSMUST00000133026,ENSMUST00000144100,ENSMUST00000147588,ENSMUST00000148006,ENSMUST00000149972,ENSMUST00000151114,ENSMUST00000151582,ENSMUST00000154474,ENSMUST00000169453	nuclear factor of activated T cells 5	54446	Nfat5	-1.31564
ENSMUSG00000027583	ENSMUST00000029106,ENSMUST00000087409,ENSMUST00000146446,ENSMUST00000155535,ENSMUST00000180222	zinc finger and BTB domain containing 46	72147	Zbtb46	-1.31521
ENSMUSG00000024789	ENSMUST00000025705,ENSMUST00000065796,ENSMUST00000236990,ENSMUST00000238009	Janus kinase 2	16452	Jak2	-1.31492
ENSMUSG00000038608	ENSMUST00000077946,ENSMUST00000186087,ENSMUST00000186835,ENSMUST00000187698,ENSMUST00000187774,ENSMUST00000187885,ENSMUST00000189486,ENSMUST00000190595,ENSMUST00000190983,ENSMUST00000191449,ENSMUST00000191505	dedicator of cytokinesis 10	210293	Dock10	-1.31487
ENSMUSG00000028893	ENSMUST00000030724	sestrin 2	230784	Sesn2	-1.31332
ENSMUSG00000030745	ENSMUST00000033000,ENSMUST00000206103,ENSMUST00000206234	interleukin 21 receptor	60504	Il21r	-1.30995
ENSMUSG00000039046	ENSMUST00000042503,ENSMUST00000114937,ENSMUST00000132391,ENSMUST00000150515	USP6 N-terminal like	98910	Usp6nl	-1.30842
ENSMUSG00000026819	ENSMUST00000028160,ENSMUST00000052119,ENSMUST00000113307,ENSMUST00000113308,ENSMUST00000113310,ENSMUST00000127961,ENSMUST00000128611,ENSMUST00000136361,ENSMUST00000143092,ENSMUST00000153782,ENSMUST00000153886,ENSMUST00000194756	solute carrier family 25 (mitochondrial carrier, phosphate carrier), member 25	227731	Slc25a25	-1.3077
ENSMUSG00000004633	ENSMUST00000046856,ENSMUST00000067741,ENSMUST00000114401,ENSMUST00000114402,ENSMUST00000114403,ENSMUST00000127323,ENSMUST00000133315,ENSMUST00000138930,ENSMUST00000146114,ENSMUST00000203091,ENSMUST00000203941,ENSMUST00000204115,ENSMUST00000204410,ENSMUST00000204746,ENSMUST00000204921	chimerin 2	69993	Chn2	-1.30719
ENSMUSG00000020941	ENSMUST00000021324,ENSMUST00000146163,ENSMUST00000152300,ENSMUST00000152677	mitogen-activated protein kinase kinase kinase 14	53859	Map3k14	-1.30432
ENSMUSG00000004677	ENSMUST00000071935,ENSMUST00000168839,ENSMUST00000170242,ENSMUST00000212173,ENSMUST00000212412,ENSMUST00000212935	myosin IXb	17925	Myo9b	-1.30267
ENSMUSG00000021338	ENSMUST00000072889,ENSMUST00000110398,ENSMUST00000123076,ENSMUST00000125420,ENSMUST00000125901,ENSMUST00000128416,ENSMUST00000136517,ENSMUST00000140042,ENSMUST00000142171,ENSMUST00000144159,ENSMUST00000147261,ENSMUST00000151566	capping protein regulator and myosin 1 linker 1	68732	Carmil1	-1.30264
ENSMUSG00000063382	ENSMUST00000074989,ENSMUST00000217898,ENSMUST00000218183,ENSMUST00000218913,ENSMUST00000220292,ENSMUST00000220303	B cell CLL/lymphoma 9-like	80288	Bcl9l	-1.29932
ENSMUSG00000071042	ENSMUST00000095204,ENSMUST00000164192,ENSMUST00000234011,ENSMUST00000234640,ENSMUST00000234644,ENSMUST00000234660,ENSMUST00000235103	RAS, guanyl releasing protein 3	240168	Rasgrp3	-1.29872
ENSMUSG00000050912	ENSMUST00000052865,ENSMUST00000136904,ENSMUST00000154371	transmembrane protein 123	71929	Tmem123	-1.29842
ENSMUSG00000049307	ENSMUST00000061498	fucosyltransferase 4	14345	Fut4	-1.29735
ENSMUSG00000039384	ENSMUST00000048655,ENSMUST00000139839	dual specificity phosphatase 10	63953	Dusp10	-1.29624
ENSMUSG00000041235	ENSMUST00000039267,ENSMUST00000051558,ENSMUST00000127476,ENSMUST00000129655,ENSMUST00000130709,ENSMUST00000170391,ENSMUST00000170457,ENSMUST00000222546	chromodomain helicase DNA binding protein 7	320790	Chd7	-1.29544
ENSMUSG00000101970	ENSMUST00000183916,ENSMUST00000184554,ENSMUST00000184587,ENSMUST00000184655,ENSMUST00000184855,ENSMUST00000187421,ENSMUST00000189960,ENSMUST00000190028	RIKEN cDNA 1810026B05 gene	NA	1810026B05Rik	-1.29456
ENSMUSG00000020719	ENSMUST00000021062,ENSMUST00000106778,ENSMUST00000106779,ENSMUST00000123339,ENSMUST00000127481,ENSMUST00000129585,ENSMUST00000130172,ENSMUST00000133426,ENSMUST00000151741	DEAD (Asp-Glu-Ala-Asp) box polypeptide 5	13207	Ddx5	-1.29443
ENSMUSG00000028080	ENSMUST00000107635,ENSMUST00000192145,ENSMUST00000194674,ENSMUST00000194759,ENSMUST00000195398,ENSMUST00000195524,ENSMUST00000195966,ENSMUST00000212390	LPS-responsive beige-like anchor	80877	Lrba	-1.29393
ENSMUSG00000029650	ENSMUST00000031655,ENSMUST00000118527,ENSMUST00000138244,ENSMUST00000152064	solute carrier family 46, member 3	71706	Slc46a3	-1.2929
ENSMUSG00000019841	ENSMUST00000019986,ENSMUST00000123103,ENSMUST00000127726,ENSMUST00000131186,ENSMUST00000139803,ENSMUST00000145333,ENSMUST00000164763	REV3 like, DNA directed polymerase zeta catalytic subunit	19714	Rev3l	-1.29248
ENSMUSG00000038894	ENSMUST00000040514	insulin receptor substrate 2	384783	Irs2	-1.29238
ENSMUSG00000019951	ENSMUST00000020112,ENSMUST00000218607,ENSMUST00000218776,ENSMUST00000219117,ENSMUST00000219712,ENSMUST00000219749,ENSMUST00000219819,ENSMUST00000220375	UHRF1 (ICBP90) binding protein 1-like	75089	Uhrf1bp1l	-1.29145
ENSMUSG00000022436	ENSMUST00000001226,ENSMUST00000061239,ENSMUST00000109698,ENSMUST00000132047,ENSMUST00000148893,ENSMUST00000151146,ENSMUST00000229492,ENSMUST00000229803,ENSMUST00000231057	SH3-domain binding protein 1	20401	Sh3bp1	-1.2876
ENSMUSG00000012350	ENSMUST00000090475,ENSMUST00000111174,ENSMUST00000111176,ENSMUST00000125788,ENSMUST00000128546,ENSMUST00000137774,ENSMUST00000140503,ENSMUST00000151265	ets homologous factor	13661	Ehf	-1.28652
ENSMUSG00000038056	ENSMUST00000045291,ENSMUST00000172556,ENSMUST00000172626,ENSMUST00000172707,ENSMUST00000173073,ENSMUST00000173174,ENSMUST00000173673,ENSMUST00000174734	lysine (K)-specific methyltransferase 2C	231051	Kmt2c	-1.2862
ENSMUSG00000059975	ENSMUST00000032797,ENSMUST00000108205,ENSMUST00000108211,ENSMUST00000108212,ENSMUST00000149793	zinc finger protein 74	72723	Zfp74	-1.28518
ENSMUSG00000058881	ENSMUST00000071233,ENSMUST00000171238,ENSMUST00000235793,ENSMUST00000235902,ENSMUST00000236468,ENSMUST00000236858,ENSMUST00000237340	zinc finger protein 516	329003	Zfp516	-1.28402
ENSMUSG00000030789	ENSMUST00000033053,ENSMUST00000205408,ENSMUST00000205460,ENSMUST00000206396	integrin alpha X	16411	Itgax	-1.28365
ENSMUSG00000032216	ENSMUST00000034740,ENSMUST00000183375,ENSMUST00000183451,ENSMUST00000184020,ENSMUST00000184180,ENSMUST00000184287,ENSMUST00000184333,ENSMUST00000184386,ENSMUST00000184450,ENSMUST00000184737,ENSMUST00000238315,ENSMUST00000238368	neural precursor cell expressed, developmentally down-regulated 4	17999	Nedd4	-1.28282
ENSMUSG00000042121	ENSMUST00000077689,ENSMUST00000112298,ENSMUST00000159510,ENSMUST00000159592,ENSMUST00000162322,ENSMUST00000162396	slingshot protein phosphatase 1	231637	Ssh1	-1.2794
ENSMUSG00000025153	ENSMUST00000055655,ENSMUST00000146541,ENSMUST00000155276,ENSMUST00000205905,ENSMUST00000206589,ENSMUST00000206637	fatty acid synthase	14104	Fasn	-1.27829
ENSMUSG00000016933	ENSMUST00000017077,ENSMUST00000103115,ENSMUST00000109462,ENSMUST00000124652,ENSMUST00000129568,ENSMUST00000143997,ENSMUST00000147254,ENSMUST00000151590,ENSMUST00000173061,ENSMUST00000173335,ENSMUST00000173791,ENSMUST00000174885	phospholipase C, gamma 1	18803	Plcg1	-1.27371
ENSMUSG00000005672	ENSMUST00000005815,ENSMUST00000136002,ENSMUST00000143221,ENSMUST00000144270,ENSMUST00000148993,ENSMUST00000151357,ENSMUST00000201240,ENSMUST00000202167	KIT proto-oncogene receptor tyrosine kinase	16590	Kit	-1.2731
ENSMUSG00000027751	ENSMUST00000029315,ENSMUST00000170552,ENSMUST00000197502,ENSMUST00000197568,ENSMUST00000198745,ENSMUST00000199652,ENSMUST00000199655,ENSMUST00000199674,ENSMUST00000200024,ENSMUST00000200439,ENSMUST00000200441,ENSMUST00000200450	suppressor of Ty 20	56790	Supt20	-1.27196
ENSMUSG00000041538	ENSMUST00000095342,ENSMUST00000167280,ENSMUST00000172952,ENSMUST00000173681,ENSMUST00000173764,ENSMUST00000236838,ENSMUST00000237064	histocompatibility 2, O region beta locus	15002	H2-Ob	-1.27074
ENSMUSG00000056919	ENSMUST00000093802,ENSMUST00000139301,ENSMUST00000144137,ENSMUST00000188289	centrosomal protein 162	382090	Cep162	-1.27012
ENSMUSG00000025409	ENSMUST00000026476,ENSMUST00000119078,ENSMUST00000126243,ENSMUST00000136169,ENSMUST00000154851,ENSMUST00000156208,ENSMUST00000172567	methyl-CpG binding domain protein 6	110962	Mbd6	-1.26811
ENSMUSG00000031709	ENSMUST00000034145,ENSMUST00000093393,ENSMUST00000142673	TBC1 domain family, member 9	71310	Tbc1d9	-1.2676
ENSMUSG00000040297	ENSMUST00000048377,ENSMUST00000191841,ENSMUST00000191975,ENSMUST00000192422,ENSMUST00000192570,ENSMUST00000194106,ENSMUST00000194388	SUN domain containing ossification factor	226551	Suco	-1.26737
ENSMUSG00000056899	ENSMUST00000080160,ENSMUST00000132121,ENSMUST00000134965,ENSMUST00000140790,ENSMUST00000153184	IMP2 inner mitochondrial membrane peptidase-like (S. cerevisiae)	93757	Immp2l	-1.2673
ENSMUSG00000021608	ENSMUST00000022099,ENSMUST00000123766,ENSMUST00000124627,ENSMUST00000133791,ENSMUST00000140431,ENSMUST00000147566,ENSMUST00000222881,ENSMUST00000223060	lysophosphatidylcholine acyltransferase 1	210992	Lpcat1	-1.26549
ENSMUSG00000029992	ENSMUST00000032057,ENSMUST00000113655,ENSMUST00000113657,ENSMUST00000113658,ENSMUST00000146410,ENSMUST00000150410,ENSMUST00000204872	glutamine fructose-6-phosphate transaminase 1	14583	Gfpt1	-1.26463
ENSMUSG00000042042	ENSMUST00000049344,ENSMUST00000125531,ENSMUST00000136265	chondroitin sulfate N-acetylgalactosaminyltransferase 2	78752	Csgalnact2	-1.2597
ENSMUSG00000027339	ENSMUST00000028814,ENSMUST00000103182,ENSMUST00000139047,ENSMUST00000140791,ENSMUST00000155829	Ras association (RalGDS/AF-6) domain family member 2	215653	Rassf2	-1.25815
ENSMUSG00000026098	ENSMUST00000027267,ENSMUST00000126412,ENSMUST00000126590,ENSMUST00000128337,ENSMUST00000133358,ENSMUST00000135246,ENSMUST00000142922,ENSMUST00000188890	PMS1 homolog 1, mismatch repair system component	227099	Pms1	-1.25623
ENSMUSG00000021451	ENSMUST00000021900,ENSMUST00000110039,ENSMUST00000110040,ENSMUST00000110042,ENSMUST00000125511,ENSMUST00000138228,ENSMUST00000139018,ENSMUST00000139858,ENSMUST00000139865,ENSMUST00000143396,ENSMUST00000146238,ENSMUST00000146922,ENSMUST00000150662,ENSMUST00000155896	sema domain, immunoglobulin domain (Ig), transmembrane domain (TM) and short cytoplasmic domain, (semaphorin) 4D	20354	Sema4d	-1.2559
ENSMUSG00000026655	ENSMUST00000027965,ENSMUST00000115052,ENSMUST00000115053,ENSMUST00000115054,ENSMUST00000115055,ENSMUST00000176254,ENSMUST00000177037,ENSMUST00000177125,ENSMUST00000226435	family with sequence similarity 107, member B	66540	Fam107b	-1.25571
ENSMUSG00000037426	ENSMUST00000049780,ENSMUST00000087897,ENSMUST00000118698,ENSMUST00000119705,ENSMUST00000120902,ENSMUST00000124780,ENSMUST00000125574,ENSMUST00000127560,ENSMUST00000130461,ENSMUST00000137169,ENSMUST00000139098,ENSMUST00000139463,ENSMUST00000141812,ENSMUST00000149350,ENSMUST00000150130,ENSMUST00000195980,ENSMUST00000201802,ENSMUST00000201836,ENSMUST00000202927,ENSMUST00000238200	DEP domain containing 5	277854	Depdc5	-1.25431
ENSMUSG00000030199	ENSMUST00000081028,ENSMUST00000111963,ENSMUST00000145869,ENSMUST00000164648,ENSMUST00000169529	ets variant 6	14011	Etv6	-1.25224
ENSMUSG00000063550	ENSMUST00000070165,ENSMUST00000209242,ENSMUST00000210682,ENSMUST00000211005,ENSMUST00000211022,ENSMUST00000211235,ENSMUST00000211375,ENSMUST00000211764	nucleoporin 98	269966	Nup98	-1.25074
ENSMUSG00000005774	ENSMUST00000029772,ENSMUST00000107253,ENSMUST00000107254,ENSMUST00000107255,ENSMUST00000107260,ENSMUST00000132393,ENSMUST00000137088,ENSMUST00000140294,ENSMUST00000140331,ENSMUST00000142311,ENSMUST00000142708,ENSMUST00000144132,ENSMUST00000145031,ENSMUST00000145472,ENSMUST00000147237,ENSMUST00000148803,ENSMUST00000152869	regulatory factor X, 5 (influences HLA class II expression)	53970	Rfx5	-1.24997
ENSMUSG00000052889	ENSMUST00000064921,ENSMUST00000064989,ENSMUST00000127910,ENSMUST00000131167,ENSMUST00000143692,ENSMUST00000149583,ENSMUST00000205550,ENSMUST00000206495	protein kinase C, beta	18751	Prkcb	-1.24716
ENSMUSG00000039787	ENSMUST00000047521,ENSMUST00000134152,ENSMUST00000153863,ENSMUST00000154464,ENSMUST00000155355	cerebral endothelial cell adhesion molecule	99151	Cercam	-1.24647
ENSMUSG00000064289	ENSMUST00000078074,ENSMUST00000112494,ENSMUST00000112495,ENSMUST00000112501,ENSMUST00000112502,ENSMUST00000136688,ENSMUST00000139533,ENSMUST00000141544,ENSMUST00000143515,ENSMUST00000145632,ENSMUST00000154693	TRAF family member-associated Nf-kappa B activator	21353	Tank	-1.24644
ENSMUSG00000040697	ENSMUST00000038014,ENSMUST00000138654,ENSMUST00000153880	DnaJ heat shock protein family (Hsp40) member C16	214063	Dnajc16	-1.24543
ENSMUSG00000021670	ENSMUST00000022176,ENSMUST00000163201,ENSMUST00000168374,ENSMUST00000168855,ENSMUST00000169196,ENSMUST00000169202,ENSMUST00000169945,ENSMUST00000169966,ENSMUST00000170287,ENSMUST00000171537,ENSMUST00000172440	3-hydroxy-3-methylglutaryl-Coenzyme A reductase	15357	Hmgcr	-1.24516
ENSMUSG00000022463	ENSMUST00000023100,ENSMUST00000229009,ENSMUST00000229336,ENSMUST00000229518,ENSMUST00000230105,ENSMUST00000230955,ENSMUST00000231065	sterol regulatory element binding factor 2	20788	Srebf2	-1.24416
ENSMUSG00000069830	ENSMUST00000048514,ENSMUST00000108518	NLR family, pyrin domain containing 1A	195046	Nlrp1a	-1.2434
ENSMUSG00000018042	ENSMUST00000018186,ENSMUST00000162178,ENSMUST00000162834	cytochrome b5 reductase 3	109754	Cyb5r3	-1.24339
ENSMUSG00000026987	ENSMUST00000090925,ENSMUST00000112550,ENSMUST00000129124,ENSMUST00000130637,ENSMUST00000134908,ENSMUST00000135722,ENSMUST00000137480,ENSMUST00000138089,ENSMUST00000144893,ENSMUST00000147476,ENSMUST00000151756,ENSMUST00000152639,ENSMUST00000153136,ENSMUST00000153711	bromodomain adjacent to zinc finger domain, 2B	407823	Baz2b	-1.24256
ENSMUSG00000029338	ENSMUST00000031281,ENSMUST00000199088,ENSMUST00000202736	anthrax toxin receptor 2	71914	Antxr2	-1.24106
ENSMUSG00000037788	ENSMUST00000114297,ENSMUST00000127485,ENSMUST00000143953,ENSMUST00000145608,ENSMUST00000203212,ENSMUST00000204878	vesicular, overexpressed in cancer, prosurvival protein 1	232023	Vopp1	-1.24105
ENSMUSG00000037972	ENSMUST00000089011,ENSMUST00000228962	stannin	20621	Snn	-1.23986
ENSMUSG00000038344	ENSMUST00000041370,ENSMUST00000112314,ENSMUST00000112315,ENSMUST00000112316,ENSMUST00000131463,ENSMUST00000150080	taxilin gamma	353170	Txlng	-1.23959
ENSMUSG00000042599	ENSMUST00000002305,ENSMUST00000127036	lysine (K)-specific demethylase 7A	338523	Kdm7a	-1.23936
ENSMUSG00000033039	ENSMUST00000040320,ENSMUST00000229004,ENSMUST00000229031,ENSMUST00000229048,ENSMUST00000229113,ENSMUST00000229694,ENSMUST00000230202,ENSMUST00000230779	microtubule associated monooxygenase, calponin and LIM domain containing -like 1	27008	Micall1	-1.23797
ENSMUSG00000073792	ENSMUST00000097961,ENSMUST00000107004,ENSMUST00000124147,ENSMUST00000137473,ENSMUST00000139799,ENSMUST00000141870,ENSMUST00000144805	asparagine-linked glycosylation 6 (alpha-1,3,-glucosyltransferase)	320438	Alg6	-1.23773
ENSMUSG00000041954	ENSMUST00000040274,ENSMUST00000103173,ENSMUST00000122001,ENSMUST00000124339,ENSMUST00000125100,ENSMUST00000141260	tumor necrosis factor receptor superfamily, member 18	21936	Tnfrsf18	-1.23672
ENSMUSG00000028028	ENSMUST00000029662,ENSMUST00000159720,ENSMUST00000160586,ENSMUST00000161239,ENSMUST00000162859,ENSMUST00000198955	alpha-kinase 1	71481	Alpk1	-1.23661
ENSMUSG00000021277	ENSMUST00000021706,ENSMUST00000060274,ENSMUST00000117269,ENSMUST00000139162,ENSMUST00000143395	TNF receptor-associated factor 3	22031	Traf3	-1.23639
ENSMUSG00000029475	ENSMUST00000031435,ENSMUST00000046073,ENSMUST00000086200,ENSMUST00000118027,ENSMUST00000121739,ENSMUST00000123479,ENSMUST00000127403,ENSMUST00000129998,ENSMUST00000132419,ENSMUST00000134501,ENSMUST00000138929,ENSMUST00000139674,ENSMUST00000143273,ENSMUST00000145082,ENSMUST00000147544,ENSMUST00000150543,ENSMUST00000152872,ENSMUST00000156474,ENSMUST00000173355,ENSMUST00000174357	lysine (K)-specific demethylase 2B	30841	Kdm2b	-1.23591
ENSMUSG00000050919	ENSMUST00000056558	zinc finger protein 366	238803	Zfp366	-1.23537
ENSMUSG00000046111	ENSMUST00000058041,ENSMUST00000059410,ENSMUST00000098979,ENSMUST00000159156,ENSMUST00000160238,ENSMUST00000160692,ENSMUST00000160946,ENSMUST00000161132,ENSMUST00000161533,ENSMUST00000162264,ENSMUST00000162689,ENSMUST00000163010,ENSMUST00000217140,ENSMUST00000217407	centrosomal protein 295	319675	Cep295	-1.23502
ENSMUSG00000034663	ENSMUST00000035635,ENSMUST00000112974	BMP2 inducible kinase	140780	Bmp2k	-1.23334
ENSMUSG00000051316	ENSMUST00000066272	TATA-box binding protein associated factor 7	24074	Taf7	-1.23206
ENSMUSG00000038236	ENSMUST00000048715,ENSMUST00000134367,ENSMUST00000140316,ENSMUST00000150041,ENSMUST00000153280	homeobox A7	15404	Hoxa7	-1.23063
ENSMUSG00000073563	ENSMUST00000069597,ENSMUST00000236399,ENSMUST00000237880	casein kinase 1, gamma 3	70425	Csnk1g3	-1.22584
ENSMUSG00000026737	ENSMUST00000006912,ENSMUST00000148583,ENSMUST00000152981	phosphatidylinositol-5-phosphate 4-kinase, type II, alpha	18718	Pip4k2a	-1.2255
ENSMUSG00000041765	ENSMUST00000039803,ENSMUST00000226998,ENSMUST00000227684,ENSMUST00000227936	ubiquitin associated domain containing 2	68889	Ubac2	-1.22452
ENSMUSG00000035354	ENSMUST00000037968,ENSMUST00000207032,ENSMUST00000207919,ENSMUST00000208012,ENSMUST00000208502,ENSMUST00000208609,ENSMUST00000208992,ENSMUST00000209123	UV radiation resistance associated gene	78610	Uvrag	-1.22407
ENSMUSG00000026357	ENSMUST00000027603	regulator of G-protein signaling 18	64214	Rgs18	-1.22309
ENSMUSG00000043252	ENSMUST00000062684	transmembrane protein 64	100201	Tmem64	-1.22308
ENSMUSG00000042249	ENSMUST00000065167,ENSMUST00000195928,ENSMUST00000197776,ENSMUST00000197888,ENSMUST00000199337,ENSMUST00000200332	G protein-coupled receptor kinase 3	320129	Grk3	-1.22229
ENSMUSG00000037876	ENSMUST00000051446,ENSMUST00000173187,ENSMUST00000173236,ENSMUST00000173295,ENSMUST00000173661,ENSMUST00000173689,ENSMUST00000173762,ENSMUST00000173949,ENSMUST00000174062,ENSMUST00000174317,ENSMUST00000174408,ENSMUST00000219563	jumonji domain containing 1C	108829	Jmjd1c	-1.22123
ENSMUSG00000018401	ENSMUST00000092802,ENSMUST00000103179,ENSMUST00000119628,ENSMUST00000123105,ENSMUST00000134216,ENSMUST00000146871	myotubularin related protein 4	170749	Mtmr4	-1.22103
ENSMUSG00000041112	ENSMUST00000072519,ENSMUST00000180626,ENSMUST00000180767,ENSMUST00000181429,ENSMUST00000220751,ENSMUST00000221067,ENSMUST00000221595	engulfment and cell motility 1	140580	Elmo1	-1.21996
ENSMUSG00000021244	ENSMUST00000021670,ENSMUST00000101202,ENSMUST00000164558,ENSMUST00000165803,ENSMUST00000166605,ENSMUST00000167838,ENSMUST00000168977,ENSMUST00000169150	YLP motif containing 1	56531	Ylpm1	-1.21983
ENSMUSG00000025323	ENSMUST00000026367,ENSMUST00000221844,ENSMUST00000222314	trans-acting transcription factor 4	20688	Sp4	-1.21948
ENSMUSG00000042507	ENSMUST00000046266,ENSMUST00000110294,ENSMUST00000130038,ENSMUST00000137562,ENSMUST00000220974	ELM2 and Myb/SANT-like domain containing 1	238317	Elmsan1	-1.21944
ENSMUSG00000051506	ENSMUST00000061753,ENSMUST00000130509,ENSMUST00000132153,ENSMUST00000159606	WD repeat and FYVE domain containing 4	545030	Wdfy4	-1.21772
ENSMUSG00000032038	ENSMUST00000034537,ENSMUST00000213526,ENSMUST00000214526,ENSMUST00000215089,ENSMUST00000215463,ENSMUST00000215638,ENSMUST00000216557,ENSMUST00000217149,ENSMUST00000217542	ST3 beta-galactoside alpha-2,3-sialyltransferase 4	20443	St3gal4	-1.21742
ENSMUSG00000035000	ENSMUST00000047812,ENSMUST00000129738,ENSMUST00000149306,ENSMUST00000150979,ENSMUST00000151818,ENSMUST00000156871	dipeptidylpeptidase 4	13482	Dpp4	-1.2168
ENSMUSG00000023927	ENSMUST00000124222,ENSMUST00000129205,ENSMUST00000129667,ENSMUST00000133574,ENSMUST00000137697,ENSMUST00000140727,ENSMUST00000140979,ENSMUST00000144331,ENSMUST00000146414,ENSMUST00000148559,ENSMUST00000152830,ENSMUST00000156051,ENSMUST00000169480,ENSMUST00000176669	special AT-rich sequence binding protein 1	20230	Satb1	-1.21498
ENSMUSG00000025199	ENSMUST00000026217,ENSMUST00000119591,ENSMUST00000123806,ENSMUST00000134495,ENSMUST00000144286,ENSMUST00000146861,ENSMUST00000147423,ENSMUST00000149091	conserved helix-loop-helix ubiquitous kinase	12675	Chuk	-1.21416
ENSMUSG00000042605	ENSMUST00000051950,ENSMUST00000159828,ENSMUST00000159928,ENSMUST00000160093,ENSMUST00000160220,ENSMUST00000160462,ENSMUST00000160813,ENSMUST00000160821,ENSMUST00000161064,ENSMUST00000161159,ENSMUST00000161433,ENSMUST00000161836,ENSMUST00000161872,ENSMUST00000162327,ENSMUST00000162459,ENSMUST00000162611,ENSMUST00000199451,ENSMUST00000199864,ENSMUST00000200499,ENSMUST00000225761	ataxin 2	20239	Atxn2	-1.21242
ENSMUSG00000030165	ENSMUST00000032268,ENSMUST00000112063,ENSMUST00000119520,ENSMUST00000159077,ENSMUST00000159804,ENSMUST00000203965	killer cell lectin-like receptor, subfamily D, member 1	16643	Klrd1	-1.21188
ENSMUSG00000052748	ENSMUST00000064771,ENSMUST00000111883,ENSMUST00000124880,ENSMUST00000129939,ENSMUST00000131312,ENSMUST00000138095,ENSMUST00000139244,ENSMUST00000141977,ENSMUST00000185247,ENSMUST00000189595	SWT1 RNA endoribonuclease homolog (S. cerevisiae)	66875	Swt1	-1.21086
ENSMUSG00000040021	ENSMUST00000040043,ENSMUST00000165952,ENSMUST00000217931	large tumor suppressor	16798	Lats1	-1.21079
ENSMUSG00000058486	ENSMUST00000081214,ENSMUST00000133336,ENSMUST00000134830,ENSMUST00000145765,ENSMUST00000146968,ENSMUST00000149448,ENSMUST00000152488,ENSMUST00000201569	WD repeat domain 91	101240	Wdr91	-1.21018
ENSMUSG00000024045	ENSMUST00000002699,ENSMUST00000235205,ENSMUST00000235360,ENSMUST00000235702,ENSMUST00000235764,ENSMUST00000236267,ENSMUST00000236303,ENSMUST00000236580,ENSMUST00000236761,ENSMUST00000236785,ENSMUST00000236954,ENSMUST00000237103,ENSMUST00000237381,ENSMUST00000237733,ENSMUST00000237860,ENSMUST00000238151	A kinase (PRKA) anchor protein 8	56399	Akap8	-1.20891
ENSMUSG00000009406	ENSMUST00000009550,ENSMUST00000148133	ELK1, member of ETS oncogene family	13712	Elk1	-1.20872
ENSMUSG00000078671	ENSMUST00000026895,ENSMUST00000038366,ENSMUST00000169922,ENSMUST00000172704,ENSMUST00000173785,ENSMUST00000181971,ENSMUST00000197642,ENSMUST00000197800,ENSMUST00000198225,ENSMUST00000199601,ENSMUST00000199641,ENSMUST00000199809,ENSMUST00000199831,ENSMUST00000200218,ENSMUST00000200423,ENSMUST00000200492,ENSMUST00000206665,ENSMUST00000208458	chromodomain helicase DNA binding protein 2	244059	Chd2	-1.20818
ENSMUSG00000040760	ENSMUST00000036570,ENSMUST00000141599,ENSMUST00000142261,ENSMUST00000142645,ENSMUST00000224406	adaptor protein, phosphotyrosine interaction, PH domain and leucine zipper containing 1	72993	Appl1	-1.20618
ENSMUSG00000024639	ENSMUST00000025541,ENSMUST00000167656,ENSMUST00000170229	guanine nucleotide binding protein, alpha q polypeptide	14682	Gnaq	-1.20563
ENSMUSG00000042508	ENSMUST00000071921,ENSMUST00000095017,ENSMUST00000183347,ENSMUST00000183448,ENSMUST00000183525,ENSMUST00000183792,ENSMUST00000183973,ENSMUST00000184120,ENSMUST00000184159,ENSMUST00000184370,ENSMUST00000184372,ENSMUST00000184401,ENSMUST00000184620,ENSMUST00000184888,ENSMUST00000184903,ENSMUST00000184947,ENSMUST00000185100,ENSMUST00000185193	cyclin D binding myb-like transcription factor 1	23857	Dmtf1	-1.20418
ENSMUSG00000035051	ENSMUST00000038166,ENSMUST00000086555,ENSMUST00000234703,ENSMUST00000234733,ENSMUST00000235024	DEAH (Asp-Glu-Ala-Asp/His) box polypeptide 57	106794	Dhx57	-1.204
ENSMUSG00000036206	ENSMUST00000066279,ENSMUST00000123745	SH3-domain binding protein 4	98402	Sh3bp4	-1.20319
ENSMUSG00000037754	ENSMUST00000045503,ENSMUST00000052927,ENSMUST00000103116,ENSMUST00000129902,ENSMUST00000145073	protein phosphatase 1, regulatory subunit 16B	228852	Ppp1r16b	-1.20289
ENSMUSG00000024238	ENSMUST00000025081,ENSMUST00000159390,ENSMUST00000159477,ENSMUST00000160522,ENSMUST00000160910,ENSMUST00000161295,ENSMUST00000162892,ENSMUST00000175739,ENSMUST00000175925,ENSMUST00000177030,ENSMUST00000177070,ENSMUST00000224200	zinc finger E-box binding homeobox 1	21417	Zeb1	-1.20203
ENSMUSG00000049470	ENSMUST00000060945,ENSMUST00000129019,ENSMUST00000130152,ENSMUST00000136470,ENSMUST00000139054,ENSMUST00000152616,ENSMUST00000153821,ENSMUST00000154499	AF4/FMR2 family, member 4	93736	Aff4	-1.20185
ENSMUSG00000032280	ENSMUST00000034820,ENSMUST00000159050,ENSMUST00000159140,ENSMUST00000159386,ENSMUST00000159630,ENSMUST00000160541,ENSMUST00000160724,ENSMUST00000160882,ENSMUST00000161194,ENSMUST00000161207,ENSMUST00000161689,ENSMUST00000161993,ENSMUST00000162127,ENSMUST00000162281,ENSMUST00000162583,ENSMUST00000162962,ENSMUST00000162973,ENSMUST00000178113	transducin-like enhancer of split 3	21887	Tle3	-1.20132
ENSMUSG00000039747	ENSMUST00000041048,ENSMUST00000196454,ENSMUST00000197052,ENSMUST00000198268	ORAI calcium release-activated calcium modulator 2	269717	Orai2	-1.20078
ENSMUSG00000024805	ENSMUST00000062389,ENSMUST00000071267,ENSMUST00000224679,ENSMUST00000224772,ENSMUST00000224805,ENSMUST00000224859,ENSMUST00000224971,ENSMUST00000225050,ENSMUST00000225185,ENSMUST00000225411,ENSMUST00000225920	polycomb group ring finger 5	76073	Pcgf5	-1.20035
ENSMUSG00000031749	ENSMUST00000034197,ENSMUST00000117534,ENSMUST00000129639,ENSMUST00000138332,ENSMUST00000141464	ST3 beta-galactoside alpha-2,3-sialyltransferase 2	20444	St3gal2	-1.19921
ENSMUSG00000054823	ENSMUST00000084026,ENSMUST00000129959,ENSMUST00000136107,ENSMUST00000139966,ENSMUST00000141781,ENSMUST00000142395,ENSMUST00000143445,ENSMUST00000146919,ENSMUST00000147935,ENSMUST00000153597,ENSMUST00000155861	nuclear receptor binding SET domain protein 3	234135	Nsd3	-1.19688
ENSMUSG00000024124	ENSMUST00000024936,ENSMUST00000123584,ENSMUST00000135549,ENSMUST00000147626,ENSMUST00000151448,ENSMUST00000234145,ENSMUST00000234765	protease, serine 30	30943	Prss30	-1.19562
ENSMUSG00000056069	ENSMUST00000100739,ENSMUST00000226145,ENSMUST00000226170,ENSMUST00000226581,ENSMUST00000231473,ENSMUST00000232492	OTU deubiquitinase with linear linkage specificity like	223433	Otulinl	-1.19483
ENSMUSG00000016664	ENSMUST00000056177,ENSMUST00000165095,ENSMUST00000171436,ENSMUST00000229337,ENSMUST00000230030,ENSMUST00000230679,ENSMUST00000230816,ENSMUST00000230960,ENSMUST00000231043,ENSMUST00000231184,ENSMUST00000231946	protein kinase C and casein kinase substrate in neurons 2	23970	Pacsin2	-1.19461
ENSMUSG00000029833	ENSMUST00000031859,ENSMUST00000120238,ENSMUST00000120428,ENSMUST00000123007,ENSMUST00000135387,ENSMUST00000149561,ENSMUST00000149828,ENSMUST00000153004	tripartite motif-containing 24	21848	Trim24	-1.1941
ENSMUSG00000022770	ENSMUST00000023454,ENSMUST00000064477,ENSMUST00000100001,ENSMUST00000115196,ENSMUST00000115201,ENSMUST00000115205,ENSMUST00000130920,ENSMUST00000131136,ENSMUST00000132176,ENSMUST00000137322,ENSMUST00000138213,ENSMUST00000140258,ENSMUST00000147382,ENSMUST00000155847,ENSMUST00000155958	discs large MAGUK scaffold protein 1	13383	Dlg1	-1.19345
ENSMUSG00000015214	ENSMUST00000015358,ENSMUST00000114601,ENSMUST00000130179,ENSMUST00000130909,ENSMUST00000132837,ENSMUST00000138565,ENSMUST00000146213,ENSMUST00000149323,ENSMUST00000156307,ENSMUST00000156756	myotubularin related protein 1	53332	Mtmr1	-1.19259
ENSMUSG00000026321	ENSMUST00000027559,ENSMUST00000187658,ENSMUST00000187812	tumor necrosis factor receptor superfamily, member 11a, NFKB activator	21934	Tnfrsf11a	-1.19198
ENSMUSG00000038059	ENSMUST00000042710,ENSMUST00000237270	small integral membrane protein 3	106878	Smim3	-1.19188
ENSMUSG00000007817	ENSMUST00000007961,ENSMUST00000159766,ENSMUST00000160190,ENSMUST00000160229,ENSMUST00000160680,ENSMUST00000161766,ENSMUST00000162546,ENSMUST00000162645	zinc finger, MIZ-type containing 1	328365	Zmiz1	-1.1918
ENSMUSG00000053641	ENSMUST00000038890,ENSMUST00000213437,ENSMUST00000213744,ENSMUST00000213926,ENSMUST00000214001,ENSMUST00000214029,ENSMUST00000215025,ENSMUST00000216098,ENSMUST00000217307	DENN/MADD domain containing 4A	102442	Dennd4a	-1.19059
ENSMUSG00000042535	ENSMUST00000046463,ENSMUST00000228991,ENSMUST00000229046,ENSMUST00000229583,ENSMUST00000230023,ENSMUST00000230262,ENSMUST00000230496,ENSMUST00000230898,ENSMUST00000231095	GTP binding protein 1	14904	Gtpbp1	-1.1893
ENSMUSG00000021831	ENSMUST00000022378,ENSMUST00000227147,ENSMUST00000227315,ENSMUST00000228564,ENSMUST00000228777,ENSMUST00000228836	ERO1-like (S. cerevisiae)	50527	Ero1l	-1.18905
ENSMUSG00000002017	ENSMUST00000112507,ENSMUST00000140729,ENSMUST00000141969,ENSMUST00000234785,ENSMUST00000235026	family with sequence similarity 98, member A	72722	Fam98a	-1.18806
ENSMUSG00000002845	ENSMUST00000002924,ENSMUST00000163133,ENSMUST00000163549,ENSMUST00000163884,ENSMUST00000163948,ENSMUST00000165140,ENSMUST00000165631,ENSMUST00000166235,ENSMUST00000166854,ENSMUST00000167033,ENSMUST00000169554,ENSMUST00000170097,ENSMUST00000171064,ENSMUST00000171687	transmembrane protein 39a	67846	Tmem39a	-1.18732
ENSMUSG00000036712	ENSMUST00000043526,ENSMUST00000098519,ENSMUST00000109626,ENSMUST00000209206,ENSMUST00000209532,ENSMUST00000209559,ENSMUST00000209722,ENSMUST00000209742,ENSMUST00000210302,ENSMUST00000211554,ENSMUST00000211671	CYLD lysine 63 deubiquitinase	74256	Cyld	-1.1869
ENSMUSG00000042446	ENSMUST00000106108,ENSMUST00000123597,ENSMUST00000129028,ENSMUST00000135003,ENSMUST00000150467,ENSMUST00000151026,ENSMUST00000152489,ENSMUST00000152952,ENSMUST00000154821	zinc finger, MYM-type 4	67785	Zmym4	-1.18584
ENSMUSG00000027326	ENSMUST00000028799,ENSMUST00000028802,ENSMUST00000099542,ENSMUST00000152380,ENSMUST00000153300	kinetochore scaffold 1	76464	Knl1	-1.1852
ENSMUSG00000021027	ENSMUST00000085385,ENSMUST00000110687,ENSMUST00000219323,ENSMUST00000219432,ENSMUST00000219451,ENSMUST00000219516,ENSMUST00000219529,ENSMUST00000219542,ENSMUST00000219566,ENSMUST00000220017,ENSMUST00000220367,ENSMUST00000226244	Ral GTPase activating protein, alpha subunit 1	56784	Ralgapa1	-1.18473
ENSMUSG00000023169	ENSMUST00000088452,ENSMUST00000088454,ENSMUST00000100262,ENSMUST00000229253,ENSMUST00000230607,ENSMUST00000230756,ENSMUST00000230767	solute carrier family 38, member 1	105727	Slc38a1	-1.1847
ENSMUSG00000022064	ENSMUST00000022650,ENSMUST00000226935,ENSMUST00000227969,ENSMUST00000228246,ENSMUST00000228279,ENSMUST00000228288,ENSMUST00000228354,ENSMUST00000228598	progesterone immunomodulatory binding factor 1	52023	Pibf1	-1.18361
ENSMUSG00000059409	ENSMUST00000002839,ENSMUST00000233082,ENSMUST00000233757,ENSMUST00000233988	protein phosphatase 2, regulatory subunit B', delta	21770	Ppp2r5d	-1.18361
ENSMUSG00000039841	ENSMUST00000035930,ENSMUST00000115320,ENSMUST00000115321,ENSMUST00000123098,ENSMUST00000155494	zinc finger protein 800	627049	Zfp800	-1.18302
ENSMUSG00000079108	ENSMUST00000164243,ENSMUST00000218879	signal recognition particle 54C	100101806	Srp54c	-1.18282
ENSMUSG00000005034	ENSMUST00000005164,ENSMUST00000102515,ENSMUST00000106137,ENSMUST00000106138,ENSMUST00000144369,ENSMUST00000196344,ENSMUST00000197616,ENSMUST00000199722	protein kinase, cAMP dependent, catalytic, beta	18749	Prkacb	-1.18272
ENSMUSG00000040268	ENSMUST00000048180,ENSMUST00000075181,ENSMUST00000120441,ENSMUST00000126355,ENSMUST00000135359,ENSMUST00000136963,ENSMUST00000140153,ENSMUST00000146111,ENSMUST00000148513,ENSMUST00000149029,ENSMUST00000151119,ENSMUST00000154282	pleckstrin homology domain containing, family A (phosphoinositide binding specific) member 1	101476	Plekha1	-1.18263
ENSMUSG00000006527	ENSMUST00000054230,ENSMUST00000112184,ENSMUST00000227201,ENSMUST00000227303,ENSMUST00000227445,ENSMUST00000228006	Scm-like with four mbt domains 1	54650	Sfmbt1	-1.1824
ENSMUSG00000031600	ENSMUST00000098817,ENSMUST00000238249,ENSMUST00000238339,ENSMUST00000238390,ENSMUST00000238575,ENSMUST00000238624,ENSMUST00000238628	vacuolar protein sorting 37A	52348	Vps37a	-1.18128
ENSMUSG00000022800	ENSMUST00000023489,ENSMUST00000120345,ENSMUST00000125843,ENSMUST00000127493,ENSMUST00000135854,ENSMUST00000137863,ENSMUST00000141590,ENSMUST00000143151,ENSMUST00000145146,ENSMUST00000149183,ENSMUST00000171325,ENSMUST00000231751,ENSMUST00000232272,ENSMUST00000232300	forty-two-three domain containing 1	69823	Fyttd1	-1.18052
ENSMUSG00000002997	ENSMUST00000003079,ENSMUST00000036497,ENSMUST00000146865	protein kinase, cAMP dependent regulatory, type II beta	19088	Prkar2b	-1.18039
ENSMUSG00000031662	ENSMUST00000034087,ENSMUST00000209806	sorting nexin 20	71607	Snx20	-1.18039
ENSMUSG00000020422	ENSMUST00000020695,ENSMUST00000129074,ENSMUST00000131941,ENSMUST00000134823,ENSMUST00000239091,ENSMUST00000239111	tensin 3	319939	Tns3	-1.18036
ENSMUSG00000028059	ENSMUST00000029694,ENSMUST00000107510,ENSMUST00000170653,ENSMUST00000175745,ENSMUST00000175749,ENSMUST00000175779,ENSMUST00000175903,ENSMUST00000175911,ENSMUST00000176079,ENSMUST00000176123,ENSMUST00000176226,ENSMUST00000176243,ENSMUST00000176272,ENSMUST00000176301,ENSMUST00000176307,ENSMUST00000176316,ENSMUST00000176400,ENSMUST00000176401,ENSMUST00000176500,ENSMUST00000176514,ENSMUST00000176528,…	rho/rac guanine nucleotide exchange factor (GEF) 2	16800	Arhgef2	-1.18
ENSMUSG00000058388	ENSMUST00000055425,ENSMUST00000063717,ENSMUST00000090685,ENSMUST00000117150,ENSMUST00000123611,ENSMUST00000130385,ENSMUST00000145727,ENSMUST00000150090,ENSMUST00000150849,ENSMUST00000156262	putative homeodomain transcription factor 1	18685	Phtf1	-1.17675
ENSMUSG00000020894	ENSMUST00000021273,ENSMUST00000117780,ENSMUST00000146847,ENSMUST00000149559,ENSMUST00000149780	vesicle-associated membrane protein 2	22318	Vamp2	-1.17631
ENSMUSG00000029840	ENSMUST00000031866,ENSMUST00000201026	myotrophin	14489	Mtpn	-1.17588
ENSMUSG00000027164	ENSMUST00000004949,ENSMUST00000143341,ENSMUST00000144063	TNF receptor-associated factor 6	22034	Traf6	-1.17542
ENSMUSG00000031393	ENSMUST00000033770,ENSMUST00000100750,ENSMUST00000123362,ENSMUST00000140399,ENSMUST00000170481,ENSMUST00000198358	methyl CpG binding protein 2	17257	Mecp2	-1.17532
ENSMUSG00000057335	ENSMUST00000057037,ENSMUST00000192643,ENSMUST00000192664,ENSMUST00000192927,ENSMUST00000192961,ENSMUST00000192991,ENSMUST00000193098,ENSMUST00000193765,ENSMUST00000194263,ENSMUST00000194371,ENSMUST00000194489,ENSMUST00000194727,ENSMUST00000194984,ENSMUST00000195433,ENSMUST00000195717	centrosomal protein 170	545389	Cep170	-1.17493
ENSMUSG00000038366	ENSMUST00000043843,ENSMUST00000107568,ENSMUST00000107569,ENSMUST00000127033,ENSMUST00000127575,ENSMUST00000129558,ENSMUST00000129828,ENSMUST00000134428,ENSMUST00000136723,ENSMUST00000138919,ENSMUST00000143571,ENSMUST00000146572,ENSMUST00000148280,ENSMUST00000152962,ENSMUST00000153520,ENSMUST00000155762	LIM and SH3 protein 1	16796	Lasp1	-1.17488
ENSMUSG00000038055	ENSMUST00000038281,ENSMUST00000183355,ENSMUST00000184863	dexamethasone-induced transcript	58239	Dexi	-1.17455
ENSMUSG00000031511	ENSMUST00000033908,ENSMUST00000074856,ENSMUST00000098938,ENSMUST00000110904,ENSMUST00000110909,ENSMUST00000151225,ENSMUST00000154204,ENSMUST00000209686,ENSMUST00000210012,ENSMUST00000210104,ENSMUST00000210287,ENSMUST00000211409,ENSMUST00000211510,ENSMUST00000239427	Rho guanine nucleotide exchange factor (GEF7)	54126	Arhgef7	-1.1735
ENSMUSG00000028809	ENSMUST00000030613,ENSMUST00000084846,ENSMUST00000105861,ENSMUST00000131301,ENSMUST00000131373,ENSMUST00000134019,ENSMUST00000134854,ENSMUST00000136342,ENSMUST00000136409,ENSMUST00000136570,ENSMUST00000140050,ENSMUST00000150619,ENSMUST00000151251,ENSMUST00000154788,ENSMUST00000162914	serine/arginine repetitive matrix 1	51796	Srrm1	-1.1734
ENSMUSG00000000861	ENSMUST00000000881,ENSMUST00000109514,ENSMUST00000109516,ENSMUST00000118955,ENSMUST00000124148,ENSMUST00000127494	B cell CLL/lymphoma 11A (zinc finger protein)	14025	Bcl11a	-1.17266
ENSMUSG00000030822	ENSMUST00000033095,ENSMUST00000106292,ENSMUST00000128805,ENSMUST00000132124,ENSMUST00000132819,ENSMUST00000133817,ENSMUST00000133938,ENSMUST00000142532,ENSMUST00000147202,ENSMUST00000206118,ENSMUST00000206915	proline rich 14	233895	Prr14	-1.17177
ENSMUSG00000027957	ENSMUST00000029569,ENSMUST00000120120,ENSMUST00000131082,ENSMUST00000153108,ENSMUST00000169530,ENSMUST00000196331,ENSMUST00000196335	solute carrier family 35 (UDP-N-acetylglucosamine (UDP-GlcNAc) transporter), member 3	229782	Slc35a3	-1.17158
ENSMUSG00000038780	ENSMUST00000085684,ENSMUST00000100461,ENSMUST00000110677,ENSMUST00000126822,ENSMUST00000198621	SMAD specific E3 ubiquitin protein ligase 1	75788	Smurf1	-1.17142
ENSMUSG00000027367	ENSMUST00000110374,ENSMUST00000110375,ENSMUST00000123152,ENSMUST00000125049,ENSMUST00000131196,ENSMUST00000135616,ENSMUST00000144687,ENSMUST00000154549	START domain containing 7	99138	Stard7	-1.17069
ENSMUSG00000032637	ENSMUST00000040202,ENSMUST00000166682,ENSMUST00000167759,ENSMUST00000179818,ENSMUST00000206265,ENSMUST00000206577	ataxin 2-like	233871	Atxn2l	-1.16908
ENSMUSG00000027843	ENSMUST00000029433,ENSMUST00000126548,ENSMUST00000134373,ENSMUST00000146071,ENSMUST00000196385,ENSMUST00000197997,ENSMUST00000198530,ENSMUST00000198701	protein tyrosine phosphatase, non-receptor type 22 (lymphoid)	19260	Ptpn22	-1.1689
ENSMUSG00000025266	ENSMUST00000026297,ENSMUST00000112691,ENSMUST00000124022,ENSMUST00000138026,ENSMUST00000146742,ENSMUST00000154393,ENSMUST00000156233	guanine nucleotide binding protein-like 3 (nucleolar)-like	237107	Gnl3l	-1.16838
ENSMUSG00000026924	ENSMUST00000091252,ENSMUST00000114082,ENSMUST00000148306,ENSMUST00000149010,ENSMUST00000153996,ENSMUST00000154486,ENSMUST00000155252,ENSMUST00000156442	SEC16 homolog A, endoplasmic reticulum export factor	227648	Sec16a	-1.16821
ENSMUSG00000037236	ENSMUST00000166793,ENSMUST00000235199,ENSMUST00000235551,ENSMUST00000235581,ENSMUST00000235769,ENSMUST00000235851,ENSMUST00000235960,ENSMUST00000236276,ENSMUST00000236327,ENSMUST00000236507,ENSMUST00000236860,ENSMUST00000237002,ENSMUST00000237018,ENSMUST00000237061,ENSMUST00000237365,ENSMUST00000237622,ENSMUST00000237744,ENSMUST00000237780	matrin 3	17184	Matr3	-1.16789
ENSMUSG00000035847	ENSMUST00000101509,ENSMUST00000130519	iduronate 2-sulfatase	15931	Ids	-1.16781
ENSMUSG00000021929	ENSMUST00000022496,ENSMUST00000225207	karyopherin (importin) alpha 3	16648	Kpna3	-1.16777
ENSMUSG00000031229	ENSMUST00000101305,ENSMUST00000113573,ENSMUST00000123174,ENSMUST00000126345,ENSMUST00000127221,ENSMUST00000128968,ENSMUST00000130980,ENSMUST00000133543,ENSMUST00000134381,ENSMUST00000134507,ENSMUST00000137453,ENSMUST00000138765,ENSMUST00000141609,ENSMUST00000142235,ENSMUST00000143361,ENSMUST00000146193,ENSMUST00000150914,ENSMUST00000154866,ENSMUST00000155445,ENSMUST00000196998,ENSMUST00000197302,…	ATRX, chromatin remodeler	22589	Atrx	-1.1677
ENSMUSG00000038187	ENSMUST00000047091,ENSMUST00000117577,ENSMUST00000119278,ENSMUST00000129567,ENSMUST00000135510,ENSMUST00000139650	BTB (POZ) domain containing 10	68815	Btbd10	-1.1674
ENSMUSG00000020532	ENSMUST00000020843,ENSMUST00000103201,ENSMUST00000130012,ENSMUST00000133811,ENSMUST00000136463,ENSMUST00000137500,ENSMUST00000183548,ENSMUST00000183887,ENSMUST00000184534	acetyl-Coenzyme A carboxylase alpha	107476	Acaca	-1.1667
ENSMUSG00000027763	ENSMUST00000099087,ENSMUST00000191638,ENSMUST00000191747,ENSMUST00000192086,ENSMUST00000192394,ENSMUST00000192520,ENSMUST00000192607,ENSMUST00000192623,ENSMUST00000192637,ENSMUST00000192757,ENSMUST00000192807,ENSMUST00000193130,ENSMUST00000193175,ENSMUST00000193517,ENSMUST00000193518,ENSMUST00000193647,ENSMUST00000194003,ENSMUST00000194069,ENSMUST00000194201,ENSMUST00000195001,ENSMUST00000195077,…	muscleblind like splicing factor 1	56758	Mbnl1	-1.16539
ENSMUSG00000037242	ENSMUST00000037099,ENSMUST00000143370	chloride intracellular channel 4 (mitochondrial)	29876	Clic4	-1.16457
ENSMUSG00000061313	ENSMUST00000033975,ENSMUST00000209419,ENSMUST00000210777,ENSMUST00000210888,ENSMUST00000211009,ENSMUST00000211688,ENSMUST00000211751	DDHD domain containing 2	72108	Ddhd2	-1.16429
ENSMUSG00000028337	ENSMUST00000030021,ENSMUST00000107756,ENSMUST00000107757,ENSMUST00000127304,ENSMUST00000129121,ENSMUST00000135062,ENSMUST00000139179	coronin, actin binding protein 2A	107684	Coro2a	-1.16392
ENSMUSG00000036943	ENSMUST00000041139	RAB8B, member RAS oncogene family	235442	Rab8b	-1.16375
ENSMUSG00000109336	ENSMUST00000040531,ENSMUST00000207766,ENSMUST00000208126,ENSMUST00000208199,ENSMUST00000208676	sterile alpha motif domain containing 4B	233033	Samd4b	-1.16299
ENSMUSG00000030759	ENSMUST00000033018,ENSMUST00000067929,ENSMUST00000122890,ENSMUST00000123591,ENSMUST00000123845,ENSMUST00000129087,ENSMUST00000136158,ENSMUST00000151133,ENSMUST00000155183,ENSMUST00000156554,ENSMUST00000164745	fatty acyl CoA reductase 1	67420	Far1	-1.16242
ENSMUSG00000030960	ENSMUST00000033257,ENSMUST00000120425,ENSMUST00000135932,ENSMUST00000141920,ENSMUST00000152410,ENSMUST00000154914	EEF1A lysine methyltransferase 2	72096	Eef1akmt2	-1.16174
ENSMUSG00000019806	ENSMUST00000019942,ENSMUST00000105534,ENSMUST00000161729,ENSMUST00000162174,ENSMUST00000162610,ENSMUST00000162798,ENSMUST00000162869	androgen-induced 1	66253	Aig1	-1.16032
ENSMUSG00000049744	ENSMUST00000055776,ENSMUST00000112822,ENSMUST00000112824,ENSMUST00000128630,ENSMUST00000140528	Rho GTPase activating protein 15	76117	Arhgap15	-1.16023
ENSMUSG00000020859	ENSMUST00000024979,ENSMUST00000041956,ENSMUST00000075695,ENSMUST00000092777,ENSMUST00000103168,ENSMUST00000127066,ENSMUST00000132079,ENSMUST00000132605,ENSMUST00000132772,ENSMUST00000138154,ENSMUST00000153076,ENSMUST00000156019	sperm associated antigen 9	70834	Spag9	-1.16022
ENSMUSG00000039157	ENSMUST00000048375,ENSMUST00000133366,ENSMUST00000133512,ENSMUST00000136816,ENSMUST00000147723	family with sequence similarity 102, member A	98952	Fam102a	-1.16
ENSMUSG00000049516	ENSMUST00000061639,ENSMUST00000208588	SPT2, Suppressor of Ty, domain containing 1 (S. cerevisiae)	101685	Spty2d1	-1.15949
ENSMUSG00000036550	ENSMUST00000068452,ENSMUST00000098473,ENSMUST00000211887,ENSMUST00000211937,ENSMUST00000211973,ENSMUST00000212195,ENSMUST00000212228,ENSMUST00000212302,ENSMUST00000212323,ENSMUST00000212340,ENSMUST00000212369,ENSMUST00000212415,ENSMUST00000212535,ENSMUST00000212556,ENSMUST00000212712,ENSMUST00000213006,ENSMUST00000213046	CCR4-NOT transcription complex, subunit 1	234594	Cnot1	-1.15928
ENSMUSG00000041362	ENSMUST00000047511,ENSMUST00000163821,ENSMUST00000237215	shootin 1	71653	Shtn1	-1.15901
ENSMUSG00000034042	ENSMUST00000030460,ENSMUST00000106475,ENSMUST00000131913,ENSMUST00000138837	GC-rich promoter binding protein 1-like 1	77110	Gpbp1l1	-1.15894
ENSMUSG00000027291	ENSMUST00000028752,ENSMUST00000102501,ENSMUST00000126526,ENSMUST00000129857,ENSMUST00000132476,ENSMUST00000133260,ENSMUST00000138854,ENSMUST00000145193,ENSMUST00000147085,ENSMUST00000156296	VPS39 HOPS complex subunit	269338	Vps39	-1.15888
ENSMUSG00000022191	ENSMUST00000090292,ENSMUST00000141010,ENSMUST00000141706,ENSMUST00000147647,ENSMUST00000150211,ENSMUST00000156594,ENSMUST00000169061	drosha, ribonuclease type III	14000	Drosha	-1.1587
ENSMUSG00000018654	ENSMUST00000018798,ENSMUST00000048122,ENSMUST00000065433,ENSMUST00000076700,ENSMUST00000126058,ENSMUST00000141436	IKAROS family zinc finger 1	22778	Ikzf1	-1.15846
ENSMUSG00000040506	ENSMUST00000045699,ENSMUST00000045705,ENSMUST00000099712,ENSMUST00000111316,ENSMUST00000111317,ENSMUST00000124132,ENSMUST00000133490,ENSMUST00000142224,ENSMUST00000156496	autophagy/beclin 1 regulator 1	228361	Ambra1	-1.15837
ENSMUSG00000033943	ENSMUST00000046717,ENSMUST00000079934,ENSMUST00000110773,ENSMUST00000110774,ENSMUST00000122889,ENSMUST00000129405,ENSMUST00000131396,ENSMUST00000132054,ENSMUST00000138851,ENSMUST00000141776,ENSMUST00000150742,ENSMUST00000151074,ENSMUST00000152148,ENSMUST00000156074,ENSMUST00000156510	MAX gene associated	29808	Mga	-1.15749
ENSMUSG00000054280	ENSMUST00000120129,ENSMUST00000130134,ENSMUST00000147752,ENSMUST00000155392	proline rich 14-like	215476	Prr14l	-1.15728
ENSMUSG00000027806	ENSMUST00000099090,ENSMUST00000196049,ENSMUST00000199164,ENSMUST00000199784	TSC22 domain family, member 2	72033	Tsc22d2	-1.15712
ENSMUSG00000031093	ENSMUST00000033419,ENSMUST00000115264,ENSMUST00000115266,ENSMUST00000140175,ENSMUST00000145757	dedicator of cytokinesis 11	75974	Dock11	-1.15688
ENSMUSG00000016487	ENSMUST00000016631,ENSMUST00000111623,ENSMUST00000123902,ENSMUST00000126774,ENSMUST00000133825,ENSMUST00000136837,ENSMUST00000149203,ENSMUST00000154221,ENSMUST00000155415,ENSMUST00000203730,ENSMUST00000204028,ENSMUST00000204660	PTPRF interacting protein, binding protein 1 (liprin beta 1)	67533	Ppfibp1	-1.15664
ENSMUSG00000033075	ENSMUST00000044189,ENSMUST00000180461,ENSMUST00000180531,ENSMUST00000180657,ENSMUST00000180716,ENSMUST00000181349,ENSMUST00000181855,ENSMUST00000182611,ENSMUST00000183105	SUMO1/sentrin specific peptidase 1	223870	Senp1	-1.15655
ENSMUSG00000024986	ENSMUST00000025944,ENSMUST00000128184,ENSMUST00000237452	hematopoietically expressed homeobox	15242	Hhex	-1.15564
ENSMUSG00000037674	ENSMUST00000093820,ENSMUST00000163401,ENSMUST00000183372,ENSMUST00000183601,ENSMUST00000184015,ENSMUST00000184851,ENSMUST00000185177	regulatory factor X, 7	319758	Rfx7	-1.15561
ENSMUSG00000000420	ENSMUST00000000430,ENSMUST00000164066,ENSMUST00000164998,ENSMUST00000169474,ENSMUST00000170191,ENSMUST00000170243,ENSMUST00000171583,ENSMUST00000178605	polypeptide N-acetylgalactosaminyltransferase 1	14423	Galnt1	-1.15432
ENSMUSG00000022772	ENSMUST00000023457,ENSMUST00000129900,ENSMUST00000144320,ENSMUST00000155515,ENSMUST00000231360	SUMO/sentrin specific peptidase 5	320213	Senp5	-1.15426
ENSMUSG00000002981	ENSMUST00000055242,ENSMUST00000207704,ENSMUST00000208174,ENSMUST00000208215,ENSMUST00000208554,ENSMUST00000208594,ENSMUST00000208599,ENSMUST00000208846,ENSMUST00000208868	cleft lip and palate associated transmembrane protein 1	56457	Clptm1	-1.1538
ENSMUSG00000032462	ENSMUST00000035037,ENSMUST00000124723,ENSMUST00000136965	phosphatidylinositol-4,5-bisphosphate 3-kinase catalytic subunit beta	74769	Pik3cb	-1.15372
ENSMUSG00000029772	ENSMUST00000064872,ENSMUST00000102995,ENSMUST00000115238,ENSMUST00000115242,ENSMUST00000125911,ENSMUST00000128837,ENSMUST00000128927,ENSMUST00000134438,ENSMUST00000135396,ENSMUST00000136031,ENSMUST00000138205,ENSMUST00000141304,ENSMUST00000143091,ENSMUST00000143707,ENSMUST00000149816,ENSMUST00000150365,ENSMUST00000152581,ENSMUST00000154079,ENSMUST00000176265,ENSMUST00000176693,ENSMUST00000201020,…	S-adenosylhomocysteine hydrolase-like 2	74340	Ahcyl2	-1.15319
ENSMUSG00000022504	ENSMUST00000023147,ENSMUST00000229906,ENSMUST00000230146,ENSMUST00000230392,ENSMUST00000230395,ENSMUST00000230450,ENSMUST00000230533,ENSMUST00000230892	class II transactivator	12265	Ciita	-1.15254
ENSMUSG00000029823	ENSMUST00000057692,ENSMUST00000159936,ENSMUST00000160430,ENSMUST00000160511,ENSMUST00000160582,ENSMUST00000160922,ENSMUST00000161227,ENSMUST00000161538,ENSMUST00000162386,ENSMUST00000162530,ENSMUST00000162718,ENSMUST00000163012,ENSMUST00000163047	LUC7-like 2 (S. cerevisiae)	192196	Luc7l2	-1.1525
ENSMUSG00000022195	ENSMUST00000057256,ENSMUST00000227299,ENSMUST00000227821,ENSMUST00000228177,ENSMUST00000228888	RIKEN cDNA 6030458C11 gene	77877	6030458C11Rik	-1.15129
ENSMUSG00000034210	ENSMUST00000074425,ENSMUST00000106522,ENSMUST00000106524,ENSMUST00000106525,ENSMUST00000132306,ENSMUST00000136593,ENSMUST00000141927	EF-hand calcium binding domain 14	230648	Efcab14	-1.14899
ENSMUSG00000036087	ENSMUST00000143829,ENSMUST00000144843,ENSMUST00000145939,ENSMUST00000183284,ENSMUST00000200785	SLAIN motif family, member 2	75991	Slain2	-1.14881
ENSMUSG00000030774	ENSMUST00000033040,ENSMUST00000156637,ENSMUST00000205757,ENSMUST00000206351,ENSMUST00000206984,ENSMUST00000207017	p21 (RAC1) activated kinase 1	18479	Pak1	-1.14861
ENSMUSG00000056211	ENSMUST00000036288,ENSMUST00000185389,ENSMUST00000185471,ENSMUST00000185853,ENSMUST00000187023,ENSMUST00000187557,ENSMUST00000187605,ENSMUST00000187900,ENSMUST00000188381,ENSMUST00000188570,ENSMUST00000189317,ENSMUST00000189982,ENSMUST00000190056,ENSMUST00000190288,ENSMUST00000191016,ENSMUST00000191274	R3H domain containing 1	226412	R3hdm1	-1.14445
ENSMUSG00000020152	ENSMUST00000000137,ENSMUST00000132022,ENSMUST00000134779	ARP2 actin-related protein 2	66713	Actr2	-1.14435
ENSMUSG00000017485	ENSMUST00000017629,ENSMUST00000159302,ENSMUST00000159987,ENSMUST00000160501,ENSMUST00000161693,ENSMUST00000163032,ENSMUST00000224460,ENSMUST00000224695	topoisomerase (DNA) II beta	21974	Top2b	-1.14406
ENSMUSG00000027479	ENSMUST00000028981,ENSMUST00000123570,ENSMUST00000123795	microtubule-associated protein, RP/EB family, member 1	13589	Mapre1	-1.14405
ENSMUSG00000031133	ENSMUST00000033468,ENSMUST00000114735,ENSMUST00000134028,ENSMUST00000135098,ENSMUST00000151768,ENSMUST00000175636,ENSMUST00000175900,ENSMUST00000176986	Rac/Cdc42 guanine nucleotide exchange factor (GEF) 6	73341	Arhgef6	-1.14371
ENSMUSG00000025982	ENSMUST00000027127,ENSMUST00000185429,ENSMUST00000187500,ENSMUST00000188419,ENSMUST00000188859,ENSMUST00000189051,ENSMUST00000190175,ENSMUST00000191303	splicing factor 3b, subunit 1	81898	Sf3b1	-1.14363
ENSMUSG00000026510	ENSMUST00000117245,ENSMUST00000191626,ENSMUST00000191804	transformation related protein 53 binding protein 2	209456	Trp53bp2	-1.14356
ENSMUSG00000028894	ENSMUST00000094782,ENSMUST00000135971,ENSMUST00000142446,ENSMUST00000142652,ENSMUST00000145359,ENSMUST00000153837,ENSMUST00000154229,ENSMUST00000184454	inositol polyphosphate-5-phosphatase B	16330	Inpp5b	-1.14338
ENSMUSG00000031601	ENSMUST00000034012,ENSMUST00000128237,ENSMUST00000132032,ENSMUST00000132200,ENSMUST00000132740,ENSMUST00000135269,ENSMUST00000139558,ENSMUST00000142455,ENSMUST00000144970,ENSMUST00000146280,ENSMUST00000149992	CCR4-NOT transcription complex, subunit 7	18983	Cnot7	-1.14239
ENSMUSG00000028245	ENSMUST00000029910,ENSMUST00000124344,ENSMUST00000124656,ENSMUST00000143566,ENSMUST00000143704,ENSMUST00000143983,ENSMUST00000145399,ENSMUST00000149015,ENSMUST00000156078,ENSMUST00000156283,ENSMUST00000156715	neutral sphingomyelinase (N-SMase) activation associated factor	18201	Nsmaf	-1.14235
ENSMUSG00000046432	ENSMUST00000053540,ENSMUST00000113112,ENSMUST00000113113,ENSMUST00000178632	brain expressed X-linked 3	12070	Bex3	-1.14226
ENSMUSG00000041870	ENSMUST00000102578,ENSMUST00000129001,ENSMUST00000131803,ENSMUST00000137519,ENSMUST00000140604,ENSMUST00000200704	ankyrin repeat domain 13a	68420	Ankrd13a	-1.1422
ENSMUSG00000022607	ENSMUST00000110036,ENSMUST00000226454,ENSMUST00000226466,ENSMUST00000226742,ENSMUST00000226791,ENSMUST00000226848,ENSMUST00000226893,ENSMUST00000226988,ENSMUST00000227395,ENSMUST00000227435,ENSMUST00000227569,ENSMUST00000227686,ENSMUST00000228180,ENSMUST00000228457,ENSMUST00000228628,ENSMUST00000239146	PTK2 protein tyrosine kinase 2	14083	Ptk2	-1.14215
ENSMUSG00000001855	ENSMUST00000065398,ENSMUST00000123062,ENSMUST00000124455,ENSMUST00000126301,ENSMUST00000129496,ENSMUST00000130185,ENSMUST00000130975,ENSMUST00000138012,ENSMUST00000146138,ENSMUST00000152791,ENSMUST00000153096	nucleoporin 214	227720	Nup214	-1.14213
ENSMUSG00000106864	ENSMUST00000088010,ENSMUST00000200871,ENSMUST00000201087,ENSMUST00000201423,ENSMUST00000201428,ENSMUST00000201468,ENSMUST00000202218,ENSMUST00000202254,ENSMUST00000202300,ENSMUST00000202639,ENSMUST00000202843	general transcription factor IIIC, polypeptide 2, beta	71752	Gtf3c2	-1.14192
ENSMUSG00000068015	ENSMUST00000088970,ENSMUST00000226799,ENSMUST00000227433,ENSMUST00000228134,ENSMUST00000228252,ENSMUST00000229311,ENSMUST00000230218,ENSMUST00000230381	leucine-rich repeats and calponin homology (CH) domain containing 1	380916	Lrch1	-1.14117
ENSMUSG00000114797	ENSMUST00000041905,ENSMUST00000223596,ENSMUST00000223713,ENSMUST00000224575,ENSMUST00000225111,ENSMUST00000225311,ENSMUST00000225572	NA	NA	Gm49336	-1.14111
ENSMUSG00000019866	ENSMUST00000020017,ENSMUST00000200401,ENSMUST00000239010	crystallin beta-gamma domain containing 1	11630	Crybg1	-1.14074
ENSMUSG00000035851	ENSMUST00000038384,ENSMUST00000119339,ENSMUST00000120498,ENSMUST00000123625,ENSMUST00000124123,ENSMUST00000148142,ENSMUST00000151489,ENSMUST00000156363,ENSMUST00000198167	YTH domain containing 1	231386	Ythdc1	-1.14025
ENSMUSG00000021824	ENSMUST00000022371,ENSMUST00000126536,ENSMUST00000130291,ENSMUST00000130370,ENSMUST00000148886,ENSMUST00000154460,ENSMUST00000156716,ENSMUST00000224016	adaptor-related protein complex 3, mu 1 subunit	55946	Ap3m1	-1.13982
ENSMUSG00000003348	ENSMUST00000003438,ENSMUST00000218090,ENSMUST00000218439,ENSMUST00000220138	MOB kinase activator 3A	208228	Mob3a	-1.13915
ENSMUSG00000021189	ENSMUST00000021606,ENSMUST00000159883,ENSMUST00000160186,ENSMUST00000160251,ENSMUST00000161011	ataxin 3	110616	Atxn3	-1.13898
ENSMUSG00000024293	ENSMUST00000025142,ENSMUST00000097670,ENSMUST00000115864,ENSMUST00000127099,ENSMUST00000145320,ENSMUST00000234090,ENSMUST00000234151,ENSMUST00000234347,ENSMUST00000234550	establishment of sister chromatid cohesion N-acetyltransferase 1	77805	Esco1	-1.13897
ENSMUSG00000032366	ENSMUST00000030185,ENSMUST00000034928,ENSMUST00000050905,ENSMUST00000113684,ENSMUST00000113685,ENSMUST00000113686,ENSMUST00000113687,ENSMUST00000113689,ENSMUST00000113690,ENSMUST00000113693,ENSMUST00000113695,ENSMUST00000113696,ENSMUST00000113697,ENSMUST00000113701,ENSMUST00000113705,ENSMUST00000113707,ENSMUST00000129466,ENSMUST00000129733,ENSMUST00000131279,ENSMUST00000139046,ENSMUST00000156899	tropomyosin 1, alpha	22003	Tpm1	-1.13897
ENSMUSG00000057637	ENSMUST00000105778,ENSMUST00000134791,ENSMUST00000154280,ENSMUST00000156909	PR domain containing 2, with ZNF domain	110593	Prdm2	-1.13834
ENSMUSG00000040383	ENSMUST00000043160,ENSMUST00000102543,ENSMUST00000125460,ENSMUST00000126701,ENSMUST00000129504,ENSMUST00000131785,ENSMUST00000140441,ENSMUST00000147191,ENSMUST00000154317	aquarius	11834	Aqr	-1.13807
ENSMUSG00000036109	ENSMUST00000041495,ENSMUST00000114875,ENSMUST00000114876,ENSMUST00000136404,ENSMUST00000148116,ENSMUST00000150014,ENSMUST00000156028	muscleblind like splicing factor 3	171170	Mbnl3	-1.13762
ENSMUSG00000042520	ENSMUST00000029553,ENSMUST00000064639,ENSMUST00000090908,ENSMUST00000195995,ENSMUST00000196568,ENSMUST00000196633,ENSMUST00000196747,ENSMUST00000196843,ENSMUST00000196917,ENSMUST00000196952,ENSMUST00000197177,ENSMUST00000197633,ENSMUST00000197903,ENSMUST00000198282,ENSMUST00000198322,ENSMUST00000199016,ENSMUST00000199050,ENSMUST00000199301,ENSMUST00000199612,ENSMUST00000199834,ENSMUST00000199929,…	ubiquitin-associated protein 2-like	74383	Ubap2l	-1.13727
ENSMUSG00000020280	ENSMUST00000020520,ENSMUST00000058163,ENSMUST00000109525,ENSMUST00000136365,ENSMUST00000139646,ENSMUST00000142287,ENSMUST00000143117	pseudouridylate synthase 10	74467	Pus10	-1.1369
ENSMUSG00000036202	ENSMUST00000112693,ENSMUST00000125116,ENSMUST00000125322,ENSMUST00000125376,ENSMUST00000126218,ENSMUST00000145130,ENSMUST00000152178	replication timing regulatory factor 1	51869	Rif1	-1.13645
ENSMUSG00000035596	ENSMUST00000038608,ENSMUST00000118710,ENSMUST00000127106,ENSMUST00000128364,ENSMUST00000131688,ENSMUST00000133223,ENSMUST00000150684,ENSMUST00000150785,ENSMUST00000205644,ENSMUST00000206343,ENSMUST00000206379,ENSMUST00000206448,ENSMUST00000206571	membrane bound O-acyltransferase domain containing 7	77582	Mboat7	-1.13626
ENSMUSG00000037400	ENSMUST00000029257,ENSMUST00000196409,ENSMUST00000196700,ENSMUST00000196965,ENSMUST00000197003,ENSMUST00000197764,ENSMUST00000198599,ENSMUST00000199892,ENSMUST00000200351,ENSMUST00000200445,ENSMUST00000211902	ATPase, class VI, type 11B	76295	Atp11b	-1.13579
ENSMUSG00000005686	ENSMUST00000005829,ENSMUST00000106686,ENSMUST00000143786,ENSMUST00000147587,ENSMUST00000148292,ENSMUST00000170374,ENSMUST00000176487,ENSMUST00000213373	adenosine monophosphate deaminase 3	11717	Ampd3	-1.13505
ENSMUSG00000026516	ENSMUST00000027797,ENSMUST00000191721,ENSMUST00000191728,ENSMUST00000193758,ENSMUST00000195209	nuclear VCP-like	67459	Nvl	-1.1346
ENSMUSG00000039000	ENSMUST00000049453,ENSMUST00000197193,ENSMUST00000197953,ENSMUST00000199032,ENSMUST00000199598	ubiquitin protein ligase E3C	100763	Ube3c	-1.13422
ENSMUSG00000065954	ENSMUST00000084030,ENSMUST00000084512,ENSMUST00000209441,ENSMUST00000209633,ENSMUST00000209827,ENSMUST00000210016,ENSMUST00000210488,ENSMUST00000210645,ENSMUST00000210767,ENSMUST00000210933,ENSMUST00000211218,ENSMUST00000211584,ENSMUST00000211622	transforming, acidic coiled-coil containing protein 1	320165	Tacc1	-1.13399
ENSMUSG00000001034	ENSMUST00000079080,ENSMUST00000101085,ENSMUST00000108714,ENSMUST00000123360,ENSMUST00000125840,ENSMUST00000126495,ENSMUST00000128478,ENSMUST00000129272,ENSMUST00000135521,ENSMUST00000139663,ENSMUST00000139932,ENSMUST00000140779,ENSMUST00000152755,ENSMUST00000153441	mitogen-activated protein kinase 7	23939	Mapk7	-1.13359
ENSMUSG00000021254	ENSMUST00000071106,ENSMUST00000220646,ENSMUST00000220810,ENSMUST00000221368,ENSMUST00000222299	G patch domain containing 2 like	70373	Gpatch2l	-1.13342
ENSMUSG00000025862	ENSMUST00000069619,ENSMUST00000115072,ENSMUST00000115073,ENSMUST00000123245,ENSMUST00000127618,ENSMUST00000128799,ENSMUST00000136323,ENSMUST00000141414	stromal antigen 2	20843	Stag2	-1.13337
ENSMUSG00000039191	ENSMUST00000037618,ENSMUST00000087360,ENSMUST00000113865,ENSMUST00000200856,ENSMUST00000201701,ENSMUST00000201721,ENSMUST00000201883,ENSMUST00000201912,ENSMUST00000201928,ENSMUST00000201991,ENSMUST00000202092,ENSMUST00000202476	recombination signal binding protein for immunoglobulin kappa J region	19664	Rbpj	-1.13301
ENSMUSG00000040620	ENSMUST00000049048,ENSMUST00000108527,ENSMUST00000123860,ENSMUST00000124464,ENSMUST00000146203,ENSMUST00000155044,ENSMUST00000178111,ENSMUST00000178218,ENSMUST00000179635	DEAH (Asp-Glu-Ala-His) box polypeptide 33	216877	Dhx33	-1.1327
ENSMUSG00000036046	ENSMUST00000047144,ENSMUST00000124308,ENSMUST00000165743,ENSMUST00000170863	RIKEN cDNA 5031439G07 gene	223739	5031439G07Rik	-1.13231
ENSMUSG00000034152	ENSMUST00000035934,ENSMUST00000220548,ENSMUST00000220679,ENSMUST00000222213,ENSMUST00000222248,ENSMUST00000223045	exocyst complex component 3	211446	Exoc3	-1.13206
ENSMUSG00000037475	ENSMUST00000047037,ENSMUST00000123512,ENSMUST00000124458,ENSMUST00000127338,ENSMUST00000129915,ENSMUST00000130993,ENSMUST00000131259,ENSMUST00000134084,ENSMUST00000143557,ENSMUST00000145586,ENSMUST00000150443,ENSMUST00000151430,ENSMUST00000151454,ENSMUST00000151802,ENSMUST00000152921,ENSMUST00000155369	THO complex 2	331401	Thoc2	-1.13183
ENSMUSG00000020946	ENSMUST00000021329,ENSMUST00000107013,ENSMUST00000145265	golgi SNAP receptor complex member 2	56494	Gosr2	-1.13165
ENSMUSG00000035021	ENSMUST00000038926,ENSMUST00000172875,ENSMUST00000173176,ENSMUST00000173177,ENSMUST00000173433,ENSMUST00000173453,ENSMUST00000173529,ENSMUST00000174225	bromodomain adjacent to zinc finger domain 1A	217578	Baz1a	-1.13022
ENSMUSG00000038827	ENSMUST00000045368,ENSMUST00000131520,ENSMUST00000147763,ENSMUST00000152638	actin binding transcription modulator	230234	Abitram	-1.13008
ENSMUSG00000025915	ENSMUST00000097826,ENSMUST00000166384,ENSMUST00000168907,ENSMUST00000171265,ENSMUST00000188298,ENSMUST00000188486,ENSMUST00000188625,ENSMUST00000188738,ENSMUST00000188782,ENSMUST00000188830,ENSMUST00000189050,ENSMUST00000191338	serum/glucocorticoid regulated kinase 3	170755	Sgk3	-1.13008
ENSMUSG00000032096	ENSMUST00000034607,ENSMUST00000125164,ENSMUST00000150160,ENSMUST00000215140,ENSMUST00000217194,ENSMUST00000217199	archain 1	213827	Arcn1	-1.12945
ENSMUSG00000022781	ENSMUST00000023467,ENSMUST00000125019	p21 (RAC1) activated kinase 2	224105	Pak2	-1.1294
ENSMUSG00000024949	ENSMUST00000113485,ENSMUST00000113487,ENSMUST00000113488,ENSMUST00000113489,ENSMUST00000124667,ENSMUST00000125516,ENSMUST00000131083,ENSMUST00000131252,ENSMUST00000131677,ENSMUST00000144239,ENSMUST00000144409,ENSMUST00000146298,ENSMUST00000154260,ENSMUST00000155973,ENSMUST00000162237	splicing factor 1	22668	Sf1	-1.129
ENSMUSG00000073079	ENSMUST00000021407,ENSMUST00000220578,ENSMUST00000221479,ENSMUST00000221655,ENSMUST00000222027,ENSMUST00000223111	signal recognition particle 54A	24067	Srp54a	-1.12539
ENSMUSG00000034342	ENSMUST00000037644,ENSMUST00000205313,ENSMUST00000205755,ENSMUST00000205968,ENSMUST00000206125,ENSMUST00000206147,ENSMUST00000206163,ENSMUST00000206258,ENSMUST00000206540,ENSMUST00000206629,ENSMUST00000206720	Casitas B-lineage lymphoma	12402	Cbl	-1.12505
ENSMUSG00000056579	ENSMUST00000132077,ENSMUST00000144852,ENSMUST00000153313,ENSMUST00000182330,ENSMUST00000193809,ENSMUST00000226545,ENSMUST00000226724,ENSMUST00000227137	taurine upregulated gene 1	544752	Tug1	-1.12416
ENSMUSG00000025224	ENSMUST00000026254,ENSMUST00000175706,ENSMUST00000175747,ENSMUST00000175868,ENSMUST00000175878,ENSMUST00000176046,ENSMUST00000176355,ENSMUST00000176422,ENSMUST00000176525,ENSMUST00000176574,ENSMUST00000176576,ENSMUST00000176853,ENSMUST00000176992,ENSMUST00000177406,ENSMUST00000177512,ENSMUST00000236167	golgi-specific brefeldin A-resistance factor 1	107338	Gbf1	-1.12387
ENSMUSG00000034867	ENSMUST00000040844,ENSMUST00000186245,ENSMUST00000187567,ENSMUST00000187807,ENSMUST00000188906,ENSMUST00000190503,ENSMUST00000205801,ENSMUST00000206157,ENSMUST00000206472,ENSMUST00000206632	ankyrin repeat domain 27 (VPS9 domain)	245886	Ankrd27	-1.1238
ENSMUSG00000021427	ENSMUST00000021864,ENSMUST00000224399,ENSMUST00000225246,ENSMUST00000225319	signal sequence receptor, alpha	107513	Ssr1	-1.12347
ENSMUSG00000061288	ENSMUST00000092889,ENSMUST00000111975,ENSMUST00000111978,ENSMUST00000125738,ENSMUST00000126813,ENSMUST00000127814,ENSMUST00000128720,ENSMUST00000145640,ENSMUST00000153709,ENSMUST00000179276	TAO kinase 3	330177	Taok3	-1.12309
ENSMUSG00000029528	ENSMUST00000067268,ENSMUST00000086523,ENSMUST00000125007,ENSMUST00000125054,ENSMUST00000129897,ENSMUST00000134198,ENSMUST00000137716,ENSMUST00000138139,ENSMUST00000139834,ENSMUST00000152156,ENSMUST00000153682,ENSMUST00000157050,ENSMUST00000202564,ENSMUST00000212819	paxillin	19303	Pxn	-1.12204
ENSMUSG00000035941	ENSMUST00000039213,ENSMUST00000185353,ENSMUST00000186322,ENSMUST00000186447,ENSMUST00000187521,ENSMUST00000188768	inhibitor of Bruton agammaglobulinemia tyrosine kinase	108837	Ibtk	-1.12198
ENSMUSG00000059263	ENSMUST00000106653,ENSMUST00000210309,ENSMUST00000210526,ENSMUST00000210591,ENSMUST00000211791,ENSMUST00000215510	ubiquitin specific peptidase 47	74996	Usp47	-1.121
ENSMUSG00000018209	ENSMUST00000018353,ENSMUST00000088291,ENSMUST00000134078,ENSMUST00000137866,ENSMUST00000153319	serine/threonine kinase 4	58231	Stk4	-1.11967
ENSMUSG00000034163	ENSMUST00000036044,ENSMUST00000127283,ENSMUST00000141246,ENSMUST00000143751	zinc finger, C3H1-type containing	216345	Zfc3h1	-1.11891
ENSMUSG00000006362	ENSMUST00000006525,ENSMUST00000064674,ENSMUST00000127984,ENSMUST00000134045,ENSMUST00000142535,ENSMUST00000147374,ENSMUST00000148630	CBFA2/RUNX1 translocation partner 3	12398	Cbfa2t3	-1.11782
ENSMUSG00000018765	ENSMUST00000018909,ENSMUST00000125586,ENSMUST00000125989,ENSMUST00000132742,ENSMUST00000139605,ENSMUST00000155513	fragile X mental retardation, autosomal homolog 2	23879	Fxr2	-1.11752
ENSMUSG00000028926	ENSMUST00000030763,ENSMUST00000115450,ENSMUST00000115451,ENSMUST00000115452,ENSMUST00000131392,ENSMUST00000132390,ENSMUST00000133465,ENSMUST00000134867,ENSMUST00000137554,ENSMUST00000153331,ENSMUST00000156660,ENSMUST00000167567,ENSMUST00000171119,ENSMUST00000199623,ENSMUST00000200637	cyclin-dependent kinase 14	18647	Cdk14	-1.11636
ENSMUSG00000015133	ENSMUST00000015277,ENSMUST00000130438,ENSMUST00000131239,ENSMUST00000137181,ENSMUST00000145954,ENSMUST00000154893,ENSMUST00000167705	leucine-rich repeat kinase 1	233328	Lrrk1	-1.1162
ENSMUSG00000030753	ENSMUST00000033009,ENSMUST00000126356,ENSMUST00000146473,ENSMUST00000153566	THAP domain containing 12	72981	Thap12	-1.11518
ENSMUSG00000024283	ENSMUST00000074919,ENSMUST00000092112,ENSMUST00000165572,ENSMUST00000165854,ENSMUST00000166062,ENSMUST00000166378,ENSMUST00000167020,ENSMUST00000167057,ENSMUST00000167542,ENSMUST00000168446,ENSMUST00000169010,ENSMUST00000170854,ENSMUST00000170932,ENSMUST00000171042,ENSMUST00000171486,ENSMUST00000172018	WW domain containing adaptor with coiled-coil	225131	Wac	-1.11515
ENSMUSG00000024811	ENSMUST00000025729,ENSMUST00000164665,ENSMUST00000166677,ENSMUST00000167533,ENSMUST00000167724,ENSMUST00000168654,ENSMUST00000168656,ENSMUST00000168718,ENSMUST00000168973	tankyrase, TRF1-interacting ankyrin-related ADP-ribose polymerase 2	74493	Tnks2	-1.11005
ENSMUSG00000052296	ENSMUST00000064099,ENSMUST00000205374,ENSMUST00000206391,ENSMUST00000206532,ENSMUST00000206768,ENSMUST00000206966	protein phosphatase 6, regulatory subunit 1	243819	Ppp6r1	-1.10699
ENSMUSG00000021339	ENSMUST00000021772,ENSMUST00000224170,ENSMUST00000224894,ENSMUST00000225296	MRS2 magnesium transporter	380836	Mrs2	-1.10636
ENSMUSG00000028953	ENSMUST00000030795	ATP-binding cassette, sub-family F (GCN20), member 2	27407	Abcf2	-1.10184
ENSMUSG00000034595	ENSMUST00000113814,ENSMUST00000122899,ENSMUST00000127442,ENSMUST00000144382,ENSMUST00000187690,ENSMUST00000190496	protein phosphatase 1, regulatory subunit 18	76448	Ppp1r18	-1.10004
ENSMUSG00000018322	ENSMUST00000018466,ENSMUST00000109384,ENSMUST00000132602	translocase of outer mitochondrial membrane 34	67145	Tomm34	-1.09748
ENSMUSG00000048865	ENSMUST00000056449,ENSMUST00000131607,ENSMUST00000135312,ENSMUST00000194914	Rho GTPase activating protein 30	226652	Arhgap30	-1.09431
ENSMUSG00000052298	ENSMUST00000064104,ENSMUST00000123424,ENSMUST00000135903,ENSMUST00000136059,ENSMUST00000153209	CDC42 small effector 2	72729	Cdc42se2	-1.09136
ENSMUSG00000032504	ENSMUST00000035086,ENSMUST00000111861,ENSMUST00000135545,ENSMUST00000137104,ENSMUST00000142256,ENSMUST00000156425	programmed cell death 6 interacting protein	18571	Pdcd6ip	-1.08698
ENSMUSG00000068823	ENSMUST00000029446,ENSMUST00000195889,ENSMUST00000196521,ENSMUST00000196685,ENSMUST00000197154,ENSMUST00000197488,ENSMUST00000197827,ENSMUST00000197844,ENSMUST00000197939,ENSMUST00000198174,ENSMUST00000198180,ENSMUST00000198906,ENSMUST00000198944,ENSMUST00000199240,ENSMUST00000199420,ENSMUST00000199571,ENSMUST00000200617	cold shock domain containing E1, RNA binding	229663	Csde1	-1.08452
ENSMUSG00000028382	ENSMUST00000030076,ENSMUST00000102883,ENSMUST00000134879,ENSMUST00000140925,ENSMUST00000148331,ENSMUST00000151313,ENSMUST00000172471,ENSMUST00000172768,ENSMUST00000173268,ENSMUST00000173699,ENSMUST00000173884,ENSMUST00000174586,ENSMUST00000174748	polypyrimidine tract binding protein 3	230257	Ptbp3	-1.08033
ENSMUSG00000020515	ENSMUST00000020822,ENSMUST00000108843,ENSMUST00000133923,ENSMUST00000134896	CCR4-NOT transcription complex, subunit 8	69125	Cnot8	1.07526
ENSMUSG00000037152	ENSMUST00000038108,ENSMUST00000135602,ENSMUST00000145572,ENSMUST00000193279	NADH:ubiquinone oxidoreductase subunit C1	66377	Ndufc1	1.08619
ENSMUSG00000037601	ENSMUST00000021220,ENSMUST00000107844,ENSMUST00000135884	NME/NM23 nucleoside diphosphate kinase 1	18102	Nme1	1.09497
ENSMUSG00000028692	ENSMUST00000030455,ENSMUST00000126146,ENSMUST00000128010,ENSMUST00000128059	aldo-keto reductase family 1, member A1 (aldehyde reductase)	58810	Akr1a1	1.09666
ENSMUSG00000025144	ENSMUST00000026137,ENSMUST00000055424,ENSMUST00000106154,ENSMUST00000106155,ENSMUST00000128543	centromere protein X	20892	Cenpx	1.10476
ENSMUSG00000023456	ENSMUST00000133251,ENSMUST00000139716,ENSMUST00000149610,ENSMUST00000154883,ENSMUST00000172132,ENSMUST00000204602,ENSMUST00000239432	triosephosphate isomerase 1	21991	Tpi1	1.11197
ENSMUSG00000070493	ENSMUST00000094280,ENSMUST00000131645	coiled-coil-helix-coiled-coil-helix domain containing 2	14004	Chchd2	1.11461
ENSMUSG00000060803	ENSMUST00000169613,ENSMUST00000235711,ENSMUST00000236211,ENSMUST00000236311,ENSMUST00000237239,ENSMUST00000237273,ENSMUST00000237773,ENSMUST00000237893,ENSMUST00000237982	glutathione S-transferase, pi 1	14870	Gstp1	1.11474
ENSMUSG00000000827	ENSMUST00000000844,ENSMUST00000069712,ENSMUST00000108799,ENSMUST00000108800,ENSMUST00000129390,ENSMUST00000130261,ENSMUST00000141825,ENSMUST00000149163,ENSMUST00000155589,ENSMUST00000183956,ENSMUST00000184588,ENSMUST00000184849	tumor protein D52-like 2	66314	Tpd52l2	1.11511
ENSMUSG00000005161	ENSMUST00000005292,ENSMUST00000109733,ENSMUST00000109734,ENSMUST00000125893,ENSMUST00000127215,ENSMUST00000138748,ENSMUST00000143402,ENSMUST00000164807	peroxiredoxin 2	21672	Prdx2	1.11526
ENSMUSG00000027628	ENSMUST00000029158,ENSMUST00000109570,ENSMUST00000126250,ENSMUST00000137928,ENSMUST00000150212	AAR2 splicing factor homolog	68295	Aar2	1.11588
ENSMUSG00000075279	ENSMUST00000173086	mitichondrial ribosomal protein L23, pseudogene 1	NA	Mrpl23-ps1	1.11745
ENSMUSG00000020091	ENSMUST00000020288,ENSMUST00000167087	eukaryotic translation initiation factor 4E binding protein 2	13688	Eif4ebp2	1.11782
ENSMUSG00000074886	ENSMUST00000001115,ENSMUST00000099482,ENSMUST00000224118,ENSMUST00000224532,ENSMUST00000224653,ENSMUST00000224995,ENSMUST00000225925	G protein-coupled receptor kinase 6	26385	Grk6	1.11792
ENSMUSG00000003308	ENSMUST00000049567,ENSMUST00000164812,ENSMUST00000193247,ENSMUST00000193982,ENSMUST00000194542,ENSMUST00000216436	kelch-like ECH-associated protein 1	50868	Keap1	1.11848
ENSMUSG00000038503	ENSMUST00000094215,ENSMUST00000130103,ENSMUST00000138803,ENSMUST00000153377,ENSMUST00000207373	mesoderm development LRP chaperone	67943	Mesd	1.11934
ENSMUSG00000047045	ENSMUST00000087333,ENSMUST00000101198,ENSMUST00000112888,ENSMUST00000112889,ENSMUST00000112891,ENSMUST00000112896,ENSMUST00000124211,ENSMUST00000133634,ENSMUST00000151914	transmembrane protein 164	209497	Tmem164	1.1202
ENSMUSG00000020153	ENSMUST00000020361,ENSMUST00000105364,ENSMUST00000152939,ENSMUST00000155336,ENSMUST00000155523,ENSMUST00000157063	NADH:ubiquinone oxidoreductase core subunit S7	75406	Ndufs7	1.12228
ENSMUSG00000060519	ENSMUST00000079625,ENSMUST00000122242,ENSMUST00000150557,ENSMUST00000152604,ENSMUST00000154353,ENSMUST00000156861,ENSMUST00000188964,ENSMUST00000190607	torsin family 3, member A	30935	Tor3a	1.1253
ENSMUSG00000022561	ENSMUST00000023221,ENSMUST00000163798,ENSMUST00000164680,ENSMUST00000164972,ENSMUST00000165179,ENSMUST00000168948,ENSMUST00000169378,ENSMUST00000170121,ENSMUST00000171005,ENSMUST00000172281,ENSMUST00000230683,ENSMUST00000230818	GPI anchor attachment protein 1	14731	Gpaa1	1.12596
ENSMUSG00000045665	ENSMUST00000051341	major facilitator superfamily domain containing 5	106073	Mfsd5	1.12603
ENSMUSG00000020163	ENSMUST00000020372,ENSMUST00000138428,ENSMUST00000141683	ubiquinol-cytochrome c reductase, complex III subunit XI	66594	Uqcr11	1.12968
ENSMUSG00000022898	ENSMUST00000023615,ENSMUST00000125229,ENSMUST00000127449,ENSMUST00000133944,ENSMUST00000142988,ENSMUST00000232569	VPS26 endosomal protein sorting factor C	13185	Vps26c	1.13125
ENSMUSG00000024132	ENSMUST00000024946,ENSMUST00000234019,ENSMUST00000234023,ENSMUST00000234150,ENSMUST00000234304,ENSMUST00000234731,ENSMUST00000235124	enoyl-Coenzyme A delta isomerase 1	13177	Eci1	1.1316
ENSMUSG00000029598	ENSMUST00000031597,ENSMUST00000131831,ENSMUST00000151361	phospholipase B domain containing 2	71772	Plbd2	1.13163
ENSMUSG00000063856	ENSMUST00000082429,ENSMUST00000191997,ENSMUST00000192401,ENSMUST00000193987	glutathione peroxidase 1	14775	Gpx1	1.13268
ENSMUSG00000026641	ENSMUST00000001284,ENSMUST00000159207,ENSMUST00000159371,ENSMUST00000159466,ENSMUST00000159929,ENSMUST00000160335,ENSMUST00000160486,ENSMUST00000161241,ENSMUST00000161297,ENSMUST00000167546	upstream transcription factor 1	22278	Usf1	1.13298
ENSMUSG00000063802	ENSMUST00000079970,ENSMUST00000205474,ENSMUST00000205952,ENSMUST00000206306,ENSMUST00000206708,ENSMUST00000206946	HSPA (heat shock 70kDa) binding protein, cytoplasmic cochaperone 1	66245	Hspbp1	1.13358
ENSMUSG00000019877	ENSMUST00000020027,ENSMUST00000164400,ENSMUST00000166997,ENSMUST00000169122,ENSMUST00000170062	serine incorporator 1	56442	Serinc1	1.13468
ENSMUSG00000002325	ENSMUST00000126269,ENSMUST00000130697,ENSMUST00000134863,ENSMUST00000136109,ENSMUST00000138037,ENSMUST00000145680,ENSMUST00000226275	interferon regulatory factor 9	16391	Irf9	1.13487
ENSMUSG00000072772	ENSMUST00000004389,ENSMUST00000129823,ENSMUST00000137318,ENSMUST00000140423	gene rich cluster, C10 gene	14790	Grcc10	1.13587
ENSMUSG00000050552	ENSMUST00000062067,ENSMUST00000160157	late endosomal/lysosomal adaptor, MAPK and MTOR activator 4	66096	Lamtor4	1.13655
ENSMUSG00000056515	ENSMUST00000070673,ENSMUST00000233258	RAB31, member RAS oncogene family	106572	Rab31	1.13864
ENSMUSG00000020225	ENSMUST00000020446,ENSMUST00000123802,ENSMUST00000134203,ENSMUST00000134797,ENSMUST00000135794,ENSMUST00000141206,ENSMUST00000145015,ENSMUST00000148678,ENSMUST00000156247,ENSMUST00000156877	transmembrane BAX inhibitor motif containing 4	68212	Tmbim4	1.13998
ENSMUSG00000031875	ENSMUST00000034343,ENSMUST00000211885,ENSMUST00000211996,ENSMUST00000212081,ENSMUST00000212139,ENSMUST00000212399,ENSMUST00000212734,ENSMUST00000212948	CKLF-like MARVEL transmembrane domain containing 3	68119	Cmtm3	1.14026
ENSMUSG00000028643	ENSMUST00000030395,ENSMUST00000097908,ENSMUST00000106345,ENSMUST00000210595	small vasohibin binding protein	69216	Svbp	1.14063
ENSMUSG00000036810	ENSMUST00000095214,ENSMUST00000117775,ENSMUST00000121097,ENSMUST00000127490,ENSMUST00000128290,ENSMUST00000131891	CTD nuclear envelope phosphatase 1 regulatory subunit 1	382030	Cnep1r1	1.14208
ENSMUSG00000021665	ENSMUST00000022169,ENSMUST00000222700	hexosaminidase B	15212	Hexb	1.14302
ENSMUSG00000058076	ENSMUST00000081560,ENSMUST00000111336,ENSMUST00000155798	succinate dehydrogenase complex, subunit C, integral membrane protein	66052	Sdhc	1.14415
ENSMUSG00000081485	ENSMUST00000122170	predicted gene 12338	NA	Gm12338	1.14645
ENSMUSG00000003721	ENSMUST00000003818,ENSMUST00000071064,ENSMUST00000159085,ENSMUST00000159125,ENSMUST00000159192,ENSMUST00000159528,ENSMUST00000160688,ENSMUST00000160968,ENSMUST00000161068,ENSMUST00000161818,ENSMUST00000162019,ENSMUST00000162582,ENSMUST00000162790,ENSMUST00000186915	insulin induced gene 2	72999	Insig2	1.14809
ENSMUSG00000061024	ENSMUST00000072079	ribosome biogenesis regulator 1	59014	Rrs1	1.15219
ENSMUSG00000046185	ENSMUST00000032802	zinc finger protein 84	74352	Zfp84	1.15402
ENSMUSG00000052040	ENSMUST00000063694,ENSMUST00000183817,ENSMUST00000183907,ENSMUST00000185175	Kruppel-like factor 13	50794	Klf13	1.15451
ENSMUSG00000020101	ENSMUST00000020301,ENSMUST00000105459,ENSMUST00000105460,ENSMUST00000164027,ENSMUST00000169139,ENSMUST00000169621,ENSMUST00000170507	V-set immunoregulatory receptor	74048	Vsir	1.15467
ENSMUSG00000026248	ENSMUST00000027464,ENSMUST00000189176	mitochondrial ribosomal protein L44	69163	Mrpl44	1.15498
ENSMUSG00000031889	ENSMUST00000034361,ENSMUST00000124113,ENSMUST00000132964,ENSMUST00000133035,ENSMUST00000141957,ENSMUST00000156561	RIKEN cDNA D230025D16 gene	234678	D230025D16Rik	1.15586
ENSMUSG00000018509	ENSMUST00000018653,ENSMUST00000123181,ENSMUST00000123542,ENSMUST00000135497,ENSMUST00000138772,ENSMUST00000156349	centromere protein V	73139	Cenpv	1.15743
ENSMUSG00000024425	ENSMUST00000025293,ENSMUST00000235458,ENSMUST00000236052,ENSMUST00000236085,ENSMUST00000236171,ENSMUST00000236480,ENSMUST00000236803,ENSMUST00000238135	Nedd4 family interacting protein 1	65113	Ndfip1	1.15865
ENSMUSG00000041926	ENSMUST00000074357,ENSMUST00000077340,ENSMUST00000130069,ENSMUST00000141092,ENSMUST00000141234,ENSMUST00000152169,ENSMUST00000188053,ENSMUST00000189615,ENSMUST00000190632	arginyl aminopeptidase (aminopeptidase B)	215615	Rnpep	1.1587
ENSMUSG00000067370	ENSMUST00000087543	UDP-Gal:betaGlcNAc beta 1,3-galactosyltransferase, polypeptide 4	54218	B3galt4	1.15888
ENSMUSG00000055041	ENSMUST00000068407,ENSMUST00000109793,ENSMUST00000230815	COMM domain containing 5	66398	Commd5	1.1607
ENSMUSG00000060032	ENSMUST00000074556,ENSMUST00000203982	H2A histone family, member J	232440	H2aj	1.16172
ENSMUSG00000030347	ENSMUST00000032497,ENSMUST00000201113,ENSMUST00000201520,ENSMUST00000201603,ENSMUST00000201617,ENSMUST00000202086,ENSMUST00000202964	DNA segment, Chr 6, Wayne State University 163, expressed	28040	D6Wsu163e	1.16259
ENSMUSG00000037049	ENSMUST00000046983,ENSMUST00000210934,ENSMUST00000211307	sphingomyelin phosphodiesterase 1, acid lysosomal	20597	Smpd1	1.16347
ENSMUSG00000025403	ENSMUST00000026470,ENSMUST00000217682,ENSMUST00000218035,ENSMUST00000218258,ENSMUST00000218313,ENSMUST00000219239,ENSMUST00000220356	serine hydroxymethyltransferase 2 (mitochondrial)	108037	Shmt2	1.16362
ENSMUSG00000001741	ENSMUST00000001792,ENSMUST00000131916,ENSMUST00000145610,ENSMUST00000151047,ENSMUST00000153560,ENSMUST00000156553	interleukin 16	16170	Il16	1.16441
ENSMUSG00000032436	ENSMUST00000035009,ENSMUST00000084867,ENSMUST00000214604,ENSMUST00000216760,ENSMUST00000217056	CKLF-like MARVEL transmembrane domain containing 7	102545	Cmtm7	1.1654
ENSMUSG00000028822	ENSMUST00000030626,ENSMUST00000105863	transmembrane protein 50A	71817	Tmem50a	1.16648
ENSMUSG00000057411	ENSMUST00000072735,ENSMUST00000235327,ENSMUST00000236161,ENSMUST00000236683,ENSMUST00000236842,ENSMUST00000237093,ENSMUST00000237703	family with sequence similarity 173, member A	214917	Fam173a	1.1679
ENSMUSG00000021361	ENSMUST00000021790	transmembrane protein 14C	66154	Tmem14c	1.16855
ENSMUSG00000029468	ENSMUST00000031425,ENSMUST00000086247,ENSMUST00000100737,ENSMUST00000121489,ENSMUST00000197042,ENSMUST00000197102,ENSMUST00000199281,ENSMUST00000199371	purinergic receptor P2X, ligand-gated ion channel, 7	18439	P2rx7	1.16922
ENSMUSG00000027995	ENSMUST00000029623	toll-like receptor 2	24088	Tlr2	1.16936
ENSMUSG00000005881	ENSMUST00000006035,ENSMUST00000088650,ENSMUST00000130793,ENSMUST00000137545,ENSMUST00000142859,ENSMUST00000144707,ENSMUST00000149381,ENSMUST00000150970,ENSMUST00000152568,ENSMUST00000155370	ERGIC and golgi 3	66366	Ergic3	1.16979
ENSMUSG00000034708	ENSMUST00000049460,ENSMUST00000123500,ENSMUST00000125819,ENSMUST00000127530,ENSMUST00000129997,ENSMUST00000135517,ENSMUST00000138451,ENSMUST00000148580,ENSMUST00000176953,ENSMUST00000177428,ENSMUST00000239431	granulin	14824	Grn	1.17104
ENSMUSG00000040652	ENSMUST00000046490,ENSMUST00000128664,ENSMUST00000128928,ENSMUST00000136166,ENSMUST00000137696,ENSMUST00000153700,ENSMUST00000154502	ornithine decarboxylase antizyme 2	18247	Oaz2	1.17127
ENSMUSG00000024856	ENSMUST00000025779,ENSMUST00000172914,ENSMUST00000174149,ENSMUST00000174514,ENSMUST00000174799	CDK2-associated protein 2	52004	Cdk2ap2	1.17134
ENSMUSG00000024953	ENSMUST00000025904,ENSMUST00000145300,ENSMUST00000149261,ENSMUST00000173091,ENSMUST00000238095	peroxiredoxin 5	54683	Prdx5	1.17189
ENSMUSG00000002014	ENSMUST00000002090,ENSMUST00000129239,ENSMUST00000130738,ENSMUST00000136544,ENSMUST00000141721,ENSMUST00000142829,ENSMUST00000155552,ENSMUST00000166518	signal sequence receptor, delta	20832	Ssr4	1.1721
ENSMUSG00000022587	ENSMUST00000051698,ENSMUST00000169343,ENSMUST00000185861,ENSMUST00000185863,ENSMUST00000186927,ENSMUST00000187284,ENSMUST00000187606,ENSMUST00000188042,ENSMUST00000188503,ENSMUST00000188866,ENSMUST00000189186,ENSMUST00000190810,ENSMUST00000191127,ENSMUST00000191145,ENSMUST00000191436,ENSMUST00000191439	lymphocyte antigen 6 complex, locus E	17069	Ly6e	1.17243
ENSMUSG00000028961	ENSMUST00000084124,ENSMUST00000124409,ENSMUST00000137982,ENSMUST00000143944,ENSMUST00000156120	phosphogluconate dehydrogenase	110208	Pgd	1.17256
ENSMUSG00000024357	ENSMUST00000025215,ENSMUST00000235524,ENSMUST00000235619,ENSMUST00000235691,ENSMUST00000235778,ENSMUST00000236007,ENSMUST00000236387,ENSMUST00000237232,ENSMUST00000237253,ENSMUST00000237309,ENSMUST00000237896	endoplasmic reticulum chaperone SIL1 homolog (S. cerevisiae)	81500	Sil1	1.17545
ENSMUSG00000015536	ENSMUST00000015680,ENSMUST00000050131,ENSMUST00000164737,ENSMUST00000164871,ENSMUST00000165022,ENSMUST00000165669,ENSMUST00000166104,ENSMUST00000166176,ENSMUST00000170985,ENSMUST00000183407,ENSMUST00000184046,ENSMUST00000184214,ENSMUST00000184245,ENSMUST00000184282,ENSMUST00000184335,ENSMUST00000184672,ENSMUST00000184781	molybdenum cofactor synthesis 2	17434	Mocs2	1.1757
ENSMUSG00000028249	ENSMUST00000029912,ENSMUST00000103008,ENSMUST00000108371,ENSMUST00000108374,ENSMUST00000140830,ENSMUST00000153861,ENSMUST00000155247,ENSMUST00000175769	syndecan binding protein	53378	Sdcbp	1.17605
ENSMUSG00000037936	ENSMUST00000086075,ENSMUST00000111390,ENSMUST00000123338,ENSMUST00000124582,ENSMUST00000127148,ENSMUST00000133624,ENSMUST00000135736,ENSMUST00000137783,ENSMUST00000148373,ENSMUST00000156532,ENSMUST00000197310	scavenger receptor class B, member 1	20778	Scarb1	1.17858
ENSMUSG00000034908	ENSMUST00000038488,ENSMUST00000114573,ENSMUST00000159033,ENSMUST00000160138,ENSMUST00000160598,ENSMUST00000160618,ENSMUST00000160670,ENSMUST00000160911,ENSMUST00000160927,ENSMUST00000161042,ENSMUST00000161606,ENSMUST00000162072,ENSMUST00000162379,ENSMUST00000162529	SID1 transmembrane family, member 2	214597	Sidt2	1.17872
ENSMUSG00000055652	ENSMUST00000092073,ENSMUST00000171155,ENSMUST00000205612,ENSMUST00000205887,ENSMUST00000206019,ENSMUST00000206418	kelch-like 25	207952	Klhl25	1.17998
ENSMUSG00000017837	ENSMUST00000017981,ENSMUST00000051947,ENSMUST00000107376,ENSMUST00000127547,ENSMUST00000142993,ENSMUST00000155840	NFKB inhibitor interacting Ras-like protein 2	71966	Nkiras2	1.18025
ENSMUSG00000024644	ENSMUST00000025546,ENSMUST00000168419,ENSMUST00000235149,ENSMUST00000235534,ENSMUST00000236029,ENSMUST00000236125,ENSMUST00000236415,ENSMUST00000237533,ENSMUST00000237605	CNDP dipeptidase 2 (metallopeptidase M20 family)	66054	Cndp2	1.1813
ENSMUSG00000021242	ENSMUST00000021668,ENSMUST00000221056,ENSMUST00000223200	NPC intracellular cholesterol transporter 2	67963	Npc2	1.18182
ENSMUSG00000062585	ENSMUST00000068830,ENSMUST00000097843	cannabinoid receptor 2 (macrophage)	12802	Cnr2	1.18206
ENSMUSG00000037824	ENSMUST00000047652,ENSMUST00000224209,ENSMUST00000224349	tetraspanin 14	52588	Tspan14	1.18226
ENSMUSG00000036985	ENSMUST00000037960,ENSMUST00000088935,ENSMUST00000123054,ENSMUST00000127440,ENSMUST00000132652,ENSMUST00000149416	zinc finger, DHHC domain containing 9	208884	Zdhhc9	1.18334
ENSMUSG00000020346	ENSMUST00000081794,ENSMUST00000101293,ENSMUST00000109194,ENSMUST00000129541,ENSMUST00000129588,ENSMUST00000135314,ENSMUST00000135489,ENSMUST00000148962,ENSMUST00000149406,ENSMUST00000152451,ENSMUST00000155806,ENSMUST00000156607,ENSMUST00000167400	mannoside acetylglucosaminyltransferase 1	17308	Mgat1	1.1837
ENSMUSG00000025232	ENSMUST00000026262	hexosaminidase A	15211	Hexa	1.18537
ENSMUSG00000039745	ENSMUST00000085272,ENSMUST00000207895,ENSMUST00000208048	HIV-1 Tat interactive protein 2	53415	Htatip2	1.18541
ENSMUSG00000059456	ENSMUST00000022622,ENSMUST00000089250,ENSMUST00000111121,ENSMUST00000127083,ENSMUST00000136216,ENSMUST00000148104,ENSMUST00000154865,ENSMUST00000178730	PTK2 protein tyrosine kinase 2 beta	19229	Ptk2b	1.18556
ENSMUSG00000005873	ENSMUST00000006027,ENSMUST00000235153,ENSMUST00000235227,ENSMUST00000236887,ENSMUST00000237414	receptor accessory protein 5	13476	Reep5	1.18575
ENSMUSG00000003380	ENSMUST00000076961,ENSMUST00000205771,ENSMUST00000205871,ENSMUST00000206222,ENSMUST00000206868,ENSMUST00000206941	Rab acceptor 1 (prenylated)	14470	Rabac1	1.18651
ENSMUSG00000030763	ENSMUST00000033025,ENSMUST00000205880,ENSMUST00000206488,ENSMUST00000206574,ENSMUST00000206721,ENSMUST00000206727	leucine carboxyl methyltransferase 1	30949	Lcmt1	1.18803
ENSMUSG00000026480	ENSMUST00000027754,ENSMUST00000186568,ENSMUST00000187235,ENSMUST00000187641,ENSMUST00000189135,ENSMUST00000190323	neutrophil cytosolic factor 2	17970	Ncf2	1.1887
ENSMUSG00000035585	ENSMUST00000038521,ENSMUST00000108627,ENSMUST00000108629,ENSMUST00000108630,ENSMUST00000123088,ENSMUST00000137204,ENSMUST00000139396,ENSMUST00000142713,ENSMUST00000147288,ENSMUST00000155060,ENSMUST00000205287,ENSMUST00000205734	tRNA splicing endonuclease subunit 34	66078	Tsen34	1.18918
ENSMUSG00000032667	ENSMUST00000057792,ENSMUST00000123838,ENSMUST00000135342,ENSMUST00000203882	paraoxonase 2	330260	Pon2	1.18966
ENSMUSG00000030341	ENSMUST00000032491,ENSMUST00000125880,ENSMUST00000130257,ENSMUST00000131434,ENSMUST00000134803,ENSMUST00000144524	tumor necrosis factor receptor superfamily, member 1a	21937	Tnfrsf1a	1.1938
ENSMUSG00000073725	ENSMUST00000095062,ENSMUST00000186096,ENSMUST00000186190,ENSMUST00000187468,ENSMUST00000190195,ENSMUST00000191471	LMBR1 domain containing 1	68421	Lmbrd1	1.19493
ENSMUSG00000028691	ENSMUST00000030454,ENSMUST00000106470,ENSMUST00000129315,ENSMUST00000135573,ENSMUST00000151129,ENSMUST00000156145	peroxiredoxin 1	18477	Prdx1	1.19606
ENSMUSG00000004610	ENSMUST00000004729,ENSMUST00000143096,ENSMUST00000155468,ENSMUST00000205363,ENSMUST00000206196,ENSMUST00000206286,ENSMUST00000206411	electron transferring flavoprotein, beta polypeptide	110826	Etfb	1.19611
ENSMUSG00000034201	ENSMUST00000037146,ENSMUST00000056649,ENSMUST00000109895,ENSMUST00000122886,ENSMUST00000151936,ENSMUST00000152257,ENSMUST00000156196	growth arrest-specific 2 like 1	78926	Gas2l1	1.19648
ENSMUSG00000022564	ENSMUST00000023225,ENSMUST00000229380,ENSMUST00000229772,ENSMUST00000229916,ENSMUST00000230347	glutamate receptor, ionotropic, N-methyl D-aspartate-associated protein 1 (glutamate binding)	66168	Grina	1.19759
ENSMUSG00000032026	ENSMUST00000034524,ENSMUST00000213508,ENSMUST00000213875,ENSMUST00000213895,ENSMUST00000214161,ENSMUST00000214929,ENSMUST00000216142,ENSMUST00000216470,ENSMUST00000216624,ENSMUST00000217037	RNA exonuclease 2	104444	Rexo2	1.1984
ENSMUSG00000026433	ENSMUST00000027693,ENSMUST00000112386,ENSMUST00000125925,ENSMUST00000187084	RAB29, member RAS oncogene family	226422	Rab29	1.19866
ENSMUSG00000097333	ENSMUST00000180536,ENSMUST00000181341,ENSMUST00000181573,ENSMUST00000181767	zinc finger protein 87	170763	Zfp87	1.19978
ENSMUSG00000041736	ENSMUST00000047419,ENSMUST00000208463	translocator protein	12257	Tspo	1.20239
ENSMUSG00000016534	ENSMUST00000016678,ENSMUST00000061755,ENSMUST00000074913,ENSMUST00000136817,ENSMUST00000144663	lysosomal-associated membrane protein 2	16784	Lamp2	1.20251
ENSMUSG00000018774	ENSMUST00000018918,ENSMUST00000108654,ENSMUST00000154124	CD68 antigen	12514	Cd68	1.20318
ENSMUSG00000019960	ENSMUST00000020118,ENSMUST00000219988,ENSMUST00000220218,ENSMUST00000220291	dual specificity phosphatase 6	67603	Dusp6	1.20751
ENSMUSG00000041959	ENSMUST00000045756,ENSMUST00000148400,ENSMUST00000170612	S100 calcium binding protein A10 (calpactin)	20194	S100a10	1.20753
ENSMUSG00000032431	ENSMUST00000084881,ENSMUST00000151377	cartilage associated protein	56693	Crtap	1.20793
ENSMUSG00000022849	ENSMUST00000023555,ENSMUST00000231579,ENSMUST00000231802	Hspb associated protein 1	66667	Hspbap1	1.2104
ENSMUSG00000046791	ENSMUST00000053744	ribosomal oxygenase 1	71952	Riox1	1.21191
ENSMUSG00000062382	ENSMUST00000221435,ENSMUST00000222435	ferritin light polypeptide 1, pseudogene 1	100862446	Ftl1-ps1	1.21732
ENSMUSG00000002996	ENSMUST00000167458,ENSMUST00000172314,ENSMUST00000175666,ENSMUST00000175686,ENSMUST00000176084,ENSMUST00000176103,ENSMUST00000176138,ENSMUST00000176520,ENSMUST00000176643	high mobility group box transcription factor 1	73389	Hbp1	1.21764
ENSMUSG00000031490	ENSMUST00000033880,ENSMUST00000210959	eukaryotic translation initiation factor 4E binding protein 1	13685	Eif4ebp1	1.21849
ENSMUSG00000039725	ENSMUST00000039007,ENSMUST00000125497	transformation related protein 53 regulating kinase A	381406	Trp53rka	1.22065
ENSMUSG00000097148	ENSMUST00000181173	predicted pseudogene 3839	NA	Gm3839	1.22172
ENSMUSG00000050708	ENSMUST00000094434,ENSMUST00000210106,ENSMUST00000210375,ENSMUST00000210864,ENSMUST00000211500,ENSMUST00000211694	ferritin light polypeptide 1	14325	Ftl1	1.22177
ENSMUSG00000043008	ENSMUST00000058839,ENSMUST00000165530,ENSMUST00000166801,ENSMUST00000171910	kelch-like 6	239743	Klhl6	1.22358
ENSMUSG00000032812	ENSMUST00000084895,ENSMUST00000084896,ENSMUST00000098243,ENSMUST00000107010,ENSMUST00000124637,ENSMUST00000125284,ENSMUST00000127873,ENSMUST00000130016,ENSMUST00000133423,ENSMUST00000134143,ENSMUST00000137384,ENSMUST00000138628,ENSMUST00000141083,ENSMUST00000148902,ENSMUST00000152082,ENSMUST00000153340,ENSMUST00000155754,ENSMUST00000156017,ENSMUST00000210162,ENSMUST00000213314	ArfGAP with RhoGAP domain, ankyrin repeat and PH domain 1	69710	Arap1	1.22387
ENSMUSG00000026457	ENSMUST00000027727,ENSMUST00000112237,ENSMUST00000148822,ENSMUST00000156433	adiponectin receptor 1	72674	Adipor1	1.22537
ENSMUSG00000041718	ENSMUST00000040338,ENSMUST00000070801,ENSMUST00000123710,ENSMUST00000132416,ENSMUST00000144185,ENSMUST00000145724,ENSMUST00000149330,ENSMUST00000149427,ENSMUST00000149811,ENSMUST00000154827,ENSMUST00000197138,ENSMUST00000197316,ENSMUST00000198039,ENSMUST00000199040,ENSMUST00000238864	asparagine-linked glycosylation 13	67574	Alg13	1.22733
ENSMUSG00000005087	ENSMUST00000005218,ENSMUST00000060516,ENSMUST00000099673,ENSMUST00000111190,ENSMUST00000111191,ENSMUST00000111192,ENSMUST00000111194,ENSMUST00000111198,ENSMUST00000124624	CD44 antigen	12505	Cd44	1.22868
ENSMUSG00000068264	ENSMUST00000089506,ENSMUST00000110206,ENSMUST00000110208,ENSMUST00000110210,ENSMUST00000134086,ENSMUST00000143546,ENSMUST00000153097,ENSMUST00000153901	adaptor-related protein 5 complex, sigma 1 subunit	69596	Ap5s1	1.23004
ENSMUSG00000049489	ENSMUST00000059468	cyclin Q	69109	Ccnq	1.23006
ENSMUSG00000022221	ENSMUST00000022830,ENSMUST00000168716,ENSMUST00000178399,ENSMUST00000226203,ENSMUST00000227072,ENSMUST00000228077,ENSMUST00000228175,ENSMUST00000228326,ENSMUST00000228476	receptor-interacting serine-threonine kinase 3	56532	Ripk3	1.23017
ENSMUSG00000005514	ENSMUST00000005651,ENSMUST00000122113,ENSMUST00000127096,ENSMUST00000132084,ENSMUST00000147515,ENSMUST00000149684,ENSMUST00000150058,ENSMUST00000153500,ENSMUST00000153515	P450 (cytochrome) oxidoreductase	18984	Por	1.2307
ENSMUSG00000059518	ENSMUST00000034953,ENSMUST00000085941,ENSMUST00000111090,ENSMUST00000111091,ENSMUST00000137272,ENSMUST00000156963	zinc finger, HIT domain containing 1	70103	Znhit1	1.23133
ENSMUSG00000015340	ENSMUST00000015484,ENSMUST00000131591,ENSMUST00000154503,ENSMUST00000164685,ENSMUST00000170885	cytochrome b-245, beta polypeptide	13058	Cybb	1.23364
ENSMUSG00000054520	ENSMUST00000067638,ENSMUST00000101316,ENSMUST00000118545,ENSMUST00000125817,ENSMUST00000138912,ENSMUST00000153750,ENSMUST00000179943,ENSMUST00000202745	SH3-domain binding protein 2	24055	Sh3bp2	1.23419
ENSMUSG00000056216	ENSMUST00000070191,ENSMUST00000130491,ENSMUST00000205752,ENSMUST00000206505	CCAAT/enhancer binding protein (C/EBP), gamma	12611	Cebpg	1.2347
ENSMUSG00000053063	ENSMUST00000065289,ENSMUST00000133756,ENSMUST00000147106,ENSMUST00000151671	C-type lectin domain family 12, member a	232413	Clec12a	1.23612
ENSMUSG00000032440	ENSMUST00000035014,ENSMUST00000061101	transforming growth factor, beta receptor II	21813	Tgfbr2	1.23989
ENSMUSG00000034509	ENSMUST00000171172	MAD2L1 binding protein	66591	Mad2l1bp	1.23998
ENSMUSG00000071547	ENSMUST00000090212,ENSMUST00000226588,ENSMUST00000226975,ENSMUST00000227096,ENSMUST00000227690,ENSMUST00000227794	5'-nucleotidase domain containing 2	70021	Nt5dc2	1.24087
ENSMUSG00000017707	ENSMUST00000017851,ENSMUST00000129854	serine incorporator 3	26943	Serinc3	1.2414
ENSMUSG00000029470	ENSMUST00000031429,ENSMUST00000081554,ENSMUST00000132062,ENSMUST00000139631,ENSMUST00000139712,ENSMUST00000142664,ENSMUST00000152337,ENSMUST00000195963,ENSMUST00000198560	purinergic receptor P2X, ligand-gated ion channel 4	18438	P2rx4	1.24661
ENSMUSG00000022092	ENSMUST00000078434,ENSMUST00000228265,ENSMUST00000228911	protein phosphatase 3, catalytic subunit, gamma isoform	19057	Ppp3cc	1.24894
ENSMUSG00000023961	ENSMUST00000024757,ENSMUST00000143137	ectonucleotide pyrophosphatase/phosphodiesterase 4	224794	Enpp4	1.2503
ENSMUSG00000037913	ENSMUST00000043352,ENSMUST00000203117,ENSMUST00000203664,ENSMUST00000212080,ENSMUST00000212194,ENSMUST00000212640	transmembrane protein 156	243025	Tmem156	1.25189
ENSMUSG00000031112	ENSMUST00000033444,ENSMUST00000114887,ENSMUST00000136741,ENSMUST00000146956	serine/threonine kinase 26	70415	Stk26	1.2519
ENSMUSG00000010609	ENSMUST00000010753,ENSMUST00000111104,ENSMUST00000111105,ENSMUST00000111106,ENSMUST00000111108,ENSMUST00000128223,ENSMUST00000130029,ENSMUST00000130711,ENSMUST00000133340,ENSMUST00000136291,ENSMUST00000149590,ENSMUST00000193897	presenilin 2	19165	Psen2	1.25351
ENSMUSG00000029426	ENSMUST00000031377,ENSMUST00000201253	scavenger receptor class B, member 2	12492	Scarb2	1.25618
ENSMUSG00000078695	ENSMUST00000107583,ENSMUST00000107584,ENSMUST00000107585,ENSMUST00000145623	CDGSH iron sulfur domain 3	217149	Cisd3	1.25628
ENSMUSG00000073435	ENSMUST00000024978,ENSMUST00000125532,ENSMUST00000145688,ENSMUST00000150500,ENSMUST00000154321	NME/NM23 nucleoside diphosphate kinase 3	79059	Nme3	1.25797
ENSMUSG00000068735	ENSMUST00000090554,ENSMUST00000111266,ENSMUST00000127173,ENSMUST00000132182,ENSMUST00000140172,ENSMUST00000143164,ENSMUST00000147377,ENSMUST00000150462	transformation related protein 53 inducible protein 11	277414	Trp53i11	1.25896
ENSMUSG00000056234	ENSMUST00000111994,ENSMUST00000163336,ENSMUST00000164341,ENSMUST00000168034,ENSMUST00000168114,ENSMUST00000168334,ENSMUST00000168385,ENSMUST00000169722,ENSMUST00000226479,ENSMUST00000227112,ENSMUST00000227498,ENSMUST00000228143,ENSMUST00000228779	nuclear receptor coactivator 4	27057	Ncoa4	1.26098
ENSMUSG00000041598	ENSMUST00000053536,ENSMUST00000106616,ENSMUST00000131488,ENSMUST00000153453	CDC42 effector protein (Rho GTPase binding) 4	56699	Cdc42ep4	1.26199
ENSMUSG00000002871	ENSMUST00000055022,ENSMUST00000123257,ENSMUST00000128171,ENSMUST00000128790,ENSMUST00000129979,ENSMUST00000135778,ENSMUST00000138415,ENSMUST00000141163,ENSMUST00000144405,ENSMUST00000148874,ENSMUST00000150236,ENSMUST00000151379,ENSMUST00000152045,ENSMUST00000152585,ENSMUST00000153874,ENSMUST00000153885,ENSMUST00000203155,ENSMUST00000203185,ENSMUST00000203345,ENSMUST00000203648,ENSMUST00000203694,…	transmembrane protein, adipocyte asscociated 1	24100	Tpra1	1.26404
ENSMUSG00000025492	ENSMUST00000026565	interferon induced transmembrane protein 3	66141	Ifitm3	1.26439
ENSMUSG00000051950	ENSMUST00000100404,ENSMUST00000201088,ENSMUST00000202302	beta-3-glucosyltransferase	381694	B3glct	1.26856
ENSMUSG00000027610	ENSMUST00000079691,ENSMUST00000126322,ENSMUST00000130881,ENSMUST00000137305,ENSMUST00000140860,ENSMUST00000155347,ENSMUST00000157008,ENSMUST00000175993,ENSMUST00000176415	glutathione synthetase	14854	Gss	1.27215
ENSMUSG00000057409	ENSMUST00000076664,ENSMUST00000233158	zinc finger protein 53	24132	Zfp53	1.27401
ENSMUSG00000030894	ENSMUST00000033184,ENSMUST00000210018,ENSMUST00000210066,ENSMUST00000210395,ENSMUST00000210730,ENSMUST00000210840,ENSMUST00000211204,ENSMUST00000211226,ENSMUST00000211560,ENSMUST00000211659	tripeptidyl peptidase I	12751	Tpp1	1.27792
ENSMUSG00000040618	ENSMUST00000048781,ENSMUST00000226231,ENSMUST00000226270,ENSMUST00000226295,ENSMUST00000226352,ENSMUST00000226514,ENSMUST00000226519,ENSMUST00000226650,ENSMUST00000226664,ENSMUST00000226770,ENSMUST00000228240,ENSMUST00000228283,ENSMUST00000228921	phosphoenolpyruvate carboxykinase 2 (mitochondrial)	74551	Pck2	1.27834
ENSMUSG00000050088	ENSMUST00000052691,ENSMUST00000164837,ENSMUST00000174004,ENSMUST00000174163	RIKEN cDNA 1600012H06 gene	67912	1600012H06Rik	1.27896
ENSMUSG00000072620	ENSMUST00000038038	schlafen 2	20556	Slfn2	1.27927
ENSMUSG00000039585	ENSMUST00000126631,ENSMUST00000127933,ENSMUST00000128341,ENSMUST00000130497,ENSMUST00000135298,ENSMUST00000136740,ENSMUST00000147364,ENSMUST00000151167	myosin IXa	270163	Myo9a	1.28637
ENSMUSG00000044080	ENSMUST00000060738,ENSMUST00000107340	S100 calcium binding protein A1	20193	S100a1	1.28903
ENSMUSG00000022108	ENSMUST00000022704,ENSMUST00000226722,ENSMUST00000227454,ENSMUST00000228637,ENSMUST00000228707	integral membrane protein 2B	16432	Itm2b	1.29263
ENSMUSG00000001999	ENSMUST00000002064,ENSMUST00000110389,ENSMUST00000135529,ENSMUST00000142737,ENSMUST00000142861	biliverdin reductase A	109778	Blvra	1.29301
ENSMUSG00000032475	ENSMUST00000112874,ENSMUST00000116522,ENSMUST00000186591,ENSMUST00000188670	non-catalytic region of tyrosine kinase adaptor protein 1	17973	Nck1	1.29366
ENSMUSG00000040883	ENSMUST00000046831,ENSMUST00000213698,ENSMUST00000214569,ENSMUST00000215650,ENSMUST00000216178,ENSMUST00000217263,ENSMUST00000238930	transmembrane protein 205	235043	Tmem205	1.29446
ENSMUSG00000007038	ENSMUST00000007253,ENSMUST00000173269,ENSMUST00000174715	neuraminidase 1	18010	Neu1	1.29497
ENSMUSG00000001029	ENSMUST00000001055,ENSMUST00000106809,ENSMUST00000106813,ENSMUST00000141146,ENSMUST00000173795	intercellular adhesion molecule 2	15896	Icam2	1.2999
ENSMUSG00000002332	ENSMUST00000002403,ENSMUST00000128802,ENSMUST00000142043,ENSMUST00000155969	dehydrogenase/reductase (SDR family) member 1	52585	Dhrs1	1.30172
ENSMUSG00000013089	ENSMUST00000079601,ENSMUST00000165506,ENSMUST00000168774,ENSMUST00000170393,ENSMUST00000170803	ets variant 5	104156	Etv5	1.30263
ENSMUSG00000053559	ENSMUST00000066068,ENSMUST00000172334,ENSMUST00000229307,ENSMUST00000229965,ENSMUST00000230280,ENSMUST00000230517	small cell adhesion glycoprotein	207818	Smagp	1.30337
ENSMUSG00000003812	ENSMUST00000003910,ENSMUST00000109744,ENSMUST00000128400,ENSMUST00000134569,ENSMUST00000135219,ENSMUST00000145292,ENSMUST00000148573,ENSMUST00000153215,ENSMUST00000155942	deoxyribonuclease II alpha	13423	Dnase2a	1.30439
ENSMUSG00000078931	ENSMUST00000055316,ENSMUST00000154271	peptide deformylase (mitochondrial)	68023	Pdf	1.30447
ENSMUSG00000039007	ENSMUST00000042167,ENSMUST00000226483,ENSMUST00000226814,ENSMUST00000226896,ENSMUST00000227018,ENSMUST00000228737,ENSMUST00000228916	carboxypeptidase Q	54381	Cpq	1.30685
ENSMUSG00000000326	ENSMUST00000000335,ENSMUST00000115609,ENSMUST00000147720,ENSMUST00000165430	catechol-O-methyltransferase	12846	Comt	1.30897
ENSMUSG00000030695	ENSMUST00000032934,ENSMUST00000087566,ENSMUST00000106348,ENSMUST00000133514,ENSMUST00000135707,ENSMUST00000139657,ENSMUST00000141355,ENSMUST00000143509,ENSMUST00000147748,ENSMUST00000151137,ENSMUST00000205336,ENSMUST00000205890	aldolase A, fructose-bisphosphate	11674	Aldoa	1.3116
ENSMUSG00000031400	ENSMUST00000004327,ENSMUST00000135894,ENSMUST00000143521,ENSMUST00000155963	glucose-6-phosphate dehydrogenase X-linked	14381	G6pdx	1.31199
ENSMUSG00000031447	ENSMUST00000033824,ENSMUST00000209709	lysosomal-associated membrane protein 1	16783	Lamp1	1.31797
ENSMUSG00000042854	ENSMUST00000051923,ENSMUST00000065753,ENSMUST00000151826	transformation related protein 53 regulating kinase B	76367	Trp53rkb	1.3181
ENSMUSG00000030917	ENSMUST00000033210,ENSMUST00000118737,ENSMUST00000155330,ENSMUST00000208968	transmembrane protein 159	233806	Tmem159	1.32054
ENSMUSG00000013707	ENSMUST00000013851	tumor necrosis factor, alpha-induced protein 8-like 2	69769	Tnfaip8l2	1.32395
ENSMUSG00000053819	ENSMUST00000066452,ENSMUST00000066466,ENSMUST00000106399,ENSMUST00000106400,ENSMUST00000106401,ENSMUST00000106402,ENSMUST00000129293,ENSMUST00000131156,ENSMUST00000131869,ENSMUST00000134466,ENSMUST00000134987,ENSMUST00000143383,ENSMUST00000145454,ENSMUST00000147043,ENSMUST00000149311,ENSMUST00000163226,ENSMUST00000167417,ENSMUST00000167985,ENSMUST00000169051,ENSMUST00000170149,ENSMUST00000171289,…	calcium/calmodulin-dependent protein kinase II, delta	108058	Camk2d	1.32753
ENSMUSG00000030166	ENSMUST00000032269,ENSMUST00000159291,ENSMUST00000159356,ENSMUST00000160558,ENSMUST00000160877,ENSMUST00000161045,ENSMUST00000161816,ENSMUST00000161860,ENSMUST00000162009,ENSMUST00000162205,ENSMUST00000162255,ENSMUST00000162461,ENSMUST00000162590,ENSMUST00000204319	RAD52 homolog, DNA repair protein	19365	Rad52	1.32826
ENSMUSG00000021752	ENSMUST00000022272,ENSMUST00000170111	potassium channel tetramerisation domain containing 6	71393	Kctd6	1.33348
ENSMUSG00000056121	ENSMUST00000070039,ENSMUST00000112487,ENSMUST00000234029,ENSMUST00000234052,ENSMUST00000234067,ENSMUST00000234530,ENSMUST00000234601,ENSMUST00000234900	fasciculation and elongation protein zeta 2 (zygin II)	225020	Fez2	1.33444
ENSMUSG00000027900	ENSMUST00000029507,ENSMUST00000067630,ENSMUST00000121034,ENSMUST00000129053,ENSMUST00000132923,ENSMUST00000134396,ENSMUST00000135740,ENSMUST00000144746,ENSMUST00000151465	DNA-damage regulated autophagy modulator 2	67171	Dram2	1.33536
ENSMUSG00000067547	ENSMUST00000146631	predicted pseudogene 7666	NA	Gm7666	1.34356
ENSMUSG00000017057	ENSMUST00000033418	interleukin 13 receptor, alpha 1	16164	Il13ra1	1.34483
ENSMUSG00000071291	ENSMUST00000076123,ENSMUST00000091523,ENSMUST00000163534,ENSMUST00000171518	zinc finger protein 58	238693	Zfp58	1.34845
ENSMUSG00000003518	ENSMUST00000003612,ENSMUST00000107172,ENSMUST00000107173,ENSMUST00000125794,ENSMUST00000143177,ENSMUST00000151678,ENSMUST00000176261	dual specificity phosphatase 3 (vaccinia virus phosphatase VH1-related)	72349	Dusp3	1.35113
ENSMUSG00000039199	ENSMUST00000044286,ENSMUST00000212109,ENSMUST00000212303,ENSMUST00000212538	zinc finger, DHHC domain containing 1	70796	Zdhhc1	1.35191
ENSMUSG00000044229	ENSMUST00000093853,ENSMUST00000215780,ENSMUST00000216998,ENSMUST00000217002	neurexophilin and PC-esterase domain family, member 4	244853	Nxpe4	1.35352
ENSMUSG00000031431	ENSMUST00000055738,ENSMUST00000112995,ENSMUST00000112996,ENSMUST00000123898,ENSMUST00000133023,ENSMUST00000152048	TSC22 domain family, member 3	14605	Tsc22d3	1.35483
ENSMUSG00000026656	ENSMUST00000027966,ENSMUST00000081103,ENSMUST00000159688,ENSMUST00000159969,ENSMUST00000160106,ENSMUST00000161503,ENSMUST00000161730	Fc receptor, IgG, low affinity IIb	14130	Fcgr2b	1.35562
ENSMUSG00000000149	ENSMUST00000000153,ENSMUST00000198447	guanine nucleotide binding protein, alpha 12	14673	Gna12	1.35867
ENSMUSG00000031453	ENSMUST00000117551,ENSMUST00000127418,ENSMUST00000132439,ENSMUST00000132637,ENSMUST00000137822,ENSMUST00000154454	RAS p21 protein activator 3	19414	Rasa3	1.3624
ENSMUSG00000036061	ENSMUST00000064067,ENSMUST00000229371,ENSMUST00000229377,ENSMUST00000229429,ENSMUST00000230529,ENSMUST00000231198	single-strand selective monofunctional uracil DNA glycosylase	71726	Smug1	1.36399
ENSMUSG00000024910	ENSMUST00000025844,ENSMUST00000235502,ENSMUST00000235786,ENSMUST00000236091,ENSMUST00000236256,ENSMUST00000237556	cathepsin W	13041	Ctsw	1.365
ENSMUSG00000024187	ENSMUST00000114988,ENSMUST00000118487,ENSMUST00000141240,ENSMUST00000151293,ENSMUST00000153582,ENSMUST00000234175,ENSMUST00000234262,ENSMUST00000234554,ENSMUST00000234687	family with sequence similarity 234, member A	106581	Fam234a	1.36954
ENSMUSG00000030711	ENSMUST00000106372,ENSMUST00000106373,ENSMUST00000155419	sulfotransferase family 1A, phenol-preferring, member 1	20887	Sult1a1	1.37003
ENSMUSG00000039682	ENSMUST00000046122,ENSMUST00000131289,ENSMUST00000135413,ENSMUST00000137699,ENSMUST00000146811,ENSMUST00000198534	leucine aminopeptidase 3	66988	Lap3	1.37067
ENSMUSG00000058715	ENSMUST00000079957,ENSMUST00000150997,ENSMUST00000193973	Fc receptor, IgE, high affinity I, gamma polypeptide	14127	Fcer1g	1.37461
ENSMUSG00000075419	ENSMUST00000100219	dolichol kinase	227697	Dolk	1.37498
ENSMUSG00000073412	ENSMUST00000097336	leukocyte specific transcript 1	16988	Lst1	1.37652
ENSMUSG00000037260	ENSMUST00000037609,ENSMUST00000209420,ENSMUST00000210894,ENSMUST00000211550	heparan-alpha-glucosaminide N-acetyltransferase	52120	Hgsnat	1.37695
ENSMUSG00000030560	ENSMUST00000032779,ENSMUST00000128791,ENSMUST00000131108,ENSMUST00000139159,ENSMUST00000152834	cathepsin C	13032	Ctsc	1.37924
ENSMUSG00000060143	ENSMUST00000073238,ENSMUST00000227553	predicted gene 10076	NA	Gm10076	1.38333
ENSMUSG00000031765	ENSMUST00000034215,ENSMUST00000211807,ENSMUST00000212291	metallothionein 1	17748	Mt1	1.38346
ENSMUSG00000075010	ENSMUST00000099676,ENSMUST00000238097	expressed sequence AW112010	107350	AW112010	1.38877
ENSMUSG00000033318	ENSMUST00000038257,ENSMUST00000218034,ENSMUST00000218500,ENSMUST00000218646,ENSMUST00000218745,ENSMUST00000219343,ENSMUST00000220195,ENSMUST00000220440	glutathione S-transferase, theta 2	14872	Gstt2	1.3907
ENSMUSG00000040270	ENSMUST00000037416,ENSMUST00000108180,ENSMUST00000125263,ENSMUST00000146748,ENSMUST00000149201,ENSMUST00000156430,ENSMUST00000171600	BTB and CNC homology, basic leucine zipper transcription factor 2	12014	Bach2	1.3911
ENSMUSG00000029455	ENSMUST00000031411,ENSMUST00000129753,ENSMUST00000133033,ENSMUST00000152945,ENSMUST00000196694,ENSMUST00000199369,ENSMUST00000200541	aldehyde dehydrogenase 2, mitochondrial	11669	Aldh2	1.39117
ENSMUSG00000020034	ENSMUST00000020223,ENSMUST00000160057,ENSMUST00000162874	t-complex 11 (mouse) like 2	216198	Tcp11l2	1.3915
ENSMUSG00000020585	ENSMUST00000020909	lysosomal-associated protein transmembrane 4A	17775	Laptm4a	1.39398
ENSMUSG00000029471	ENSMUST00000111668,ENSMUST00000196742,ENSMUST00000197373,ENSMUST00000198029,ENSMUST00000198177,ENSMUST00000198257,ENSMUST00000199179,ENSMUST00000199599,ENSMUST00000199830,ENSMUST00000199988,ENSMUST00000200109	calcium/calmodulin-dependent protein kinase kinase 2, beta	207565	Camkk2	1.39944
ENSMUSG00000038387	ENSMUST00000044111,ENSMUST00000210397,ENSMUST00000210895	related RAS viral (r-ras) oncogene	20130	Rras	1.4007
ENSMUSG00000041075	ENSMUST00000114246	frizzled class receptor 7	14369	Fzd7	1.40238
ENSMUSG00000020823	ENSMUST00000021177,ENSMUST00000090433,ENSMUST00000103026,ENSMUST00000127090,ENSMUST00000146585,ENSMUST00000153437	SEC14-like lipid binding 1	74136	Sec14l1	1.40677
ENSMUSG00000079700	ENSMUST00000054871,ENSMUST00000115565	formyl peptide receptor 3	14294	Fpr3	1.40719
ENSMUSG00000039208	ENSMUST00000036742,ENSMUST00000106089,ENSMUST00000125580	meteorin, glial cell differentiation regulator-like	210029	Metrnl	1.41351
ENSMUSG00000040813	ENSMUST00000046735,ENSMUST00000163441,ENSMUST00000169068,ENSMUST00000185257,ENSMUST00000185645,ENSMUST00000188120,ENSMUST00000188892,ENSMUST00000190948,ENSMUST00000191205,ENSMUST00000214885	testis expressed gene 264	21767	Tex264	1.41374
ENSMUSG00000038811	ENSMUST00000036088,ENSMUST00000100532,ENSMUST00000107708,ENSMUST00000107709,ENSMUST00000107711,ENSMUST00000107712,ENSMUST00000107714	guanine nucleotide binding protein (G protein), gamma transducing activity polypeptide 2	14710	Gngt2	1.41514
ENSMUSG00000015702	ENSMUST00000015846,ENSMUST00000107183,ENSMUST00000123365,ENSMUST00000164406	annexin A9	71790	Anxa9	1.41761
ENSMUSG00000040907	ENSMUST00000080882,ENSMUST00000102858,ENSMUST00000125444,ENSMUST00000146595,ENSMUST00000196684	ATPase, Na+/K+ transporting, alpha 3 polypeptide	232975	Atp1a3	1.41794
ENSMUSG00000104184	ENSMUST00000194952	predicted gene, 37818	NA	Gm37818	1.41865
ENSMUSG00000020806	ENSMUST00000103028,ENSMUST00000103029,ENSMUST00000126819,ENSMUST00000138125	rhomboid 5 homolog 2	217344	Rhbdf2	1.4195
ENSMUSG00000066800	ENSMUST00000086209,ENSMUST00000182016,ENSMUST00000182131,ENSMUST00000182538,ENSMUST00000182722,ENSMUST00000183241	ribonuclease L (2', 5'-oligoisoadenylate synthetase-dependent)	24014	Rnasel	1.42283
ENSMUSG00000010047	ENSMUST00000010191,ENSMUST00000192887,ENSMUST00000193747,ENSMUST00000194794,ENSMUST00000195667,ENSMUST00000195681,ENSMUST00000195752	hyaluronoglucosaminidase 2	15587	Hyal2	1.42345
ENSMUSG00000031216	ENSMUST00000036606,ENSMUST00000127361,ENSMUST00000145820,ENSMUST00000149999	START domain containing 8	236920	Stard8	1.4254
ENSMUSG00000024885	ENSMUST00000051803,ENSMUST00000237391	aldehyde dehydrogenase 3 family, member B1	67689	Aldh3b1	1.42912
ENSMUSG00000030545	ENSMUST00000032761,ENSMUST00000139620,ENSMUST00000150606,ENSMUST00000205297	peroxisomal biogenesis factor 11 alpha	18631	Pex11a	1.43246
ENSMUSG00000045664	ENSMUST00000055458	CDC42 effector protein (Rho GTPase binding) 2	104252	Cdc42ep2	1.43523
ENSMUSG00000027994	ENSMUST00000029624,ENSMUST00000122961,ENSMUST00000146340,ENSMUST00000153506	mitochondrial calcium uniporter dominant negative beta subunit	66815	Mcub	1.43678
ENSMUSG00000022037	ENSMUST00000022616,ENSMUST00000127387,ENSMUST00000128539,ENSMUST00000138191,ENSMUST00000138665,ENSMUST00000144619,ENSMUST00000146990,ENSMUST00000152903,ENSMUST00000153460	clusterin	12759	Clu	1.43727
ENSMUSG00000027004	ENSMUST00000028389,ENSMUST00000142459	frizzled-related protein	20378	Frzb	1.43759
ENSMUSG00000078670	ENSMUST00000107456,ENSMUST00000205946,ENSMUST00000206337	family with sequence similarity 174, member B	100038347	Fam174b	1.43819
ENSMUSG00000041460	ENSMUST00000037434,ENSMUST00000185965,ENSMUST00000186176,ENSMUST00000186203,ENSMUST00000186622,ENSMUST00000186702,ENSMUST00000187222,ENSMUST00000188239,ENSMUST00000190015,ENSMUST00000191331,ENSMUST00000238905	calcium channel, voltage-dependent, alpha 2/delta subunit 4	319734	Cacna2d4	1.43868
ENSMUSG00000031584	ENSMUST00000033992,ENSMUST00000149528,ENSMUST00000154745	glutathione reductase	14782	Gsr	1.43869
ENSMUSG00000073002	ENSMUST00000074231,ENSMUST00000101285,ENSMUST00000206154	vesicle-associated membrane protein 5	53620	Vamp5	1.44166
ENSMUSG00000032035	ENSMUST00000034534,ENSMUST00000050797,ENSMUST00000183879,ENSMUST00000184110,ENSMUST00000184364,ENSMUST00000184887,ENSMUST00000238819	E26 avian leukemia oncogene 1, 5' domain	23871	Ets1	1.44218
ENSMUSG00000001173	ENSMUST00000001202,ENSMUST00000115013,ENSMUST00000115020,ENSMUST00000142719,ENSMUST00000144664,ENSMUST00000146486,ENSMUST00000154732	OCRL, inositol polyphosphate-5-phosphatase	320634	Ocrl	1.44614
ENSMUSG00000024074	ENSMUST00000112498,ENSMUST00000234059,ENSMUST00000234439,ENSMUST00000234546,ENSMUST00000234700,ENSMUST00000234964	cysteine rich transmembrane BMP regulator 1 (chordin like)	50766	Crim1	1.44965
ENSMUSG00000022856	ENSMUST00000023562,ENSMUST00000232635	transmembrane protein 41a	66664	Tmem41a	1.45134
ENSMUSG00000094437	ENSMUST00000178509	predicted gene 9830	NA	Gm9830	1.45147
ENSMUSG00000008496	ENSMUST00000098679,ENSMUST00000108413,ENSMUST00000108415,ENSMUST00000108416,ENSMUST00000108417,ENSMUST00000108418,ENSMUST00000147146,ENSMUST00000175754,ENSMUST00000175774,ENSMUST00000176408	POU domain, class 2, transcription factor 2	18987	Pou2f2	1.45179
ENSMUSG00000038807	ENSMUST00000047488,ENSMUST00000102521,ENSMUST00000123440,ENSMUST00000145524,ENSMUST00000208896,ENSMUST00000238457	RAP1 GTPase activating protein 2	380711	Rap1gap2	1.45376
ENSMUSG00000045636	ENSMUST00000051379,ENSMUST00000059115,ENSMUST00000093534,ENSMUST00000117735,ENSMUST00000118835,ENSMUST00000127665,ENSMUST00000131965,ENSMUST00000135194,ENSMUST00000142936,ENSMUST00000143853,ENSMUST00000145860,ENSMUST00000155055,ENSMUST00000155174,ENSMUST00000155626	mitochondrial tumor suppressor 1	102103	Mtus1	1.45427
ENSMUSG00000034164	ENSMUST00000062821,ENSMUST00000132196,ENSMUST00000132328,ENSMUST00000138551,ENSMUST00000151906,ENSMUST00000153308,ENSMUST00000156492,ENSMUST00000163299	EMI domain containing 1	140703	Emid1	1.4546
ENSMUSG00000049037	ENSMUST00000060484	C-type lectin domain family 4, member a1	269799	Clec4a1	1.45571
ENSMUSG00000056204	ENSMUST00000070173,ENSMUST00000209768,ENSMUST00000210193,ENSMUST00000210307,ENSMUST00000210459,ENSMUST00000210786,ENSMUST00000211526,ENSMUST00000211715	pyroglutamyl-peptidase I	66522	Pgpep1	1.45652
ENSMUSG00000025779	ENSMUST00000026881,ENSMUST00000190366,ENSMUST00000191260	lymphocyte antigen 96	17087	Ly96	1.45794
ENSMUSG00000060512	ENSMUST00000081747,ENSMUST00000196367,ENSMUST00000196575,ENSMUST00000199667	RIKEN cDNA 0610040J01 gene	76261	0610040J01Rik	1.45847
ENSMUSG00000056737	ENSMUST00000071044,ENSMUST00000114071,ENSMUST00000114072,ENSMUST00000126101,ENSMUST00000126124,ENSMUST00000127770,ENSMUST00000134809,ENSMUST00000137435,ENSMUST00000155188,ENSMUST00000155705,ENSMUST00000156168	capping protein (actin filament), gelsolin-like	12332	Capg	1.45884
ENSMUSG00000011148	ENSMUST00000021726,ENSMUST00000180015,ENSMUST00000221720,ENSMUST00000223044	adenylosuccinate synthetase like 1	11565	Adssl1	1.46744
ENSMUSG00000073008	ENSMUST00000101294,ENSMUST00000117310,ENSMUST00000118820,ENSMUST00000120971,ENSMUST00000138031,ENSMUST00000156709,ENSMUST00000178838	G protein-coupled receptor 174	213439	Gpr174	1.46937
ENSMUSG00000028173	ENSMUST00000068952,ENSMUST00000196276,ENSMUST00000196782,ENSMUST00000197328,ENSMUST00000198878,ENSMUST00000200191,ENSMUST00000200571	wntless WNT ligand secretion mediator	68151	Wls	1.46973
ENSMUSG00000047867	ENSMUST00000053661,ENSMUST00000119315,ENSMUST00000126422,ENSMUST00000132725	GTPase, IMAP family member 6	231931	Gimap6	1.4701
ENSMUSG00000033857	ENSMUST00000043447,ENSMUST00000135383,ENSMUST00000139813,ENSMUST00000139917,ENSMUST00000166995,ENSMUST00000168689,ENSMUST00000168785,ENSMUST00000171769,ENSMUST00000172279	endo-beta-N-acetylglucosaminidase	217364	Engase	1.4703
ENSMUSG00000032883	ENSMUST00000035779,ENSMUST00000132997,ENSMUST00000134566,ENSMUST00000135642,ENSMUST00000142704,ENSMUST00000148608,ENSMUST00000154777	acyl-CoA synthetase long-chain family member 3	74205	Acsl3	1.47226
ENSMUSG00000003420	ENSMUST00000003512,ENSMUST00000209830,ENSMUST00000210642,ENSMUST00000211085,ENSMUST00000211535,ENSMUST00000211668	Fc receptor, IgG, alpha chain transporter	14132	Fcgrt	1.47257
ENSMUSG00000104303	ENSMUST00000192632	predicted gene, 36976	NA	Gm36976	1.4732
ENSMUSG00000078127	ENSMUST00000104926,ENSMUST00000227787	family with sequence similarity 170, member B	105511	Fam170b	1.47571
ENSMUSG00000046031	ENSMUST00000062784	calcium homeostasis modulator family member 6	215900	Calhm6	1.47755
ENSMUSG00000032122	ENSMUST00000115068,ENSMUST00000161114,ENSMUST00000162018	solute carrier family 37 (glycerol-3-phosphate transporter), member 2	56857	Slc37a2	1.48139
ENSMUSG00000004748	ENSMUST00000004868,ENSMUST00000123607	mitochondrial fission process 1	67900	Mtfp1	1.4814
ENSMUSG00000028982	ENSMUST00000105686	solute carrier family 25, member 33	70556	Slc25a33	1.48245
ENSMUSG00000023571	ENSMUST00000024338,ENSMUST00000127222,ENSMUST00000149558	C1q and tumor necrosis factor related 12	67389	C1qtnf12	1.48269
ENSMUSG00000030126	ENSMUST00000032222,ENSMUST00000088896,ENSMUST00000172510,ENSMUST00000172909,ENSMUST00000173031,ENSMUST00000173110,ENSMUST00000173117,ENSMUST00000173140,ENSMUST00000173548,ENSMUST00000204353,ENSMUST00000204574,ENSMUST00000204637,ENSMUST00000205160	transmembrane and coiled coil domains 1	330401	Tmcc1	1.48521
ENSMUSG00000015202	ENSMUST00000015346,ENSMUST00000150282	Cnksr family member 3	215748	Cnksr3	1.48554
ENSMUSG00000115252	ENSMUST00000228949	NA	NA	Gm48996	1.48708
ENSMUSG00000064254	ENSMUST00000077191	ethylmalonic encephalopathy 1	66071	Ethe1	1.48918
ENSMUSG00000022957	ENSMUST00000056482,ENSMUST00000064797,ENSMUST00000095909,ENSMUST00000113993,ENSMUST00000113996,ENSMUST00000113999,ENSMUST00000114001,ENSMUST00000114002,ENSMUST00000124094,ENSMUST00000125052,ENSMUST00000126374,ENSMUST00000131739,ENSMUST00000131983,ENSMUST00000133389,ENSMUST00000135057,ENSMUST00000137575,ENSMUST00000138117,ENSMUST00000139890,ENSMUST00000141073,ENSMUST00000141625,ENSMUST00000143023,…	intersectin 1 (SH3 domain protein 1A)	16443	Itsn1	1.48962
ENSMUSG00000021213	ENSMUST00000021634,ENSMUST00000128892,ENSMUST00000140971	aldo-keto reductase family 1, member C13	27384	Akr1c13	1.49175
ENSMUSG00000031402	ENSMUST00000033775,ENSMUST00000114091,ENSMUST00000114092,ENSMUST00000127023,ENSMUST00000132501,ENSMUST00000132935,ENSMUST00000135285,ENSMUST00000153318,ENSMUST00000155742,ENSMUST00000156975	membrane protein, palmitoylated	17524	Mpp1	1.49424
ENSMUSG00000091421	ENSMUST00000169025	predicted gene 4202	NA	Gm4202	1.49607
ENSMUSG00000030336	ENSMUST00000032486,ENSMUST00000112281,ENSMUST00000112282,ENSMUST00000135205,ENSMUST00000151527,ENSMUST00000152650	CD27 antigen	21940	Cd27	1.50804
ENSMUSG00000028518	ENSMUST00000030243	protein kinase, AMP-activated, alpha 2 catalytic subunit	108079	Prkaa2	1.51133
ENSMUSG00000039704	ENSMUST00000090380,ENSMUST00000226149,ENSMUST00000227216,ENSMUST00000227556	LMBR1 domain containing 2	320506	Lmbrd2	1.51237
ENSMUSG00000040592	ENSMUST00000044228,ENSMUST00000167143	CD79B antigen	15985	Cd79b	1.51514
ENSMUSG00000038034	ENSMUST00000039506,ENSMUST00000085912,ENSMUST00000128508,ENSMUST00000139528,ENSMUST00000150598,ENSMUST00000155363,ENSMUST00000194505,ENSMUST00000195659	immunoglobulin superfamily, member 8	140559	Igsf8	1.51704
ENSMUSG00000081534	ENSMUST00000117892,ENSMUST00000135073,ENSMUST00000229084,ENSMUST00000230531	solute carrier family 48 (heme transporter), member 1	67739	Slc48a1	1.52991
ENSMUSG00000033863	ENSMUST00000036884,ENSMUST00000236357	Kruppel-like factor 9	16601	Klf9	1.53254
ENSMUSG00000039497	ENSMUST00000048010,ENSMUST00000215547,ENSMUST00000216194,ENSMUST00000216774,ENSMUST00000217051	dermatan sulfate epimerase	212898	Dse	1.53476
ENSMUSG00000050989	ENSMUST00000060435,ENSMUST00000127585	selenoprotein N	74777	Selenon	1.53673
ENSMUSG00000034487	ENSMUST00000037853,ENSMUST00000214164	KDEL (Lys-Asp-Glu-Leu) containing 2	68304	Poglut3	1.53868
ENSMUSG00000031497	ENSMUST00000033892,ENSMUST00000207551,ENSMUST00000207792,ENSMUST00000208166,ENSMUST00000208683,ENSMUST00000208770	tumor necrosis factor (ligand) superfamily, member 13b	24099	Tnfsf13b	1.54118
ENSMUSG00000027883	ENSMUST00000029482,ENSMUST00000124043,ENSMUST00000145558,ENSMUST00000154263	G-protein signalling modulator 2 (AGS3-like, C. elegans)	76123	Gpsm2	1.54133
ENSMUSG00000034557	ENSMUST00000042185,ENSMUST00000106657,ENSMUST00000106658	zinc finger, FYVE domain containing 9	230597	Zfyve9	1.55355
ENSMUSG00000034463	ENSMUST00000042046	scavenger receptor class A, member 3	219151	Scara3	1.56012
ENSMUSG00000002103	ENSMUST00000002172,ENSMUST00000124131,ENSMUST00000127643,ENSMUST00000150403,ENSMUST00000155418,ENSMUST00000238832,ENSMUST00000239169	acid phosphatase 2, lysosomal	11432	Acp2	1.56077
ENSMUSG00000022438	ENSMUST00000023072,ENSMUST00000122818,ENSMUST00000131158,ENSMUST00000146020	parvin, beta	170736	Parvb	1.5617
ENSMUSG00000034462	ENSMUST00000086831,ENSMUST00000130931,ENSMUST00000133540	polycystic kidney disease 2	18764	Pkd2	1.56342
ENSMUSG00000038291	ENSMUST00000041582,ENSMUST00000110377,ENSMUST00000110378,ENSMUST00000136097,ENSMUST00000144244,ENSMUST00000150645,ENSMUST00000170416,ENSMUST00000176410,ENSMUST00000177186	sorting nexin 25	102141	Snx25	1.5695
ENSMUSG00000037661	ENSMUST00000046748,ENSMUST00000108258,ENSMUST00000108259,ENSMUST00000108261,ENSMUST00000130294,ENSMUST00000147697,ENSMUST00000166278,ENSMUST00000194979	G protein-coupled receptor 160	71862	Gpr160	1.57124
ENSMUSG00000028789	ENSMUST00000030581,ENSMUST00000106068,ENSMUST00000119354,ENSMUST00000128820,ENSMUST00000143912,ENSMUST00000147731,ENSMUST00000156739	antizyme inhibitor 2	242669	Azin2	1.57453
ENSMUSG00000038175	ENSMUST00000038275,ENSMUST00000222178	myosin regulatory light chain interacting protein	218203	Mylip	1.57621
ENSMUSG00000026573	ENSMUST00000027860	chemokine (C motif) ligand 1	16963	Xcl1	1.57673
ENSMUSG00000037295	ENSMUST00000037828,ENSMUST00000140678,ENSMUST00000148479	low density lipoprotein receptor adaptor protein 1	100017	Ldlrap1	1.5837
ENSMUSG00000037280	ENSMUST00000052069,ENSMUST00000159715,ENSMUST00000161514	polypeptide N-acetylgalactosaminyltransferase 6	207839	Galnt6	1.58528
ENSMUSG00000075705	ENSMUST00000101800,ENSMUST00000115262	methionine sulfoxide reductase B1	27361	Msrb1	1.58581
ENSMUSG00000040713	ENSMUST00000040298,ENSMUST00000111432,ENSMUST00000140769	cellular repressor of E1A-stimulated genes 1	433375	Creg1	1.58669
ENSMUSG00000020388	ENSMUST00000018755,ENSMUST00000093109,ENSMUST00000127271,ENSMUST00000144477,ENSMUST00000151948	PDZ and LIM domain 4	30794	Pdlim4	1.58899
ENSMUSG00000024030	ENSMUST00000024829,ENSMUST00000139013,ENSMUST00000236241,ENSMUST00000236391,ENSMUST00000236427	ATP binding cassette subfamily G member 1	11307	Abcg1	1.59326
ENSMUSG00000044103	ENSMUST00000057567	interleukin 1 family, member 9	215257	Il1f9	1.5959
ENSMUSG00000025171	ENSMUST00000026170,ENSMUST00000237817	ubiquitin domain containing 1	226122	Ubtd1	1.606
ENSMUSG00000023993	ENSMUST00000024792,ENSMUST00000223956,ENSMUST00000223968,ENSMUST00000224001,ENSMUST00000225849	triggering receptor expressed on myeloid cells-like 1	71326	Treml1	1.60691
ENSMUSG00000097944	ENSMUST00000183021	RIKEN cDNA A130014A01 gene	NA	A130014A01Rik	1.60727
ENSMUSG00000028736	ENSMUST00000030508,ENSMUST00000174681	paired box 7	18509	Pax7	1.6182
ENSMUSG00000074272	ENSMUST00000098666,ENSMUST00000098668,ENSMUST00000098669,ENSMUST00000205308,ENSMUST00000206171,ENSMUST00000206483,ENSMUST00000206583,ENSMUST00000206676,ENSMUST00000206687,ENSMUST00000206717,ENSMUST00000206981	carcinoembryonic antigen-related cell adhesion molecule 1	26365	Ceacam1	1.62019
ENSMUSG00000051457	ENSMUST00000049931,ENSMUST00000143713,ENSMUST00000205483	sialophorin	20737	Spn	1.62158
ENSMUSG00000023079	ENSMUST00000073161,ENSMUST00000074114,ENSMUST00000100650,ENSMUST00000100652,ENSMUST00000100654,ENSMUST00000111244,ENSMUST00000111245,ENSMUST00000167084,ENSMUST00000171794,ENSMUST00000200798,ENSMUST00000200817,ENSMUST00000200944,ENSMUST00000201441,ENSMUST00000201447,ENSMUST00000201495,ENSMUST00000201526,ENSMUST00000201608,ENSMUST00000201647,ENSMUST00000201704,ENSMUST00000202104,ENSMUST00000202165,…	general transcription factor II I repeat domain-containing 1	57080	Gtf2ird1	1.6279
ENSMUSG00000036622	ENSMUST00000037055,ENSMUST00000125797,ENSMUST00000127833,ENSMUST00000135117,ENSMUST00000137630,ENSMUST00000151517,ENSMUST00000156995,ENSMUST00000168047,ENSMUST00000170797	ATPase type 13A2	74772	Atp13a2	1.62939
ENSMUSG00000085977	ENSMUST00000131638	predicted gene 5970	NA	Gm5970	1.63076
ENSMUSG00000044452	ENSMUST00000061586,ENSMUST00000144656,ENSMUST00000187282,ENSMUST00000205670,ENSMUST00000206003,ENSMUST00000206615,ENSMUST00000206761	zinc finger protein 507	668501	Zfp507	1.63159
ENSMUSG00000022305	ENSMUST00000022916,ENSMUST00000110305,ENSMUST00000146714,ENSMUST00000228575	low density lipoprotein-related protein 12	239393	Lrp12	1.63179
ENSMUSG00000026193	ENSMUST00000055226,ENSMUST00000185408,ENSMUST00000186129,ENSMUST00000186575,ENSMUST00000186613,ENSMUST00000186736,ENSMUST00000186879,ENSMUST00000186940,ENSMUST00000186985,ENSMUST00000187627,ENSMUST00000187938,ENSMUST00000188092,ENSMUST00000188674,ENSMUST00000188894,ENSMUST00000189160,ENSMUST00000189821,ENSMUST00000190780	fibronectin 1	14268	Fn1	1.63877
ENSMUSG00000021281	ENSMUST00000102745,ENSMUST00000109792,ENSMUST00000127028,ENSMUST00000127207,ENSMUST00000129467,ENSMUST00000133865,ENSMUST00000156003,ENSMUST00000172783,ENSMUST00000173581,ENSMUST00000174298,ENSMUST00000174692	tumor necrosis factor, alpha-induced protein 2	21928	Tnfaip2	1.64338
ENSMUSG00000074623	ENSMUST00000099127,ENSMUST00000109475,ENSMUST00000138905	predicted gene 826	329554	Gm826	1.64778
ENSMUSG00000038523	ENSMUST00000045116,ENSMUST00000109709,ENSMUST00000135641	RIKEN cDNA 1700003F12 gene	75480	1700003F12Rik	1.64807
ENSMUSG00000025743	ENSMUST00000070478,ENSMUST00000140623,ENSMUST00000141297,ENSMUST00000146093,ENSMUST00000152591	syndecan 3	20970	Sdc3	1.6551
ENSMUSG00000022756	ENSMUST00000063544,ENSMUST00000172164,ENSMUST00000231283,ENSMUST00000231552,ENSMUST00000231615,ENSMUST00000231645,ENSMUST00000232186,ENSMUST00000232226,ENSMUST00000232336,ENSMUST00000232385,ENSMUST00000232429	solute carrier family 7 (cationic amino acid transporter, y+ system), member 4	224022	Slc7a4	1.66337
ENSMUSG00000032946	ENSMUST00000035716,ENSMUST00000113467,ENSMUST00000113468,ENSMUST00000113469,ENSMUST00000113471,ENSMUST00000113472,ENSMUST00000113475,ENSMUST00000113476,ENSMUST00000122930,ENSMUST00000123661,ENSMUST00000127021,ENSMUST00000130480,ENSMUST00000133968,ENSMUST00000135532,ENSMUST00000138555,ENSMUST00000139522,ENSMUST00000145611,ENSMUST00000146601,ENSMUST00000146831,ENSMUST00000148906,ENSMUST00000149205,…	RAS, guanyl releasing protein 2	19395	Rasgrp2	1.6637
ENSMUSG00000029998	ENSMUST00000032065,ENSMUST00000129650,ENSMUST00000131500,ENSMUST00000153723,ENSMUST00000203960,ENSMUST00000204116	prenylcysteine oxidase 1	66881	Pcyox1	1.66708
ENSMUSG00000070858	ENSMUST00000094869,ENSMUST00000114382,ENSMUST00000114383,ENSMUST00000142510,ENSMUST00000206020	predicted gene 1673	381633	Gm1673	1.66863
ENSMUSG00000102591	ENSMUST00000194131	predicted gene, 38383	NA	Gm38383	1.67227
ENSMUSG00000030272	ENSMUST00000032409,ENSMUST00000149497,ENSMUST00000153067,ENSMUST00000155543,ENSMUST00000156512,ENSMUST00000156853	calcium/calmodulin-dependent protein kinase I	52163	Camk1	1.67785
ENSMUSG00000050248	ENSMUST00000056365,ENSMUST00000101258,ENSMUST00000159854,ENSMUST00000159915	EvC ciliary complex subunit 2	68525	Evc2	1.67804
ENSMUSG00000030325	ENSMUST00000167691,ENSMUST00000172601,ENSMUST00000174404,ENSMUST00000174865	killer cell lectin-like receptor subfamily B member 1C	17059	Klrb1c	1.67904
ENSMUSG00000043940	ENSMUST00000053177,ENSMUST00000172512,ENSMUST00000172927,ENSMUST00000173955,ENSMUST00000174598,ENSMUST00000174698,ENSMUST00000212024	WD repeat and FYVE domain containing 3	72145	Wdfy3	1.67987
ENSMUSG00000041058	ENSMUST00000035982,ENSMUST00000108246	WW domain containing E3 ubiquitin protein ligase 1	107568	Wwp1	1.68413
ENSMUSG00000019872	ENSMUST00000020022,ENSMUST00000125076,ENSMUST00000151623	sphingomyelin phosphodiesterase, acid-like 3A	57319	Smpdl3a	1.68539
ENSMUSG00000028268	ENSMUST00000029935,ENSMUST00000106221,ENSMUST00000106222,ENSMUST00000128609,ENSMUST00000142060,ENSMUST00000142731,ENSMUST00000199325	guanylate binding protein 3	55932	Gbp3	1.69797
ENSMUSG00000020900	ENSMUST00000018887,ENSMUST00000092984,ENSMUST00000102611,ENSMUST00000108673,ENSMUST00000124006,ENSMUST00000139059,ENSMUST00000141558,ENSMUST00000143032,ENSMUST00000145408,ENSMUST00000155765	myosin, heavy polypeptide 10, non-muscle	77579	Myh10	1.70753
ENSMUSG00000004846	ENSMUST00000004968,ENSMUST00000127100,ENSMUST00000129896,ENSMUST00000137419,ENSMUST00000144784,ENSMUST00000151642	procollagen-lysine, 2-oxoglutarate 5-dioxygenase 3	26433	Plod3	1.70786
ENSMUSG00000090019	ENSMUST00000054368,ENSMUST00000140054,ENSMUST00000142703,ENSMUST00000203797,ENSMUST00000204168,ENSMUST00000205031	GTPase, IMAP family member 1	16205	Gimap1	1.716
ENSMUSG00000021939	ENSMUST00000006235,ENSMUST00000225540,ENSMUST00000225639	cathepsin B	13030	Ctsb	1.71711
ENSMUSG00000039246	ENSMUST00000045388,ENSMUST00000195481	lysophospholipase-like 1	226791	Lyplal1	1.73752
ENSMUSG00000040964	ENSMUST00000039204,ENSMUST00000069623,ENSMUST00000097820,ENSMUST00000105797,ENSMUST00000105798,ENSMUST00000105799,ENSMUST00000125045,ENSMUST00000138493,ENSMUST00000140403,ENSMUST00000143614,ENSMUST00000147426,ENSMUST00000154979	Rho guanine nucleotide exchange factor (GEF) 10-like	72754	Arhgef10l	1.73841
ENSMUSG00000022895	ENSMUST00000023612,ENSMUST00000232792,ENSMUST00000233499,ENSMUST00000233550,ENSMUST00000233578,ENSMUST00000233908	E26 avian leukemia oncogene 2, 3' domain	23872	Ets2	1.74122
ENSMUSG00000079017	ENSMUST00000055071	interferon, alpha-inducible protein 27 like 2A	76933	Ifi27l2a	1.74485
ENSMUSG00000072941	ENSMUST00000101208	superoxide dismutase 3, extracellular	20657	Sod3	1.74621
ENSMUSG00000102917	ENSMUST00000195240	predicted gene, 37724	NA	Gm37724	1.74648
ENSMUSG00000027695	ENSMUST00000067757,ENSMUST00000120834,ENSMUST00000123539,ENSMUST00000125338,ENSMUST00000126594,ENSMUST00000127139,ENSMUST00000131842,ENSMUST00000148827,ENSMUST00000149017,ENSMUST00000195622	phospholipase D1	18805	Pld1	1.747
ENSMUSG00000101903	ENSMUST00000186055,ENSMUST00000188927	predicted gene 29291	NA	Gm29291	1.74903
ENSMUSG00000020432	ENSMUST00000020710,ENSMUST00000109988,ENSMUST00000109989,ENSMUST00000109990,ENSMUST00000109991,ENSMUST00000109992,ENSMUST00000109993	transcobalamin 2	21452	Tcn2	1.75313
ENSMUSG00000054675	ENSMUST00000067853,ENSMUST00000160374	transmembrane protein 119	231633	Tmem119	1.75556
ENSMUSG00000064039	ENSMUST00000071404	chemokine (C-C motif) receptor 1-like 1	12770	Ccr1l1	1.75927
ENSMUSG00000057137	ENSMUST00000074949,ENSMUST00000123019,ENSMUST00000201749,ENSMUST00000202010,ENSMUST00000202764,ENSMUST00000202999	transmembrane protein 140	68487	Tmem140	1.76175
ENSMUSG00000029084	ENSMUST00000030964,ENSMUST00000196600	CD38 antigen	12494	Cd38	1.76508
ENSMUSG00000031504	ENSMUST00000033900	RAB20, member RAS oncogene family	19332	Rab20	1.76615
ENSMUSG00000037410	ENSMUST00000041767,ENSMUST00000128874,ENSMUST00000144348,ENSMUST00000144646	TBC1 domain family, member 2B	67016	Tbc1d2b	1.76638
ENSMUSG00000003484	ENSMUST00000003574,ENSMUST00000125448,ENSMUST00000141975	cytochrome P450, family 4, subfamily f, polypeptide 18	72054	Cyp4f18	1.77034
ENSMUSG00000001552	ENSMUST00000001592,ENSMUST00000107403,ENSMUST00000123903,ENSMUST00000124659,ENSMUST00000128268,ENSMUST00000149798,ENSMUST00000151476,ENSMUST00000152774,ENSMUST00000155746	junction plakoglobin	16480	Jup	1.77188
ENSMUSG00000020953	ENSMUST00000085412,ENSMUST00000164782,ENSMUST00000218382,ENSMUST00000220173	cochlin	12810	Coch	1.77338
ENSMUSG00000039217	ENSMUST00000059081,ENSMUST00000180021,ENSMUST00000213916,ENSMUST00000214117	interleukin 18	16173	Il18	1.78056
ENSMUSG00000034101	ENSMUST00000036811,ENSMUST00000066177,ENSMUST00000067232,ENSMUST00000099941,ENSMUST00000111670,ENSMUST00000111675,ENSMUST00000111676,ENSMUST00000111677,ENSMUST00000111678,ENSMUST00000111684,ENSMUST00000111685,ENSMUST00000111686,ENSMUST00000111687,ENSMUST00000111688,ENSMUST00000111689,ENSMUST00000111690,ENSMUST00000111691,ENSMUST00000111692,ENSMUST00000111693,ENSMUST00000111694,ENSMUST00000111695,…	catenin (cadherin associated protein), delta 1	12388	Ctnnd1	1.78097
ENSMUSG00000014778	ENSMUST00000014922,ENSMUST00000132777,ENSMUST00000134837,ENSMUST00000136439	formin homology 2 domain containing 1	234686	Fhod1	1.78302
ENSMUSG00000035158	ENSMUST00000043628,ENSMUST00000043637,ENSMUST00000101123,ENSMUST00000113339,ENSMUST00000139462,ENSMUST00000148233,ENSMUST00000203884,ENSMUST00000203938	melanogenesis associated transcription factor	17342	Mitf	1.78516
ENSMUSG00000037759	ENSMUST00000046891,ENSMUST00000227198	prostaglandin E receptor 2 (subtype EP2)	19217	Ptger2	1.78671
ENSMUSG00000069792	ENSMUST00000092836	WAP four-disulfide core domain 17	100034251	Wfdc17	1.78974
ENSMUSG00000066975	ENSMUST00000086629,ENSMUST00000112383,ENSMUST00000112385	crystallin, beta A4	12959	Cryba4	1.79652
ENSMUSG00000034641	ENSMUST00000045075	CD300 molecule like family member d	217305	Cd300ld	1.79661
ENSMUSG00000022199	ENSMUST00000050772,ENSMUST00000226456,ENSMUST00000226467,ENSMUST00000226690,ENSMUST00000226718,ENSMUST00000227600,ENSMUST00000227880,ENSMUST00000228119,ENSMUST00000228249,ENSMUST00000228495,ENSMUST00000228588,ENSMUST00000231305	solute carrier family 22 (organic cation transporter), member 17	59049	Slc22a17	1.79795
ENSMUSG00000022788	ENSMUST00000069284,ENSMUST00000159058,ENSMUST00000159542,ENSMUST00000161188,ENSMUST00000161624,ENSMUST00000161861,ENSMUST00000162045,ENSMUST00000162124,ENSMUST00000162414,ENSMUST00000162542,ENSMUST00000162671,ENSMUST00000172181	FYVE, RhoGEF and PH domain containing 4	224014	Fgd4	1.80447
ENSMUSG00000032679	ENSMUST00000040423,ENSMUST00000153312,ENSMUST00000168176	CD59a antigen	12509	Cd59a	1.80987
ENSMUSG00000033880	ENSMUST00000043722,ENSMUST00000106290,ENSMUST00000127054,ENSMUST00000141459,ENSMUST00000144529	lectin, galactoside-binding, soluble, 3 binding protein	19039	Lgals3bp	1.82124
ENSMUSG00000068874	ENSMUST00000090839,ENSMUST00000134202,ENSMUST00000139949,ENSMUST00000140757,ENSMUST00000145551	selenium binding protein 1	20341	Selenbp1	1.82206
ENSMUSG00000070803	ENSMUST00000094814	Cbp/p300-interacting transactivator, with Glu/Asp-rich carboxy-terminal domain, 4	56222	Cited4	1.82252
ENSMUSG00000024053	ENSMUST00000024849,ENSMUST00000232777,ENSMUST00000233057,ENSMUST00000233083,ENSMUST00000233148,ENSMUST00000233245,ENSMUST00000233343,ENSMUST00000233659,ENSMUST00000233677,ENSMUST00000233698,ENSMUST00000233728	elastin microfibril interfacer 2	246707	Emilin2	1.8266
ENSMUSG00000112023	ENSMUST00000102894,ENSMUST00000218179,ENSMUST00000218649,ENSMUST00000218704,ENSMUST00000218900,ENSMUST00000219053,ENSMUST00000219151,ENSMUST00000219178,ENSMUST00000219262,ENSMUST00000219598,ENSMUST00000219661,ENSMUST00000219717,ENSMUST00000219960	leukocyte immunoglobulin-like receptor, subfamily B, member 4B	14727	Lilr4b	1.82819
ENSMUSG00000034664	ENSMUST00000103086,ENSMUST00000124767,ENSMUST00000128752,ENSMUST00000130433,ENSMUST00000130757,ENSMUST00000131247,ENSMUST00000134735,ENSMUST00000145925,ENSMUST00000149519,ENSMUST00000151625	integrin alpha 2b	16399	Itga2b	1.82924
ENSMUSG00000111623	ENSMUST00000215491	predicted gene, 48303	NA	Gm48303	1.83102
ENSMUSG00000018168	ENSMUST00000103141,ENSMUST00000140876,ENSMUST00000152400,ENSMUST00000153902	IKAROS family zinc finger 3	22780	Ikzf3	1.83223
ENSMUSG00000028859	ENSMUST00000030673,ENSMUST00000106162,ENSMUST00000140426,ENSMUST00000153968	colony stimulating factor 3 receptor (granulocyte)	12986	Csf3r	1.83782
ENSMUSG00000021876	ENSMUST00000022428,ENSMUST00000169895	ribonuclease, RNase A family 4	58809	Rnase4	1.84188
ENSMUSG00000001761	ENSMUST00000001812,ENSMUST00000201515	smoothened, frizzled class receptor	319757	Smo	1.84711
ENSMUSG00000069041	ENSMUST00000091184	solute carrier family 25 (mitochondrial carrier; adenine nucleotide translocator), member 31	73333	Slc25a31	1.85
ENSMUSG00000009876	ENSMUST00000010020,ENSMUST00000109821	cytochrome c oxidase subunit 4I2	84682	Cox4i2	1.85006
ENSMUSG00000109559	ENSMUST00000208250	predicted gene, 34280	NA	Gm34280	1.85099
ENSMUSG00000035105	ENSMUST00000039516	egl-9 family hypoxia-inducible factor 3	112407	Egln3	1.86066
ENSMUSG00000102850	ENSMUST00000192629	predicted gene, 37082	NA	Gm37082	1.86536
ENSMUSG00000049791	ENSMUST00000058755	frizzled class receptor 4	14366	Fzd4	1.87764
ENSMUSG00000018752	ENSMUST00000108649,ENSMUST00000174159,ENSMUST00000180587	tumor necrosis factor (ligand) superfamily, membrane-bound member 13	619441	Tnfsfm13	1.87853
ENSMUSG00000057191	ENSMUST00000076326,ENSMUST00000086361,ENSMUST00000173769	cDNA sequence AB124611	382062	AB124611	1.8801
ENSMUSG00000024905	ENSMUST00000025840,ENSMUST00000127142,ENSMUST00000142193,ENSMUST00000151341	testis expressed metallothionein like	17771	Tesmin	1.88671
ENSMUSG00000031824	ENSMUST00000034281,ENSMUST00000108948,ENSMUST00000108950,ENSMUST00000108951,ENSMUST00000132229,ENSMUST00000144682,ENSMUST00000153725,ENSMUST00000212268,ENSMUST00000212474	RIKEN cDNA 6430548M08 gene	234797	6430548M08Rik	1.88743
ENSMUSG00000031762	ENSMUST00000034214,ENSMUST00000212806	metallothionein 2	17750	Mt2	1.89346
ENSMUSG00000034039	ENSMUST00000024993,ENSMUST00000234609	protease, serine 29	114662	Prss29	1.89498
ENSMUSG00000072596	ENSMUST00000074839	eosinophil-associated, ribonuclease A family, member 2	13587	Ear2	1.8965
ENSMUSG00000071234	ENSMUST00000095550,ENSMUST00000221793,ENSMUST00000221905,ENSMUST00000222422	synapse differentiation inducing 1 like	627191	Syndig1l	1.89919
ENSMUSG00000045625	ENSMUST00000052174,ENSMUST00000134666,ENSMUST00000134928,ENSMUST00000151412	phosphatidylinositol glycan anchor biosynthesis, class Z	239827	Pigz	1.89961
ENSMUSG00000015222	ENSMUST00000024639,ENSMUST00000077355,ENSMUST00000114012,ENSMUST00000114013,ENSMUST00000114015,ENSMUST00000114017,ENSMUST00000114018,ENSMUST00000123647,ENSMUST00000124873,ENSMUST00000125844,ENSMUST00000127388,ENSMUST00000128673,ENSMUST00000133522,ENSMUST00000137807,ENSMUST00000141148,ENSMUST00000145419,ENSMUST00000151423,ENSMUST00000156636,ENSMUST00000172486,ENSMUST00000172886,ENSMUST00000173778,…	microtubule-associated protein 2	17756	Map2	1.90065
ENSMUSG00000017607	ENSMUST00000017751,ENSMUST00000107465,ENSMUST00000123303,ENSMUST00000153351	tensin 4	217169	Tns4	1.90158
ENSMUSG00000004631	ENSMUST00000004750,ENSMUST00000090686,ENSMUST00000101677,ENSMUST00000115577,ENSMUST00000115579,ENSMUST00000123907,ENSMUST00000126151,ENSMUST00000128109,ENSMUST00000133306,ENSMUST00000139029,ENSMUST00000153284,ENSMUST00000203556,ENSMUST00000204897	sarcoglycan, epsilon	20392	Sgce	1.90886
ENSMUSG00000030117	ENSMUST00000032211,ENSMUST00000204882	growth differentiation factor 3	14562	Gdf3	1.90988
ENSMUSG00000017466	ENSMUST00000017610,ENSMUST00000155707	tissue inhibitor of metalloproteinase 2	21858	Timp2	1.9123
ENSMUSG00000015846	ENSMUST00000077257,ENSMUST00000100251,ENSMUST00000113934,ENSMUST00000129514,ENSMUST00000148756,ENSMUST00000166775,ENSMUST00000238859,ENSMUST00000238913	retinoid X receptor alpha	20181	Rxra	1.91345
ENSMUSG00000038304	ENSMUST00000047702,ENSMUST00000107074,ENSMUST00000165991	CD160 antigen	54215	Cd160	1.91514
ENSMUSG00000021221	ENSMUST00000133282,ENSMUST00000140327,ENSMUST00000144237,ENSMUST00000147469,ENSMUST00000177801,ENSMUST00000177959,ENSMUST00000178756	D4, zinc and double PHD fingers, family 3	70127	Dpf3	1.91856
ENSMUSG00000024066	ENSMUST00000024866,ENSMUST00000232717,ENSMUST00000232783,ENSMUST00000232843,ENSMUST00000232957,ENSMUST00000233162,ENSMUST00000233352,ENSMUST00000233392,ENSMUST00000233433,ENSMUST00000233449,ENSMUST00000233570,ENSMUST00000233621,ENSMUST00000233807,ENSMUST00000233946	xanthine dehydrogenase	22436	Xdh	1.92633
ENSMUSG00000038578	ENSMUST00000040166,ENSMUST00000107544,ENSMUST00000136077,ENSMUST00000136562,ENSMUST00000136942	sushi domain containing 1	634731	Susd1	1.927
ENSMUSG00000038147	ENSMUST00000042302,ENSMUST00000128189,ENSMUST00000135386,ENSMUST00000136479,ENSMUST00000155802	CD84 antigen	12523	Cd84	1.92873
ENSMUSG00000021806	ENSMUST00000022340,ENSMUST00000224057,ENSMUST00000224263,ENSMUST00000225791	nidogen 2	18074	Nid2	1.93028
ENSMUSG00000079852	ENSMUST00000119096	killer cell lectin-like receptor, subfamily A, member 4	16635	Klra4	1.93042
ENSMUSG00000019122	ENSMUST00000019266,ENSMUST00000136131	chemokine (C-C motif) ligand 9	20308	Ccl9	1.93112
ENSMUSG00000068227	ENSMUST00000089398,ENSMUST00000163494	interleukin 2 receptor, beta chain	16185	Il2rb	1.93139
ENSMUSG00000040950	ENSMUST00000041550,ENSMUST00000108584,ENSMUST00000132645,ENSMUST00000147502,ENSMUST00000165951	macrophage galactose N-acetyl-galactosamine specific lectin 2	216864	Mgl2	1.93222
ENSMUSG00000012519	ENSMUST00000056157,ENSMUST00000120432,ENSMUST00000135710,ENSMUST00000145862	mixed lineage kinase domain-like	74568	Mlkl	1.9327
ENSMUSG00000020057	ENSMUST00000020249,ENSMUST00000138159,ENSMUST00000156097	DNA-damage regulated autophagy modulator 1	71712	Dram1	1.94031
ENSMUSG00000032204	ENSMUST00000060917,ENSMUST00000074465,ENSMUST00000113570,ENSMUST00000133239,ENSMUST00000135892,ENSMUST00000136798,ENSMUST00000138364,ENSMUST00000139495,ENSMUST00000144618,ENSMUST00000153050	aquaporin 9	64008	Aqp9	1.94301
ENSMUSG00000024451	ENSMUST00000042944,ENSMUST00000235391,ENSMUST00000236134,ENSMUST00000236534,ENSMUST00000236588,ENSMUST00000236772,ENSMUST00000237188,ENSMUST00000237272,ENSMUST00000237677	ArfGAP with RhoGAP domain, ankyrin repeat and PH domain 3	106952	Arap3	1.946
ENSMUSG00000019055	ENSMUST00000019199,ENSMUST00000105712,ENSMUST00000124041,ENSMUST00000124292,ENSMUST00000132075,ENSMUST00000149129	procollagen-lysine, 2-oxoglutarate 5-dioxygenase 1	18822	Plod1	1.94874
ENSMUSG00000026177	ENSMUST00000027368,ENSMUST00000127487,ENSMUST00000131511,ENSMUST00000133896,ENSMUST00000134189,ENSMUST00000135137,ENSMUST00000136786,ENSMUST00000147233,ENSMUST00000149166,ENSMUST00000155865,ENSMUST00000187516	solute carrier family 11 (proton-coupled divalent metal ion transporters), member 1	18173	Slc11a1	1.96109
ENSMUSG00000044258	ENSMUST00000021880,ENSMUST00000223750,ENSMUST00000224054,ENSMUST00000225385,ENSMUST00000225498,ENSMUST00000225762,ENSMUST00000225856,ENSMUST00000225966,ENSMUST00000226023	cytotoxic T lymphocyte-associated protein 2 alpha	13024	Ctla2a	1.96148
ENSMUSG00000078763	ENSMUST00000037994	schlafen 1	20555	Slfn1	1.96329
ENSMUSG00000010307	ENSMUST00000010451,ENSMUST00000211066	transmembrane protein 86A	67893	Tmem86a	1.96825
ENSMUSG00000029759	ENSMUST00000031773,ENSMUST00000125686,ENSMUST00000129344,ENSMUST00000156848,ENSMUST00000176039,ENSMUST00000176948	paraoxonase 3	269823	Pon3	1.97124
ENSMUSG00000027488	ENSMUST00000028991,ENSMUST00000109728,ENSMUST00000133018	syntrophin, acidic 1	20648	Snta1	1.97253
ENSMUSG00000081723	ENSMUST00000118066	predicted gene 15931	18729	Gm15931	1.98284
ENSMUSG00000048138	ENSMUST00000053068	doublesex and mab-3 related transcription factor 2	226049	Dmrt2	1.98701
ENSMUSG00000032265	ENSMUST00000034802,ENSMUST00000187711	terminal nucleotidyltransferase 5A	212943	Tent5a	1.99734
ENSMUSG00000112148	ENSMUST00000078778,ENSMUST00000217705,ENSMUST00000218217,ENSMUST00000218340,ENSMUST00000218617,ENSMUST00000218753,ENSMUST00000219029,ENSMUST00000219175,ENSMUST00000219388,ENSMUST00000219848,ENSMUST00000220166,ENSMUST00000220182,ENSMUST00000220226,ENSMUST00000220402	leukocyte immunoglobulin-like receptor, subfamily B, member 4A	14728	Lilrb4a	2.00361
ENSMUSG00000062373	ENSMUST00000072113,ENSMUST00000226578	transmembrane protein 65	74868	Tmem65	2.01055
ENSMUSG00000018927	ENSMUST00000019071,ENSMUST00000138145,ENSMUST00000150243	chemokine (C-C motif) ligand 6	20305	Ccl6	2.01085
ENSMUSG00000047793	ENSMUST00000062202,ENSMUST00000163688,ENSMUST00000165843,ENSMUST00000165883,ENSMUST00000168122,ENSMUST00000172289	sushi, nidogen and EGF-like domains 1	208777	Sned1	2.01551
ENSMUSG00000068407	ENSMUST00000089798,ENSMUST00000227764	ribonuclease, RNase A family, 12 (non-active)	497106	Rnase12	2.01867
ENSMUSG00000026473	ENSMUST00000086199,ENSMUST00000139476,ENSMUST00000140685,ENSMUST00000153134,ENSMUST00000154576	glutamate-ammonia ligase (glutamine synthetase)	14645	Glul	2.02842
ENSMUSG00000060470	ENSMUST00000051259,ENSMUST00000211974,ENSMUST00000211994,ENSMUST00000212558,ENSMUST00000212570,ENSMUST00000212951	adhesion G protein-coupled receptor G3	54672	Adgrg3	2.03505
ENSMUSG00000022822	ENSMUST00000077867,ENSMUST00000079158,ENSMUST00000096199,ENSMUST00000115547,ENSMUST00000127582,ENSMUST00000128978,ENSMUST00000134413,ENSMUST00000134962,ENSMUST00000137985,ENSMUST00000148003,ENSMUST00000150340,ENSMUST00000231522,ENSMUST00000232044	ATP-binding cassette, sub-family C (CFTR/MRP), member 5	27416	Abcc5	2.03817
ENSMUSG00000117789	ENSMUST00000236560	NA	NA	Gm50388	2.0424
ENSMUSG00000021190	ENSMUST00000021607,ENSMUST00000110020,ENSMUST00000146499	legumain	19141	Lgmn	2.05269
ENSMUSG00000024379	ENSMUST00000025237,ENSMUST00000234876	thymic stromal lymphopoietin	53603	Tslp	2.05294
ENSMUSG00000020108	ENSMUST00000020308	DNA-damage-inducible transcript 4	74747	Ddit4	2.06203
ENSMUSG00000097328	ENSMUST00000181261,ENSMUST00000181810	tumor necrosis factor (ligand) superfamily, member 12	21944	Tnfsf12	2.06325
ENSMUSG00000024672	ENSMUST00000025574,ENSMUST00000056035,ENSMUST00000067532,ENSMUST00000159269,ENSMUST00000162785	membrane-spanning 4-domains, subfamily A, member 7	109225	Ms4a7	2.06552
ENSMUSG00000078780	ENSMUST00000108347,ENSMUST00000194367	predicted gene 5150	381484	Gm5150	2.07015
ENSMUSG00000098050	ENSMUST00000183076	predicted gene 5345	NA	Gm5345	2.08337
ENSMUSG00000063193	ENSMUST00000106581,ENSMUST00000126655,ENSMUST00000149663,ENSMUST00000239005	CD300 molecule like family member B	217304	Cd300lb	2.0872
ENSMUSG00000094626	ENSMUST00000178687	transmembrane protein 121B	94047	Tmem121b	2.09871
ENSMUSG00000011008	ENSMUST00000011152,ENSMUST00000098524,ENSMUST00000169533,ENSMUST00000169984,ENSMUST00000170972	mucolipin 2	68279	Mcoln2	2.09971
ENSMUSG00000029925	ENSMUST00000003017,ENSMUST00000159226,ENSMUST00000160963,ENSMUST00000161360,ENSMUST00000161781,ENSMUST00000162521,ENSMUST00000162656	thromboxane A synthase 1, platelet	21391	Tbxas1	2.10373
ENSMUSG00000050953	ENSMUST00000068581,ENSMUST00000217789,ENSMUST00000218444,ENSMUST00000218760,ENSMUST00000218834,ENSMUST00000220069,ENSMUST00000220194,ENSMUST00000220204	gap junction protein, alpha 1	14609	Gja1	2.10468
ENSMUSG00000090307	ENSMUST00000164150,ENSMUST00000167672,ENSMUST00000169733,ENSMUST00000172072	RIKEN cDNA 1700071M16 gene	73504	1700071M16Rik	2.10601
ENSMUSG00000070323	ENSMUST00000120900,ENSMUST00000151853,ENSMUST00000152878	matrix metallopeptidase 27	234911	Mmp27	2.10673
ENSMUSG00000064147	ENSMUST00000087942,ENSMUST00000132262,ENSMUST00000139931,ENSMUST00000141239,ENSMUST00000233567,ENSMUST00000233717,ENSMUST00000233860	RAB44, member RAS oncogene family	442827	Rab44	2.11818
ENSMUSG00000027401	ENSMUST00000110299	transglutaminase 3, E polypeptide	21818	Tgm3	2.13387
ENSMUSG00000033871	ENSMUST00000063307,ENSMUST00000075299,ENSMUST00000142134	peroxisome proliferative activated receptor, gamma, coactivator 1 beta	170826	Ppargc1b	2.13608
ENSMUSG00000058794	ENSMUST00000075192,ENSMUST00000131364,ENSMUST00000132438,ENSMUST00000132836,ENSMUST00000133600,ENSMUST00000134193,ENSMUST00000134554,ENSMUST00000149111,ENSMUST00000154510,ENSMUST00000156927	nuclear factor, erythroid derived 2	18022	Nfe2	2.13702
ENSMUSG00000076655	ENSMUST00000103464	immunoglobulin heavy variable 4-1	NA	Ighv4-1	2.14169
ENSMUSG00000034993	ENSMUST00000040430	vesicle amine transport 1	26949	Vat1	2.148
ENSMUSG00000029781	ENSMUST00000031795,ENSMUST00000147159	FK506 binding protein 9	27055	Fkbp9	2.14996
ENSMUSG00000001865	ENSMUST00000001921,ENSMUST00000191659	carboxypeptidase A3, mast cell	12873	Cpa3	2.15535
ENSMUSG00000037106	ENSMUST00000159177,ENSMUST00000159705,ENSMUST00000161028	fer-1-like 6 (C. elegans)	631797	Fer1l6	2.1687
ENSMUSG00000095609	ENSMUST00000178618,ENSMUST00000224147,ENSMUST00000224713,ENSMUST00000225638	predicted gene, 21188	100861753	Gm21188	2.17349
ENSMUSG00000030769	ENSMUST00000033035,ENSMUST00000127655,ENSMUST00000131209,ENSMUST00000131461,ENSMUST00000131933,ENSMUST00000140721,ENSMUST00000167299,ENSMUST00000206180	solute carrier family 5 (sodium/glucose cotransporter), member 11	233836	Slc5a11	2.17628
ENSMUSG00000060621	ENSMUST00000078908,ENSMUST00000207576,ENSMUST00000214205	NTPase, KAP family P-loop domain containing 1	69547	Nkpd1	2.17944
ENSMUSG00000096336	ENSMUST00000103303	immunoglobulin kappa variable 1-135	NA	Igkv1-135	2.18171
ENSMUSG00000042251	ENSMUST00000048660,ENSMUST00000112393,ENSMUST00000132450,ENSMUST00000152989	peptidase M20 domain containing 1	212933	Pm20d1	2.1834
ENSMUSG00000087450	ENSMUST00000137397	predicted gene 13994	NA	Gm13994	2.1844
ENSMUSG00000049807	ENSMUST00000093940,ENSMUST00000107601,ENSMUST00000121799,ENSMUST00000142465,ENSMUST00000152933	Rho GTPase activating protein 23	58996	Arhgap23	2.19571
ENSMUSG00000029869	ENSMUST00000114732,ENSMUST00000167082,ENSMUST00000167497,ENSMUST00000170624	Eph receptor B6	13848	Ephb6	2.20298
ENSMUSG00000008843	ENSMUST00000008987	claudin 13	57255	Cldn13	2.20836
ENSMUSG00000047528	ENSMUST00000055313,ENSMUST00000185953,ENSMUST00000188772,ENSMUST00000188839,ENSMUST00000191252,ENSMUST00000191565	amyotrophic lateral sclerosis 2 chromosome region 12	108812	Flacc1	2.21184
ENSMUSG00000027624	ENSMUST00000029155,ENSMUST00000103136,ENSMUST00000103137,ENSMUST00000109574,ENSMUST00000109577,ENSMUST00000125153,ENSMUST00000137067,ENSMUST00000142048,ENSMUST00000144013	erythrocyte membrane protein band 4.1 like 1	13821	Epb41l1	2.21684
ENSMUSG00000031698	ENSMUST00000034133,ENSMUST00000121972,ENSMUST00000122452,ENSMUST00000137290,ENSMUST00000138825	myosin light chain kinase 3	213435	Mylk3	2.21782
ENSMUSG00000056501	ENSMUST00000070642	CCAAT/enhancer binding protein (C/EBP), beta	12608	Cebpb	2.227
ENSMUSG00000020042	ENSMUST00000020231,ENSMUST00000105306,ENSMUST00000105307,ENSMUST00000128338,ENSMUST00000135235,ENSMUST00000145323,ENSMUST00000145433,ENSMUST00000156123	BTB (POZ) domain containing 11	74007	Btbd11	2.22739
ENSMUSG00000026986	ENSMUST00000051416,ENSMUST00000114497,ENSMUST00000114498	histamine N-methyltransferase	140483	Hnmt	2.23084
ENSMUSG00000041842	ENSMUST00000091002,ENSMUST00000107689,ENSMUST00000125643,ENSMUST00000131065,ENSMUST00000194027	FH2 domain containing 1	229474	Fhdc1	2.23149
ENSMUSG00000049409	ENSMUST00000050887,ENSMUST00000203636,ENSMUST00000204682	prokineticin receptor 1	58182	Prokr1	2.23339
ENSMUSG00000027860	ENSMUST00000029453,ENSMUST00000159388,ENSMUST00000159586,ENSMUST00000160226,ENSMUST00000161021,ENSMUST00000161722,ENSMUST00000162361,ENSMUST00000168312	VANGL planar cell polarity 1	229658	Vangl1	2.23562
ENSMUSG00000037071	ENSMUST00000041331,ENSMUST00000235741,ENSMUST00000236824	stearoyl-Coenzyme A desaturase 1	20249	Scd1	2.23644
ENSMUSG00000091119	ENSMUST00000165386,ENSMUST00000226261,ENSMUST00000228405	coiled-coil domain containing 152	100039139	Ccdc152	2.24315
ENSMUSG00000020681	ENSMUST00000001963,ENSMUST00000001964,ENSMUST00000132280,ENSMUST00000151657	angiotensin I converting enzyme (peptidyl-dipeptidase A) 1	11421	Ace	2.25104
ENSMUSG00000069170	ENSMUST00000095585,ENSMUST00000109565,ENSMUST00000125663,ENSMUST00000125698,ENSMUST00000126444,ENSMUST00000128120,ENSMUST00000128585,ENSMUST00000129725,ENSMUST00000132045,ENSMUST00000146141,ENSMUST00000146749,ENSMUST00000156627,ENSMUST00000156631,ENSMUST00000224088	adhesion G protein-coupled receptor V1	110789	Adgrv1	2.25465
ENSMUSG00000000903	ENSMUST00000000926,ENSMUST00000121151	pre-B lymphocyte gene 3	22364	Vpreb3	2.25872
ENSMUSG00000019478	ENSMUST00000117702,ENSMUST00000118535,ENSMUST00000212846	RAB4A, member RAS oncogene family	19341	Rab4a	2.26847
ENSMUSG00000097585	ENSMUST00000181784,ENSMUST00000207458,ENSMUST00000208028,ENSMUST00000208266,ENSMUST00000208362,ENSMUST00000208547	RIKEN cDNA E230029C05 gene	319711	E230029C05Rik	2.2688
ENSMUSG00000036362	ENSMUST00000040622	purinergic receptor P2Y, G-protein coupled 13	74191	P2ry13	2.28064
ENSMUSG00000048498	ENSMUST00000062787	CD300E molecule	217306	Cd300e	2.2955
ENSMUSG00000036353	ENSMUST00000050360,ENSMUST00000170388,ENSMUST00000196583,ENSMUST00000199609,ENSMUST00000199675	purinergic receptor P2Y, G-protein coupled 12	70839	P2ry12	2.30169
ENSMUSG00000091694	ENSMUST00000166623,ENSMUST00000180949,ENSMUST00000181154,ENSMUST00000181467	apolipoprotein L 11b	328563	Apol11b	2.30326
ENSMUSG00000066363	ENSMUST00000101080,ENSMUST00000121337,ENSMUST00000167049	serine (or cysteine) peptidase inhibitor, clade A, member 3F	238393	Serpina3f	2.30555
ENSMUSG00000028825	ENSMUST00000030627,ENSMUST00000136163	Rh blood group, D antigen	19746	Rhd	2.31013
ENSMUSG00000086763	ENSMUST00000150314	plexin A4, opposite strand 1	319849	Plxna4os1	2.31439
ENSMUSG00000055782	ENSMUST00000069511,ENSMUST00000229909,ENSMUST00000230461	ATP-binding cassette, sub-family D (ALD), member 2	26874	Abcd2	2.31919
ENSMUSG00000032387	ENSMUST00000055844,ENSMUST00000169003,ENSMUST00000213927,ENSMUST00000216342,ENSMUST00000216382,ENSMUST00000216769	RNA binding protein with multiple splicing 2	71973	Rbpms2	2.32099
ENSMUSG00000116896	ENSMUST00000232026	NA	NA	Gm49792	2.3267
ENSMUSG00000029059	ENSMUST00000030935,ENSMUST00000123513,ENSMUST00000132281	peroxiredoxin like 2B	66469	Prxl2b	2.33716
ENSMUSG00000114608	ENSMUST00000224554	NA	NA	Gm36161	2.35209
ENSMUSG00000010660	ENSMUST00000010804,ENSMUST00000213464,ENSMUST00000214470,ENSMUST00000214491	phospholipase C, delta 1	18799	Plcd1	2.36292
ENSMUSG00000008153	ENSMUST00000008297,ENSMUST00000112523,ENSMUST00000124998,ENSMUST00000143283,ENSMUST00000147947,ENSMUST00000150774,ENSMUST00000156040,ENSMUST00000238807,ENSMUST00000239139	calsyntenin 3	232370	Clstn3	2.37382
ENSMUSG00000002992	ENSMUST00000003074,ENSMUST00000134116,ENSMUST00000142352	apolipoprotein C-II	11813	Apoc2	2.38375
ENSMUSG00000051354	ENSMUST00000060716,ENSMUST00000164660,ENSMUST00000218301,ENSMUST00000219318,ENSMUST00000219738,ENSMUST00000220219	sterile alpha motif domain containing 3	268288	Samd3	2.38467
ENSMUSG00000043740	ENSMUST00000049614,ENSMUST00000124205,ENSMUST00000129825	RIKEN cDNA B430306N03 gene	320148	B430306N03Rik	2.38509
ENSMUSG00000022818	ENSMUST00000023513,ENSMUST00000182508,ENSMUST00000182669,ENSMUST00000182736,ENSMUST00000182741	cytochrome P450, family 2, subfamily ab, polypeptide 1	224044	Cyp2ab1	2.39012
ENSMUSG00000037966	ENSMUST00000049022,ENSMUST00000120733,ENSMUST00000131280,ENSMUST00000150555,ENSMUST00000153819	ninjurin 1	18081	Ninj1	2.3906
ENSMUSG00000048330	ENSMUST00000055993,ENSMUST00000120876,ENSMUST00000129629,ENSMUST00000133876,ENSMUST00000137385,ENSMUST00000147580	RIC3 acetylcholine receptor chaperone	320360	Ric3	2.3917
ENSMUSG00000079484	ENSMUST00000085290,ENSMUST00000091132,ENSMUST00000113643,ENSMUST00000113645,ENSMUST00000127689,ENSMUST00000129512,ENSMUST00000133877,ENSMUST00000138254,ENSMUST00000139719,ENSMUST00000147204,ENSMUST00000150695,ENSMUST00000154647,ENSMUST00000154988	phytanoyl-CoA dioxygenase domain containing 1	227696	Phyhd1	2.40546
ENSMUSG00000102202	ENSMUST00000193983	predicted gene, 33280	NA	Gm33280	2.41132
ENSMUSG00000085890	ENSMUST00000140371,ENSMUST00000144033,ENSMUST00000145435	tumor necrosis factor (ligand) superfamily, member 13, opposite strand	NA	Tnfsf13os	2.41309
ENSMUSG00000038508	ENSMUST00000003808,ENSMUST00000110103	growth differentiation factor 15	23886	Gdf15	2.4309
ENSMUSG00000035472	ENSMUST00000044634,ENSMUST00000110680,ENSMUST00000160709,ENSMUST00000160892,ENSMUST00000217690	solute carrier family 25 (mitochondrial oxodicarboxylate carrier), member 21	217593	Slc25a21	2.43118
ENSMUSG00000030147	ENSMUST00000077228,ENSMUST00000078559	C-type lectin domain family 4, member b1	69810	Clec4b1	2.43886
ENSMUSG00000009545	ENSMUST00000009689,ENSMUST00000185383,ENSMUST00000186284,ENSMUST00000186288,ENSMUST00000186488,ENSMUST00000186798,ENSMUST00000187213	potassium voltage-gated channel, subfamily Q, member 1	16535	Kcnq1	2.44538
ENSMUSG00000022468	ENSMUST00000023105,ENSMUST00000100249,ENSMUST00000230430	endonuclease, polyU-specific	19011	Endou	2.44857
ENSMUSG00000022272	ENSMUST00000022882,ENSMUST00000110457,ENSMUST00000124966,ENSMUST00000125667,ENSMUST00000126076,ENSMUST00000127486,ENSMUST00000130517,ENSMUST00000131834,ENSMUST00000135173,ENSMUST00000135981,ENSMUST00000137601,ENSMUST00000145587,ENSMUST00000151360	myosin X	17909	Myo10	2.458
ENSMUSG00000038663	ENSMUST00000042318	fibronectin type III and SPRY domain containing 2	244091	Fsd2	2.47246
ENSMUSG00000030761	ENSMUST00000084979,ENSMUST00000107122,ENSMUST00000107127,ENSMUST00000107128,ENSMUST00000124787,ENSMUST00000131632,ENSMUST00000138627,ENSMUST00000149079,ENSMUST00000152975,ENSMUST00000153657,ENSMUST00000155637,ENSMUST00000156992,ENSMUST00000205746,ENSMUST00000238309,ENSMUST00000238540	myosin VIIA	17921	Myo7a	2.47274
ENSMUSG00000032554	ENSMUST00000035158,ENSMUST00000112503,ENSMUST00000112645,ENSMUST00000126359,ENSMUST00000164377,ENSMUST00000165296,ENSMUST00000168142,ENSMUST00000170904,ENSMUST00000190051	transferrin	22041	Trf	2.48131
ENSMUSG00000058624	ENSMUST00000087600,ENSMUST00000121725,ENSMUST00000136258,ENSMUST00000237823	guanine deaminase	14544	Gda	2.48927
ENSMUSG00000029287	ENSMUST00000031224,ENSMUST00000136882,ENSMUST00000138469,ENSMUST00000146591	transforming growth factor, beta receptor III	21814	Tgfbr3	2.49015
ENSMUSG00000023828	ENSMUST00000024595,ENSMUST00000233535	solute carrier family 22 (organic cation transporter), member 3	20519	Slc22a3	2.52431
ENSMUSG00000045502	ENSMUST00000057145	hydroxycarboxylic acid receptor 2	80885	Hcar2	2.52542
ENSMUSG00000030084	ENSMUST00000049845,ENSMUST00000163139,ENSMUST00000204468,ENSMUST00000204997,ENSMUST00000205121,ENSMUST00000205230	plexin A1	18844	Plxna1	2.53241
ENSMUSG00000021573	ENSMUST00000022057,ENSMUST00000140217	tubulin polymerization promoting protein	72948	Tppp	2.53879
ENSMUSG00000023995	ENSMUST00000024794,ENSMUST00000159478,ENSMUST00000159988,ENSMUST00000160259,ENSMUST00000162481	translocator protein 2	70026	Tspo2	2.54083
ENSMUSG00000051497	ENSMUST00000106635,ENSMUST00000106636,ENSMUST00000125692,ENSMUST00000150902,ENSMUST00000178798,ENSMUST00000180023	potassium inwardly-rectifying channel, subfamily J, member 16	16517	Kcnj16	2.54113
ENSMUSG00000031451	ENSMUST00000033828	growth arrest specific 6	14456	Gas6	2.54621
ENSMUSG00000039959	ENSMUST00000060311,ENSMUST00000200808,ENSMUST00000200898,ENSMUST00000201479,ENSMUST00000201998,ENSMUST00000202044,ENSMUST00000202095,ENSMUST00000202236,ENSMUST00000202643,ENSMUST00000212301	huntingtin interacting protein 1	215114	Hip1	2.5471
ENSMUSG00000086548	ENSMUST00000152986	predicted gene 12972	NA	Gm12972	2.54746
ENSMUSG00000039005	ENSMUST00000048096,ENSMUST00000107365,ENSMUST00000143580,ENSMUST00000147008	toll-like receptor 4	21898	Tlr4	2.57529
ENSMUSG00000045777	ENSMUST00000059223,ENSMUST00000084412,ENSMUST00000105988,ENSMUST00000123543,ENSMUST00000131791,ENSMUST00000140032	interferon induced transmembrane protein 10	320802	Ifitm10	2.57597
ENSMUSG00000000244	ENSMUST00000009396,ENSMUST00000075172,ENSMUST00000082008,ENSMUST00000105923,ENSMUST00000105924,ENSMUST00000105925,ENSMUST00000141186,ENSMUST00000143512,ENSMUST00000145212,ENSMUST00000154264,ENSMUST00000207211,ENSMUST00000207449	tetraspanin 32	27027	Tspan32	2.58056
ENSMUSG00000060703	ENSMUST00000028356,ENSMUST00000074606	CD302 antigen	66205	Cd302	2.58466
ENSMUSG00000043832	ENSMUST00000088468,ENSMUST00000117173,ENSMUST00000204427	C-type lectin domain family 4, member a3	73149	Clec4a3	2.58697
ENSMUSG00000073489	ENSMUST00000111214,ENSMUST00000192414	interferon activated gene 204	15951	Ifi204	2.5961
ENSMUSG00000020614	ENSMUST00000020938,ENSMUST00000144972,ENSMUST00000146408,ENSMUST00000155559	family with sequence similarity 20, member A	208659	Fam20a	2.60282
ENSMUSG00000035711	ENSMUST00000047877,ENSMUST00000223563,ENSMUST00000223944	docking protein 3	27261	Dok3	2.60868
ENSMUSG00000025150	ENSMUST00000026148,ENSMUST00000149450,ENSMUST00000154479,ENSMUST00000154565	carbonyl reductase 2	12409	Cbr2	2.62224
ENSMUSG00000087362	ENSMUST00000126679,ENSMUST00000139492	predicted gene 13710	672763	Gm13710	2.63471
ENSMUSG00000054931	ENSMUST00000062609,ENSMUST00000225845	zinc finger with KRAB and SCAN domains 4	544922	Zkscan4	2.63713
ENSMUSG00000027399	ENSMUST00000028882	interleukin 1 alpha	16175	Il1a	2.64086
ENSMUSG00000092618	ENSMUST00000075483,ENSMUST00000173164	butyrophilin-like 6	624681	Btnl6	2.64695
ENSMUSG00000054932	ENSMUST00000042755,ENSMUST00000200693,ENSMUST00000200728,ENSMUST00000201061,ENSMUST00000202209	alpha fetoprotein	11576	Afp	2.64947
ENSMUSG00000018217	ENSMUST00000018361,ENSMUST00000108700,ENSMUST00000108701,ENSMUST00000108702,ENSMUST00000140648	peripheral myelin protein 22	18858	Pmp22	2.65178
ENSMUSG00000002808	ENSMUST00000002885,ENSMUST00000220755,ENSMUST00000220944,ENSMUST00000221014	ependymin related protein 1 (zebrafish)	105298	Epdr1	2.66002
ENSMUSG00000029866	ENSMUST00000031899,ENSMUST00000141502,ENSMUST00000153760,ENSMUST00000192118,ENSMUST00000194597	Kell blood group	23925	Kel	2.66498
ENSMUSG00000000440	ENSMUST00000000450,ENSMUST00000171644,ENSMUST00000203308,ENSMUST00000203732,ENSMUST00000203896,ENSMUST00000204305,ENSMUST00000205213	peroxisome proliferator activated receptor gamma	19016	Pparg	2.6705
ENSMUSG00000109713	ENSMUST00000211088	poliovirus receptor related immunoglobulin domain containing	102640920	Pvrig	2.67072
ENSMUSG00000024486	ENSMUST00000025363,ENSMUST00000236520,ENSMUST00000237621	heparin-binding EGF-like growth factor	15200	Hbegf	2.67436
ENSMUSG00000031714	ENSMUST00000034150,ENSMUST00000210676,ENSMUST00000211018	growth factor receptor bound protein 2-associated protein 1	14388	Gab1	2.67731
ENSMUSG00000023913	ENSMUST00000024706,ENSMUST00000163489,ENSMUST00000165706,ENSMUST00000167214,ENSMUST00000167418,ENSMUST00000169694	phospholipase A2, group VII (platelet-activating factor acetylhydrolase, plasma)	27226	Pla2g7	2.67795
ENSMUSG00000036264	ENSMUST00000036796	follistatin-like 4	320027	Fstl4	2.67997
ENSMUSG00000020227	ENSMUST00000020448,ENSMUST00000135106,ENSMUST00000140237,ENSMUST00000143100,ENSMUST00000145665	interleukin-1 receptor-associated kinase 3	73914	Irak3	2.69101
ENSMUSG00000024621	ENSMUST00000025523,ENSMUST00000115268,ENSMUST00000235447,ENSMUST00000237485,ENSMUST00000237706,ENSMUST00000237873	colony stimulating factor 1 receptor	12978	Csf1r	2.69342
ENSMUSG00000018459	ENSMUST00000029208,ENSMUST00000109279,ENSMUST00000143136,ENSMUST00000145513,ENSMUST00000147107	solute carrier family 13 (sodium-dependent dicarboxylate transporter), member 3	114644	Slc13a3	2.69672
ENSMUSG00000031385	ENSMUST00000002079,ENSMUST00000146812,ENSMUST00000147127,ENSMUST00000149478,ENSMUST00000155096	plexin B3	140571	Plxnb3	2.74387
ENSMUSG00000020889	ENSMUST00000064941,ENSMUST00000139220	nuclear receptor subfamily 1, group D, member 1	217166	Nr1d1	2.7511
ENSMUSG00000004151	ENSMUST00000095767,ENSMUST00000159334,ENSMUST00000160244,ENSMUST00000160701,ENSMUST00000160856,ENSMUST00000160996,ENSMUST00000161164,ENSMUST00000161513,ENSMUST00000161591,ENSMUST00000161980,ENSMUST00000162563,ENSMUST00000162730,ENSMUST00000220492	ets variant 1	14009	Etv1	2.75332
ENSMUSG00000018339	ENSMUST00000082430,ENSMUST00000125094,ENSMUST00000149324	glutathione peroxidase 3	14778	Gpx3	2.75871
ENSMUSG00000025375	ENSMUST00000064307,ENSMUST00000103019,ENSMUST00000103020,ENSMUST00000128836,ENSMUST00000132575,ENSMUST00000134319,ENSMUST00000136386,ENSMUST00000142959,ENSMUST00000150730	apoptosis-associated tyrosine kinase	11302	Aatk	2.75905
ENSMUSG00000029096	ENSMUST00000087629,ENSMUST00000114233,ENSMUST00000129459,ENSMUST00000137935,ENSMUST00000200810,ENSMUST00000201028	HtrA serine peptidase 3	78558	Htra3	2.76184
ENSMUSG00000022432	ENSMUST00000023068,ENSMUST00000227591	structural maintenance of chromosomes 1B	140557	Smc1b	2.79096
ENSMUSG00000060147	ENSMUST00000017188,ENSMUST00000043552,ENSMUST00000076532,ENSMUST00000164627,ENSMUST00000166354,ENSMUST00000167163,ENSMUST00000167237,ENSMUST00000167260,ENSMUST00000167597,ENSMUST00000168350,ENSMUST00000168400,ENSMUST00000170620,ENSMUST00000170991,ENSMUST00000171034,ENSMUST00000171252,ENSMUST00000171951,ENSMUST00000171985	serine (or cysteine) peptidase inhibitor, clade B, member 6a	20719	Serpinb6a	2.80602
ENSMUSG00000038776	ENSMUST00000036928,ENSMUST00000111068,ENSMUST00000147585,ENSMUST00000154133	epoxide hydrolase 1, microsomal	13849	Ephx1	2.82414
ENSMUSG00000005803	ENSMUST00000005953,ENSMUST00000110506,ENSMUST00000124460,ENSMUST00000126403,ENSMUST00000141698,ENSMUST00000147310,ENSMUST00000147475,ENSMUST00000176343,ENSMUST00000176999	sulfide quinone oxidoreductase	59010	Sqor	2.83692
ENSMUSG00000035441	ENSMUST00000041065,ENSMUST00000070997,ENSMUST00000125944	myosin ID	338367	Myo1d	2.83904
ENSMUSG00000007891	ENSMUST00000066401,ENSMUST00000151120,ENSMUST00000153679	cathepsin D	13033	Ctsd	2.84151
ENSMUSG00000030187	ENSMUST00000032306,ENSMUST00000088867	killer cell lectin-like receptor, subfamily A, member 2	16633	Klra2	2.85532
ENSMUSG00000003849	ENSMUST00000003947	NAD(P)H dehydrogenase, quinone 1	18104	Nqo1	2.85586
ENSMUSG00000024679	ENSMUST00000025582,ENSMUST00000125291,ENSMUST00000135351,ENSMUST00000155669	membrane-spanning 4-domains, subfamily A, member 6D	68774	Ms4a6d	2.86148
ENSMUSG00000026389	ENSMUST00000112639,ENSMUST00000112640,ENSMUST00000112641,ENSMUST00000112643,ENSMUST00000140490	STEAP family member 3	68428	Steap3	2.86928
ENSMUSG00000022562	ENSMUST00000023222,ENSMUST00000163127,ENSMUST00000163977,ENSMUST00000164189,ENSMUST00000165279,ENSMUST00000169664,ENSMUST00000170063,ENSMUST00000170261,ENSMUST00000171340,ENSMUST00000210024,ENSMUST00000230735	5-oxoprolinase (ATP-hydrolysing)	75475	Oplah	2.87384
ENSMUSG00000062515	ENSMUST00000029041,ENSMUST00000191757	fatty acid binding protein 4, adipocyte	11770	Fabp4	2.87797
ENSMUSG00000015053	ENSMUST00000015197,ENSMUST00000170089,ENSMUST00000203480,ENSMUST00000203579,ENSMUST00000205151	GATA binding protein 2	14461	Gata2	2.87898
ENSMUSG00000022057	ENSMUST00000022641	ADAM-like, decysin 1	58860	Adamdec1	2.88712
ENSMUSG00000041268	ENSMUST00000118163,ENSMUST00000118600,ENSMUST00000123709,ENSMUST00000127880,ENSMUST00000128865,ENSMUST00000144736,ENSMUST00000149709,ENSMUST00000154092	Dmx-like 2	235380	Dmxl2	2.90456
ENSMUSG00000032915	ENSMUST00000025004	adhesion G protein-coupled receptor E4	52614	Adgre4	2.90842
ENSMUSG00000024164	ENSMUST00000024988,ENSMUST00000176457,ENSMUST00000177046,ENSMUST00000177425	complement component 3	12266	C3	2.91756
ENSMUSG00000032942	ENSMUST00000032958,ENSMUST00000107059,ENSMUST00000128044,ENSMUST00000133850	uncoupling protein 3 (mitochondrial, proton carrier)	22229	Ucp3	2.92471
ENSMUSG00000049130	ENSMUST00000050770,ENSMUST00000168818,ENSMUST00000209442	complement component 5a receptor 1	12273	C5ar1	2.92488
ENSMUSG00000021892	ENSMUST00000091903,ENSMUST00000100730,ENSMUST00000140002,ENSMUST00000147586	SH3-domain binding protein 5 (BTK-associated)	24056	Sh3bp5	2.93304
ENSMUSG00000019838	ENSMUST00000092566,ENSMUST00000213488,ENSMUST00000213827,ENSMUST00000217252	solute carrier family 16 (monocarboxylic acid transporters), member 10	72472	Slc16a10	2.93476
ENSMUSG00000030159	ENSMUST00000032262,ENSMUST00000112079,ENSMUST00000112081,ENSMUST00000133061	C-type lectin domain family 1, member b	56760	Clec1b	2.94585
ENSMUSG00000029373	ENSMUST00000031320,ENSMUST00000201990,ENSMUST00000202625	platelet factor 4	56744	Pf4	2.95481
ENSMUSG00000031444	ENSMUST00000033821,ENSMUST00000063820,ENSMUST00000123768,ENSMUST00000128418,ENSMUST00000152034	coagulation factor X	14058	F10	2.95546
ENSMUSG00000040146	ENSMUST00000045726,ENSMUST00000213130,ENSMUST00000213558,ENSMUST00000214026,ENSMUST00000214089,ENSMUST00000214713,ENSMUST00000215851	ral guanine nucleotide dissociation stimulator-like 3	71746	Rgl3	2.95779
ENSMUSG00000059089	ENSMUST00000078825	Fc receptor, IgG, low affinity IV	246256	Fcgr4	2.96378
ENSMUSG00000028644	ENSMUST00000030396,ENSMUST00000124626,ENSMUST00000127574,ENSMUST00000133956,ENSMUST00000137080,ENSMUST00000138395,ENSMUST00000141227,ENSMUST00000150864,ENSMUST00000156746,ENSMUST00000239029	erythroblast membrane-associated protein	27028	Ermap	2.97995
ENSMUSG00000022899	ENSMUST00000023616,ENSMUST00000100308,ENSMUST00000163471,ENSMUST00000163964,ENSMUST00000164579,ENSMUST00000164770,ENSMUST00000165380,ENSMUST00000165531,ENSMUST00000166399,ENSMUST00000167909,ENSMUST00000167941,ENSMUST00000168279,ENSMUST00000169644,ENSMUST00000172382	solute carrier family 15 (H+/peptide transporter), member 2	57738	Slc15a2	2.994
ENSMUSG00000026994	ENSMUST00000028378,ENSMUST00000150793,ENSMUST00000153563,ENSMUST00000155453	polypeptide N-acetylgalactosaminyltransferase 3	14425	Galnt3	3.02243
ENSMUSG00000109245	ENSMUST00000208473	predicted gene 44860	NA	Gm44860	3.02813
ENSMUSG00000051439	ENSMUST00000061829,ENSMUST00000237042	CD14 antigen	12475	Cd14	3.03091
ENSMUSG00000024330	ENSMUST00000087497,ENSMUST00000114252,ENSMUST00000114255,ENSMUST00000131134,ENSMUST00000137374,ENSMUST00000143354,ENSMUST00000144927,ENSMUST00000173749,ENSMUST00000235819,ENSMUST00000236837,ENSMUST00000237490,ENSMUST00000237989	collagen, type XI, alpha 2	12815	Col11a2	3.03882
ENSMUSG00000029553	ENSMUST00000031533,ENSMUST00000200984,ENSMUST00000201104,ENSMUST00000201406,ENSMUST00000202997	transcription factor EC	21426	Tfec	3.04857
ENSMUSG00000067586	ENSMUST00000087978	sphingosine-1-phosphate receptor 3	13610	S1pr3	3.05424
ENSMUSG00000070873	ENSMUST00000117550	leukocyte immunoglobulin-like receptor, subfamily A (with TM domain), member 5	232801	Lilra5	3.06308
ENSMUSG00000042476	ENSMUST00000003717,ENSMUST00000196067,ENSMUST00000197150,ENSMUST00000197458,ENSMUST00000199954	ATP-binding cassette, sub-family B (MDR/TAP), member 4	18670	Abcb4	3.0664
ENSMUSG00000032564	ENSMUST00000057742,ENSMUST00000077190,ENSMUST00000098443,ENSMUST00000157006,ENSMUST00000213120,ENSMUST00000213452	copine IV	74020	Cpne4	3.06676
ENSMUSG00000038665	ENSMUST00000042075,ENSMUST00000090314,ENSMUST00000101532,ENSMUST00000136457,ENSMUST00000138286,ENSMUST00000143046,ENSMUST00000146656,ENSMUST00000150300	diacylglycerol kinase, iota	320127	Dgki	3.06828
ENSMUSG00000005089	ENSMUST00000005220,ENSMUST00000080210,ENSMUST00000111212,ENSMUST00000111213,ENSMUST00000123759,ENSMUST00000125085,ENSMUST00000128622,ENSMUST00000136221,ENSMUST00000136488,ENSMUST00000137466,ENSMUST00000145921,ENSMUST00000154446	solute carrier family 1 (glial high affinity glutamate transporter), member 2	20511	Slc1a2	3.07159
ENSMUSG00000019966	ENSMUST00000020129,ENSMUST00000105283,ENSMUST00000130190,ENSMUST00000218200,ENSMUST00000219050,ENSMUST00000219881	kit ligand	17311	Kitl	3.10155
ENSMUSG00000066684	ENSMUST00000110978,ENSMUST00000196195,ENSMUST00000197403,ENSMUST00000197914,ENSMUST00000198703,ENSMUST00000199387	paired immunoglobin-like type 2 receptor beta 1	170741	Pilrb1	3.10516
ENSMUSG00000070427	ENSMUST00000094134,ENSMUST00000209368,ENSMUST00000209844,ENSMUST00000211502	interleukin 18 binding protein	16068	Il18bp	3.10832
ENSMUSG00000083282	ENSMUST00000119694,ENSMUST00000235264,ENSMUST00000235354,ENSMUST00000235464,ENSMUST00000235931,ENSMUST00000236406,ENSMUST00000237011,ENSMUST00000237401,ENSMUST00000237504,ENSMUST00000237755,ENSMUST00000237784,ENSMUST00000238118	cathepsin F	56464	Ctsf	3.12162
ENSMUSG00000030088	ENSMUST00000032175,ENSMUST00000127199,ENSMUST00000130418,ENSMUST00000137669,ENSMUST00000152436,ENSMUST00000203111,ENSMUST00000204796	aldehyde dehydrogenase 1 family, member L1	107747	Aldh1l1	3.14071
ENSMUSG00000040466	ENSMUST00000037399,ENSMUST00000108357,ENSMUST00000108358,ENSMUST00000133750,ENSMUST00000153644,ENSMUST00000207799	biliverdin reductase B (flavin reductase (NADPH))	233016	Blvrb	3.17157
ENSMUSG00000025511	ENSMUST00000026585,ENSMUST00000117634,ENSMUST00000130402,ENSMUST00000138092,ENSMUST00000140858,ENSMUST00000146305,ENSMUST00000239217	tetraspanin 4	64540	Tspan4	3.18097
ENSMUSG00000064373	ENSMUST00000082424,ENSMUST00000159158,ENSMUST00000159216,ENSMUST00000159247,ENSMUST00000160311,ENSMUST00000160787,ENSMUST00000160930	selenoprotein P	20363	Selenop	3.211
ENSMUSG00000031785	ENSMUST00000093271,ENSMUST00000179619,ENSMUST00000211806,ENSMUST00000211850,ENSMUST00000211911,ENSMUST00000211944,ENSMUST00000211984,ENSMUST00000212118,ENSMUST00000212141,ENSMUST00000212531,ENSMUST00000212581,ENSMUST00000212660,ENSMUST00000212799,ENSMUST00000212956,ENSMUST00000212976,ENSMUST00000212995	adhesion G protein-coupled receptor G1	14766	Adgrg1	3.24126
ENSMUSG00000024663	ENSMUST00000113161,ENSMUST00000117641,ENSMUST00000121418,ENSMUST00000129882,ENSMUST00000131407,ENSMUST00000137637,ENSMUST00000144788,ENSMUST00000149967,ENSMUST00000238672	RAB3A interacting protein (rabin3)-like 1	74760	Rab3il1	3.26305
ENSMUSG00000032826	ENSMUST00000044443,ENSMUST00000104965,ENSMUST00000182008,ENSMUST00000182025,ENSMUST00000182050,ENSMUST00000182062,ENSMUST00000182064,ENSMUST00000182078,ENSMUST00000182118,ENSMUST00000182212,ENSMUST00000182271,ENSMUST00000182316,ENSMUST00000182452,ENSMUST00000182547,ENSMUST00000182571,ENSMUST00000182588,ENSMUST00000182610,ENSMUST00000182711,ENSMUST00000182876,ENSMUST00000182959,ENSMUST00000182994,…	ankyrin 2, brain	109676	Ank2	3.26311
ENSMUSG00000002985	ENSMUST00000003066,ENSMUST00000167646,ENSMUST00000172808,ENSMUST00000172983,ENSMUST00000173739,ENSMUST00000174064,ENSMUST00000174144,ENSMUST00000174191,ENSMUST00000174355,ENSMUST00000174710,ENSMUST00000207525	apolipoprotein E	11816	Apoe	3.27528
ENSMUSG00000026566	ENSMUST00000068705,ENSMUST00000111435,ENSMUST00000191818,ENSMUST00000192716,ENSMUST00000192848,ENSMUST00000193023,ENSMUST00000193172,ENSMUST00000193910,ENSMUST00000193948,ENSMUST00000194437,ENSMUST00000194829,ENSMUST00000195410	myelin protein zero-like 1	68481	Mpzl1	3.27907
ENSMUSG00000020654	ENSMUST00000020984,ENSMUST00000124505,ENSMUST00000127110,ENSMUST00000127756,ENSMUST00000134680,ENSMUST00000150944,ENSMUST00000152065,ENSMUST00000152792	adenylate cyclase 3	104111	Adcy3	3.2857
ENSMUSG00000020010	ENSMUST00000020190	vanin 3	26464	Vnn3	3.32932
ENSMUSG00000066682	ENSMUST00000164886,ENSMUST00000196162,ENSMUST00000197411,ENSMUST00000198024,ENSMUST00000199247,ENSMUST00000199773	paired immunoglobin-like type 2 receptor beta 2	545812	Pilrb2	3.33884
ENSMUSG00000020176	ENSMUST00000093321,ENSMUST00000109653,ENSMUST00000109654,ENSMUST00000124587,ENSMUST00000142877,ENSMUST00000143386,ENSMUST00000143915,ENSMUST00000148254,ENSMUST00000150972	growth factor receptor bound protein 10	14783	Grb10	3.36361
ENSMUSG00000055172	ENSMUST00000068593	complement component 1, r subcomponent A	50909	C1ra	3.37172
ENSMUSG00000026399	ENSMUST00000027650,ENSMUST00000122830,ENSMUST00000133057,ENSMUST00000140400,ENSMUST00000140725	CD55 molecule, decay accelerating factor for complement	13136	Cd55	3.37388
ENSMUSG00000027322	ENSMUST00000028794,ENSMUST00000110226,ENSMUST00000110227	sialic acid binding Ig-like lectin 1, sialoadhesin	20612	Siglec1	3.40091
ENSMUSG00000000127	ENSMUST00000000129,ENSMUST00000038080,ENSMUST00000232945,ENSMUST00000233190,ENSMUST00000233225	fer (fms/fps related) protein kinase	14158	Fer	3.40736
ENSMUSG00000035283	ENSMUST00000038949,ENSMUST00000236875	adrenergic receptor, beta 1	11554	Adrb1	3.42736
ENSMUSG00000031722	ENSMUST00000074898,ENSMUST00000212018,ENSMUST00000212918	haptoglobin	15439	Hp	3.43045
ENSMUSG00000035969	ENSMUST00000035645,ENSMUST00000098106,ENSMUST00000123447,ENSMUST00000125393,ENSMUST00000125399,ENSMUST00000131037,ENSMUST00000131668,ENSMUST00000135216,ENSMUST00000136360,ENSMUST00000139198,ENSMUST00000144911,ENSMUST00000146710,ENSMUST00000149221,ENSMUST00000149556,ENSMUST00000150066,ENSMUST00000152322,ENSMUST00000154754,ENSMUST00000173682	RUN and SH3 domain containing 2	100213	Rusc2	3.43279
ENSMUSG00000038026	ENSMUST00000062387,ENSMUST00000194204,ENSMUST00000194860	potassium inwardly-rectifying channel, subfamily J, member 9	16524	Kcnj9	3.43718
ENSMUSG00000101389	ENSMUST00000188995	membrane-spanning 4-domains, subfamily A, member 4A	666907	Ms4a4a	3.45512
ENSMUSG00000013611	ENSMUST00000013755,ENSMUST00000160936,ENSMUST00000161202,ENSMUST00000162888	sorting nexin 31	66696	Snx31	3.49053
ENSMUSG00000020092	ENSMUST00000020289,ENSMUST00000219132,ENSMUST00000219240	phosphatase domain containing, paladin 1	27355	Pald1	3.49438
ENSMUSG00000040522	ENSMUST00000049023,ENSMUST00000112170,ENSMUST00000133722,ENSMUST00000138311,ENSMUST00000148370	toll-like receptor 8	170744	Tlr8	3.49973
ENSMUSG00000004359	ENSMUST00000004473,ENSMUST00000133724,ENSMUST00000138734,ENSMUST00000144338	Spi-C transcription factor (Spi-1/PU.1 related)	20728	Spic	3.50923
ENSMUSG00000025702	ENSMUST00000079012,ENSMUST00000101032,ENSMUST00000123246,ENSMUST00000123405,ENSMUST00000126376,ENSMUST00000127992,ENSMUST00000129170,ENSMUST00000130445,ENSMUST00000135901,ENSMUST00000140884,ENSMUST00000156014,ENSMUST00000203116,ENSMUST00000203193,ENSMUST00000204657,ENSMUST00000204918,ENSMUST00000205066	membrane-associated ring finger (C3HC4) 8	71779	Marchf8	3.51199
ENSMUSG00000030142	ENSMUST00000032239,ENSMUST00000175954,ENSMUST00000175995,ENSMUST00000176096,ENSMUST00000176443,ENSMUST00000176831,ENSMUST00000177367	C-type lectin domain family 4, member e	56619	Clec4e	3.52124
ENSMUSG00000028497	ENSMUST00000030221,ENSMUST00000132493,ENSMUST00000151280	3-hydroxyacyl-CoA dehydratase 4	66775	Hacd4	3.55707
ENSMUSG00000097694	ENSMUST00000180509,ENSMUST00000181884,ENSMUST00000231801	RIKEN cDNA G730013B05 gene	619312	G730013B05Rik	3.56391
ENSMUSG00000031613	ENSMUST00000034026	hydroxyprostaglandin dehydrogenase 15 (NAD)	15446	Hpgd	3.58904
ENSMUSG00000055546	ENSMUST00000068877	T cell immunoglobulin and mucin domain containing 4	276891	Timd4	3.60117
ENSMUSG00000021322	ENSMUST00000021757,ENSMUST00000221982,ENSMUST00000222135,ENSMUST00000223364	acyloxyacyl hydrolase	27052	Aoah	3.60697
ENSMUSG00000042770	ENSMUST00000045855,ENSMUST00000204000,ENSMUST00000204730,ENSMUST00000205232	heme binding protein 1	15199	Hebp1	3.60928
ENSMUSG00000050578	ENSMUST00000015394	matrix metallopeptidase 13	17386	Mmp13	3.63931
ENSMUSG00000040249	ENSMUST00000049149,ENSMUST00000118455,ENSMUST00000121829,ENSMUST00000125480,ENSMUST00000129727,ENSMUST00000129877,ENSMUST00000133620,ENSMUST00000135188,ENSMUST00000140269,ENSMUST00000145947	low density lipoprotein receptor-related protein 1	16971	Lrp1	3.64337
ENSMUSG00000058135	ENSMUST00000004140,ENSMUST00000126593,ENSMUST00000153314,ENSMUST00000198532	glutathione S-transferase, mu 1	14862	Gstm1	3.65819
ENSMUSG00000030144	ENSMUST00000032240,ENSMUST00000203421,ENSMUST00000204826	C-type lectin domain family 4, member d	17474	Clec4d	3.6617
ENSMUSG00000096606	ENSMUST00000178124	trophoblast glycoprotein-like	100503386	Tpbgl	3.67693
ENSMUSG00000029086	ENSMUST00000030973,ENSMUST00000074113,ENSMUST00000087441,ENSMUST00000087442,ENSMUST00000165909,ENSMUST00000171543,ENSMUST00000177946,ENSMUST00000179059,ENSMUST00000195942,ENSMUST00000196178,ENSMUST00000196378,ENSMUST00000196852,ENSMUST00000196853,ENSMUST00000197706,ENSMUST00000197749,ENSMUST00000197750,ENSMUST00000198218,ENSMUST00000198347,ENSMUST00000199739	prominin 1	19126	Prom1	3.68438
ENSMUSG00000030516	ENSMUST00000032729,ENSMUST00000102592,ENSMUST00000132036,ENSMUST00000144961,ENSMUST00000206228,ENSMUST00000206438,ENSMUST00000206612	tight junction protein 1	21872	Tjp1	3.69978
ENSMUSG00000085723	ENSMUST00000147379	predicted gene 15915	100504069	Gm15915	3.70865
ENSMUSG00000002108	ENSMUST00000002177,ENSMUST00000111354,ENSMUST00000111355,ENSMUST00000111356,ENSMUST00000130031,ENSMUST00000133261,ENSMUST00000136234,ENSMUST00000150654	nuclear receptor subfamily 1, group H, member 3	22259	Nr1h3	3.72259
ENSMUSG00000019194	ENSMUST00000098548,ENSMUST00000211923,ENSMUST00000211945	sodium channel, voltage-gated, type I, beta	20266	Scn1b	3.76025
ENSMUSG00000057722	ENSMUST00000037552,ENSMUST00000102777,ENSMUST00000106921,ENSMUST00000128948,ENSMUST00000145024,ENSMUST00000151733,ENSMUST00000156402	leptin receptor	16847	Lepr	3.78716
ENSMUSG00000063611	ENSMUST00000074761,ENSMUST00000238539	predicted gene 10134	NA	Gm10134	3.79793
ENSMUSG00000046245	ENSMUST00000058897,ENSMUST00000110980,ENSMUST00000130460,ENSMUST00000197586,ENSMUST00000199028	paired immunoglobin-like type 2 receptor alpha	231805	Pilra	3.81901
ENSMUSG00000022103	ENSMUST00000022699,ENSMUST00000227633,ENSMUST00000227697	glial cell line derived neurotrophic factor family receptor alpha 2	14586	Gfra2	3.81985
ENSMUSG00000073555	ENSMUST00000031549	predicted gene 4951	240327	Gm4951	3.82248
ENSMUSG00000002289	ENSMUST00000002360,ENSMUST00000173869,ENSMUST00000174858,ENSMUST00000174872	angiopoietin-like 4	57875	Angptl4	3.83668
ENSMUSG00000030402	ENSMUST00000032560,ENSMUST00000205498,ENSMUST00000205792,ENSMUST00000206782	protein phosphatase, Mg2+/Mn2+ dependent, 1N (putative)	232941	Ppm1n	3.83755
ENSMUSG00000089669	ENSMUST00000018896,ENSMUST00000108648	tumor necrosis factor (ligand) superfamily, member 13	69583	Tnfsf13	3.84945
ENSMUSG00000061666	ENSMUST00000020804	glycerophosphodiester phosphodiesterase domain containing 1	66569	Gdpd1	3.86965
ENSMUSG00000025889	ENSMUST00000114268,ENSMUST00000163779,ENSMUST00000203177,ENSMUST00000204586	synuclein, alpha	20617	Snca	3.87232
ENSMUSG00000021779	ENSMUST00000022303,ENSMUST00000022304,ENSMUST00000091471,ENSMUST00000224438,ENSMUST00000224470,ENSMUST00000224597,ENSMUST00000224934	thyroid hormone receptor beta	21834	Thrb	3.91034
ENSMUSG00000024044	ENSMUST00000080208,ENSMUST00000112680,ENSMUST00000223565,ENSMUST00000223610,ENSMUST00000223703,ENSMUST00000223816,ENSMUST00000224523,ENSMUST00000224951,ENSMUST00000225062,ENSMUST00000225209,ENSMUST00000225316,ENSMUST00000225604,ENSMUST00000225695,ENSMUST00000225740,ENSMUST00000225977,ENSMUST00000232706,ENSMUST00000233509,ENSMUST00000233964,ENSMUST00000238898,ENSMUST00000239167	erythrocyte membrane protein band 4.1 like 3	13823	Epb41l3	3.91139
ENSMUSG00000005413	ENSMUST00000005548,ENSMUST00000159631	heme oxygenase 1	15368	Hmox1	3.92108
ENSMUSG00000027200	ENSMUST00000051419,ENSMUST00000076335,ENSMUST00000077847,ENSMUST00000078621,ENSMUST00000103238,ENSMUST00000103239,ENSMUST00000103240,ENSMUST00000103241,ENSMUST00000132088,ENSMUST00000137172,ENSMUST00000151199	sema domain, transmembrane domain (TM), and cytoplasmic domain, (semaphorin) 6D	214968	Sema6d	3.92965
ENSMUSG00000026390	ENSMUST00000027639,ENSMUST00000186432	macrophage receptor with collagenous structure	17167	Marco	3.96357
ENSMUSG00000036862	ENSMUST00000078482,ENSMUST00000140959,ENSMUST00000154659	dachsous cadherin related 1	233651	Dchs1	3.97955
ENSMUSG00000026815	ENSMUST00000028156,ENSMUST00000145690,ENSMUST00000155686,ENSMUST00000164290	growth factor independent 1B	14582	Gfi1b	3.98488
ENSMUSG00000020774	ENSMUST00000021119,ENSMUST00000132774,ENSMUST00000134079,ENSMUST00000141898,ENSMUST00000155630,ENSMUST00000184572	aspartoacylase	11484	Aspa	3.99111
ENSMUSG00000008540	ENSMUST00000008684,ENSMUST00000118091,ENSMUST00000120230,ENSMUST00000120302,ENSMUST00000120939,ENSMUST00000125810,ENSMUST00000140932,ENSMUST00000204628	microsomal glutathione S-transferase 1	56615	Mgst1	4.00769
ENSMUSG00000049580	ENSMUST00000094161,ENSMUST00000164726,ENSMUST00000165257,ENSMUST00000165901,ENSMUST00000167405,ENSMUST00000179780,ENSMUST00000206414,ENSMUST00000206770	tsukushi, small leucine rich proteoglycan	244152	Tsku	4.0261
ENSMUSG00000019647	ENSMUST00000019791,ENSMUST00000076043,ENSMUST00000115449,ENSMUST00000123228,ENSMUST00000126684,ENSMUST00000135790,ENSMUST00000141224,ENSMUST00000144223,ENSMUST00000151382,ENSMUST00000156422	sema domain, transmembrane domain (TM), and cytoplasmic domain, (semaphorin) 6A	20358	Sema6a	4.03598
ENSMUSG00000072949	ENSMUST00000168120,ENSMUST00000220901,ENSMUST00000222591,ENSMUST00000222862	acyl-CoA thioesterase 1	26897	Acot1	4.09292
ENSMUSG00000048022	ENSMUST00000127247	transmembrane protein 229A	319832	Tmem229a	4.0944
ENSMUSG00000025911	ENSMUST00000027044,ENSMUST00000130927,ENSMUST00000144177,ENSMUST00000186467,ENSMUST00000190654	alcohol dehydrogenase, iron containing, 1	76187	Adhfe1	4.11501
ENSMUSG00000023216	ENSMUST00000023987,ENSMUST00000102490,ENSMUST00000124703,ENSMUST00000128360,ENSMUST00000145812,ENSMUST00000147444,ENSMUST00000152217	erythrocyte membrane protein band 4.2	13828	Epb42	4.1156
ENSMUSG00000031078	ENSMUST00000033407,ENSMUST00000103079,ENSMUST00000126018,ENSMUST00000134131,ENSMUST00000148778,ENSMUST00000150607,ENSMUST00000157079	cortactin	13043	Cttn	4.12664
ENSMUSG00000073400	ENSMUST00000060524	tripartite motif-containing 10	19824	Trim10	4.13707
ENSMUSG00000029361	ENSMUST00000086451,ENSMUST00000102557,ENSMUST00000124194,ENSMUST00000138554,ENSMUST00000138579,ENSMUST00000142742,ENSMUST00000171055	nitric oxide synthase 1, neuronal	18125	Nos1	4.14947
ENSMUSG00000055435	ENSMUST00000069009,ENSMUST00000109104	avian musculoaponeurotic fibrosarcoma oncogene homolog	17132	Maf	4.16208
ENSMUSG00000030087	ENSMUST00000032174,ENSMUST00000113530,ENSMUST00000203039,ENSMUST00000203607,ENSMUST00000205136	Kruppel-like factor 15	66277	Klf15	4.19606
ENSMUSG00000031139	ENSMUST00000033478,ENSMUST00000063507,ENSMUST00000101531	mcf.2 transforming sequence	109904	Mcf2	4.33035
ENSMUSG00000012187	ENSMUST00000012331,ENSMUST00000113524,ENSMUST00000125458,ENSMUST00000134947,ENSMUST00000149732,ENSMUST00000152111	monoacylglycerol O-acyltransferase 1	68393	Mogat1	4.35407
ENSMUSG00000031903	ENSMUST00000034377,ENSMUST00000212059,ENSMUST00000212116,ENSMUST00000212963	phospholipase A2, group XV	192654	Pla2g15	4.39703
ENSMUSG00000020604	ENSMUST00000020928,ENSMUST00000106696,ENSMUST00000106697,ENSMUST00000136336,ENSMUST00000152252	arylsulfatase G	74008	Arsg	4.4113
ENSMUSG00000029716	ENSMUST00000031729,ENSMUST00000196375,ENSMUST00000196450,ENSMUST00000196471,ENSMUST00000197705,ENSMUST00000198783,ENSMUST00000198866,ENSMUST00000199054,ENSMUST00000199069,ENSMUST00000199957,ENSMUST00000200190	transferrin receptor 2	50765	Tfr2	4.41208
ENSMUSG00000022371	ENSMUST00000023053,ENSMUST00000110217,ENSMUST00000110221,ENSMUST00000125416	collagen, type XIV, alpha 1	12818	Col14a1	4.41782
ENSMUSG00000059498	ENSMUST00000164044,ENSMUST00000164179,ENSMUST00000168817,ENSMUST00000169017	Fc receptor, IgG, low affinity III	14131	Fcgr3	4.45707
ENSMUSG00000031170	ENSMUST00000033512,ENSMUST00000115590,ENSMUST00000115591,ENSMUST00000127103	solute carrier family 38, member 5	209837	Slc38a5	4.49416
ENSMUSG00000031119	ENSMUST00000033450	glypican 4	14735	Gpc4	4.51438
ENSMUSG00000052131	ENSMUST00000007449	aldo-keto reductase family 1, member B7	11997	Akr1b7	4.54
ENSMUSG00000039115	ENSMUST00000044165,ENSMUST00000124360,ENSMUST00000124422,ENSMUST00000125021,ENSMUST00000149150,ENSMUST00000155437	integrin alpha 9	104099	Itga9	4.58478
ENSMUSG00000022817	ENSMUST00000069345,ENSMUST00000115028,ENSMUST00000134262,ENSMUST00000148462,ENSMUST00000151930,ENSMUST00000231409,ENSMUST00000232262	integrin beta 5	16419	Itgb5	4.60833
ENSMUSG00000052270	ENSMUST00000064068,ENSMUST00000149944	formyl peptide receptor 2	14289	Fpr2	4.6089
ENSMUSG00000060044	ENSMUST00000080995,ENSMUST00000218918,ENSMUST00000219392	transmembrane protein 26	327766	Tmem26	4.61784
ENSMUSG00000025855	ENSMUST00000026973,ENSMUST00000110889,ENSMUST00000110890,ENSMUST00000129851,ENSMUST00000130180,ENSMUST00000134762,ENSMUST00000139415,ENSMUST00000141985,ENSMUST00000147505,ENSMUST00000148002,ENSMUST00000155833	protein kinase, cAMP dependent regulatory, type I beta	19085	Prkar1b	4.6599
ENSMUSG00000037336	ENSMUST00000045921,ENSMUST00000085790,ENSMUST00000125344,ENSMUST00000137337,ENSMUST00000143446,ENSMUST00000147241,ENSMUST00000150764,ENSMUST00000153676	major facilitator superfamily domain containing 2B	432628	Mfsd2b	4.67784
ENSMUSG00000024730	ENSMUST00000025636,ENSMUST00000187859	membrane-spanning 4-domains, subfamily A, member 8A	64381	Ms4a8a	4.75358
ENSMUSG00000044708	ENSMUST00000056136	potassium inwardly-rectifying channel, subfamily J, member 10	16513	Kcnj10	4.78753
ENSMUSG00000020773	ENSMUST00000021120,ENSMUST00000106441,ENSMUST00000127235,ENSMUST00000133039,ENSMUST00000134691,ENSMUST00000141531,ENSMUST00000149957	tripartite motif-containing 47	217333	Trim47	4.81746
ENSMUSG00000025876	ENSMUST00000026994,ENSMUST00000109994,ENSMUST00000136852,ENSMUST00000137967,ENSMUST00000142906	unc-5 netrin receptor A	107448	Unc5a	4.82171
ENSMUSG00000074622	ENSMUST00000099126	v-maf musculoaponeurotic fibrosarcoma oncogene family, protein B (avian)	16658	Mafb	4.88502
ENSMUSG00000035459	ENSMUST00000035288,ENSMUST00000218366,ENSMUST00000218408,ENSMUST00000219280,ENSMUST00000219341,ENSMUST00000219612,ENSMUST00000219659	stabilin 2	192188	Stab2	4.92651
ENSMUSG00000032890	ENSMUST00000071093,ENSMUST00000106283,ENSMUST00000132895,ENSMUST00000171363	regulating synaptic membrane exocytosis 3	242662	Rims3	4.93243
ENSMUSG00000003363	ENSMUST00000117095,ENSMUST00000117611,ENSMUST00000127240,ENSMUST00000131106,ENSMUST00000142981,ENSMUST00000143903,ENSMUST00000150964,ENSMUST00000155287	phospholipase D family, member 3	18807	Pld3	4.97393
ENSMUSG00000032348	ENSMUST00000034903,ENSMUST00000213215	glutathione S-transferase, alpha 4	14860	Gsta4	4.98004
ENSMUSG00000073418	ENSMUST00000069507,ENSMUST00000173057,ENSMUST00000173669	complement component 4B (Chido blood group)	12268	C4b	5.03605
ENSMUSG00000015243	ENSMUST00000030010,ENSMUST00000149127	ATP-binding cassette, sub-family A (ABC1), member 1	11303	Abca1	5.0558
ENSMUSG00000028019	ENSMUST00000029652,ENSMUST00000129285,ENSMUST00000143721	platelet-derived growth factor, C polypeptide	54635	Pdgfc	5.13257
ENSMUSG00000052942	ENSMUST00000065113,ENSMUST00000112612,ENSMUST00000159178,ENSMUST00000159520,ENSMUST00000159639,ENSMUST00000160376,ENSMUST00000161026,ENSMUST00000161328,ENSMUST00000162022,ENSMUST00000162873	GLIS family zinc finger 3	226075	Glis3	5.18762
ENSMUSG00000057286	ENSMUST00000079545,ENSMUST00000123236,ENSMUST00000129236,ENSMUST00000135771,ENSMUST00000145441	ST6 (alpha-N-acetyl-neuraminyl-2,3-beta-galactosyl-1,3)-N-acetylgalactosaminide alpha-2,6-sialyltransferase 2	20446	St6galnac2	5.18827
ENSMUSG00000062312	ENSMUST00000058295,ENSMUST00000136032,ENSMUST00000138066	erb-b2 receptor tyrosine kinase 2	13866	Erbb2	5.19019
ENSMUSG00000036641	ENSMUST00000077687,ENSMUST00000131959,ENSMUST00000134708,ENSMUST00000226455	coiled-coil domain containing 148	227933	Ccdc148	5.2201
ENSMUSG00000025993	ENSMUST00000027137,ENSMUST00000186755,ENSMUST00000186804,ENSMUST00000186822,ENSMUST00000187406,ENSMUST00000187420,ENSMUST00000188252,ENSMUST00000191247	solute carrier family 40 (iron-regulated transporter), member 1	53945	Slc40a1	5.24212
ENSMUSG00000047878	ENSMUST00000049530,ENSMUST00000164614,ENSMUST00000229454,ENSMUST00000229687	alpha 1,4-galactosyltransferase	239559	A4galt	5.26188
ENSMUSG00000004655	ENSMUST00000004774	aquaporin 1	11826	Aqp1	5.26232
ENSMUSG00000015568	ENSMUST00000015712,ENSMUST00000101463,ENSMUST00000168401,ENSMUST00000169749,ENSMUST00000213071	lipoprotein lipase	16956	Lpl	5.27532
ENSMUSG00000027962	ENSMUST00000029574,ENSMUST00000196309,ENSMUST00000196449,ENSMUST00000197031	vascular cell adhesion molecule 1	22329	Vcam1	5.3123
ENSMUSG00000022218	ENSMUST00000002389,ENSMUST00000168729,ENSMUST00000178034,ENSMUST00000226907,ENSMUST00000227958,ENSMUST00000228123	transglutaminase 1, K polypeptide	21816	Tgm1	5.3708
ENSMUSG00000036585	ENSMUST00000040647,ENSMUST00000115582,ENSMUST00000117566,ENSMUST00000131348,ENSMUST00000134864,ENSMUST00000139972,ENSMUST00000147607,ENSMUST00000235922,ENSMUST00000236060,ENSMUST00000236630,ENSMUST00000237356	fibroblast growth factor 1	14164	Fgf1	5.38218
ENSMUSG00000045404	ENSMUST00000049788,ENSMUST00000160413,ENSMUST00000162221,ENSMUST00000177549	potassium channel, subfamily K, member 13	217826	Kcnk13	5.38496
ENSMUSG00000037031	ENSMUST00000047883,ENSMUST00000218394,ENSMUST00000218824,ENSMUST00000219106,ENSMUST00000220143	tetraspanin 15	70423	Tspan15	5.48275
ENSMUSG00000040722	ENSMUST00000046587,ENSMUST00000213771,ENSMUST00000214256,ENSMUST00000215059,ENSMUST00000215208,ENSMUST00000215734	secretory carrier membrane protein 5	56807	Scamp5	5.49898
ENSMUSG00000026141	ENSMUST00000051344,ENSMUST00000115244,ENSMUST00000144297	collagen, type XIX, alpha 1	12823	Col19a1	5.53476
ENSMUSG00000036887	ENSMUST00000046285	complement component 1, q subcomponent, alpha polypeptide	12259	C1qa	5.53602
ENSMUSG00000023349	ENSMUST00000024118,ENSMUST00000112554,ENSMUST00000117130,ENSMUST00000144840,ENSMUST00000151714,ENSMUST00000205129	C-type lectin domain family 4, member n	56620	Clec4n	5.63681
ENSMUSG00000006235	ENSMUST00000006397,ENSMUST00000213181	erythropoietin receptor	13857	Epor	5.67046
ENSMUSG00000036905	ENSMUST00000046384	complement component 1, q subcomponent, beta polypeptide	12260	C1qb	5.71777
ENSMUSG00000051839	ENSMUST00000063359	glycophorin A	14934	Gypa	5.72756
ENSMUSG00000022235	ENSMUST00000070918,ENSMUST00000161088,ENSMUST00000162532,ENSMUST00000226951	carboxymethylenebutenolidase-like (Pseudomonas)	69574	Cmbl	5.73482
ENSMUSG00000006356	ENSMUST00000084882,ENSMUST00000196015,ENSMUST00000197396,ENSMUST00000199976,ENSMUST00000200177,ENSMUST00000200380	cysteine rich protein 2	68337	Crip2	5.84292
ENSMUSG00000031162	ENSMUST00000033502,ENSMUST00000125418,ENSMUST00000128449	GATA binding protein 1	14460	Gata1	5.90108
ENSMUSG00000032261	ENSMUST00000113215,ENSMUST00000185664,ENSMUST00000188030,ENSMUST00000188241,ENSMUST00000188617	SH3 domain binding glutamic acid-rich protein like 2	212531	Sh3bgrl2	5.90435
ENSMUSG00000028517	ENSMUST00000064139	phospholipid phosphatase 3	67916	Plpp3	5.93003
ENSMUSG00000020053	ENSMUST00000062862,ENSMUST00000095360,ENSMUST00000105300,ENSMUST00000121161,ENSMUST00000121952,ENSMUST00000122100,ENSMUST00000122386,ENSMUST00000126490	insulin-like growth factor 1	16000	Igf1	5.93092
ENSMUSG00000040724	ENSMUST00000038695,ENSMUST00000196403,ENSMUST00000197470	potassium voltage-gated channel, shaker-related subfamily, member 2	16490	Kcna2	6.01354
ENSMUSG00000046321	ENSMUST00000084628,ENSMUST00000206880	heparan sulfate (glucosamine) 3-O-sulfotransferase 2	195646	Hs3st2	6.04621
ENSMUSG00000030409	ENSMUST00000032568,ENSMUST00000108473,ENSMUST00000108474,ENSMUST00000122999,ENSMUST00000126264,ENSMUST00000128422,ENSMUST00000132115,ENSMUST00000135839,ENSMUST00000137219,ENSMUST00000140742,ENSMUST00000142725,ENSMUST00000143938,ENSMUST00000147215,ENSMUST00000148380,ENSMUST00000148472,ENSMUST00000149188,ENSMUST00000152050,ENSMUST00000154199,ENSMUST00000238982	dystrophia myotonica-protein kinase	13400	Dmpk	6.05187
ENSMUSG00000027556	ENSMUST00000094365,ENSMUST00000144327,ENSMUST00000181860	carbonic anhydrase 1	12346	Car1	6.08095
ENSMUSG00000036896	ENSMUST00000046332,ENSMUST00000153104	complement component 1, q subcomponent, C chain	12262	C1qc	6.11077
ENSMUSG00000050777	ENSMUST00000056089	transmembrane protein 37	170706	Tmem37	6.12277
ENSMUSG00000014361	ENSMUST00000014505,ENSMUST00000140221	MER proto-oncogene tyrosine kinase	17289	Mertk	6.14456
ENSMUSG00000024371	ENSMUST00000025230,ENSMUST00000127795,ENSMUST00000130728,ENSMUST00000134300,ENSMUST00000148431,ENSMUST00000152417,ENSMUST00000174279,ENSMUST00000174880	complement component 2 (within H-2S)	12263	C2	6.26562
ENSMUSG00000020865	ENSMUST00000021231,ENSMUST00000126566,ENSMUST00000140985,ENSMUST00000151124,ENSMUST00000155253,ENSMUST00000178136	ATP-binding cassette, sub-family C (CFTR/MRP), member 3	76408	Abcc3	6.39448
ENSMUSG00000005360	ENSMUST00000005493,ENSMUST00000125997,ENSMUST00000126747,ENSMUST00000128879,ENSMUST00000129325,ENSMUST00000133309,ENSMUST00000153455,ENSMUST00000157065	solute carrier family 1 (glial high affinity glutamate transporter), member 3	20512	Slc1a3	6.41816
ENSMUSG00000039956	ENSMUST00000038197,ENSMUST00000125429,ENSMUST00000133973,ENSMUST00000138984	melanocortin 2 receptor accessory protein	77037	Mrap	6.41871
ENSMUSG00000047250	ENSMUST00000062069,ENSMUST00000133777,ENSMUST00000144319,ENSMUST00000149930,ENSMUST00000151351	prostaglandin-endoperoxide synthase 1	19224	Ptgs1	6.51513
ENSMUSG00000002602	ENSMUST00000002677,ENSMUST00000085948,ENSMUST00000124442,ENSMUST00000132038,ENSMUST00000132989,ENSMUST00000137211,ENSMUST00000137383,ENSMUST00000147680	AXL receptor tyrosine kinase	26362	Axl	6.60678
ENSMUSG00000054191	ENSMUST00000067060,ENSMUST00000239392	Kruppel-like factor 1 (erythroid)	16596	Klf1	6.61548
ENSMUSG00000026938	ENSMUST00000028307,ENSMUST00000142371	ficolin A	14133	Fcna	6.7631
ENSMUSG00000023019	ENSMUST00000023760,ENSMUST00000161768,ENSMUST00000162194	glycerol-3-phosphate dehydrogenase 1 (soluble)	14555	Gpd1	6.88317
ENSMUSG00000033788	ENSMUST00000081904,ENSMUST00000089595,ENSMUST00000113818,ENSMUST00000113821,ENSMUST00000113823,ENSMUST00000127459,ENSMUST00000128965,ENSMUST00000142711,ENSMUST00000152646,ENSMUST00000153860,ENSMUST00000168387,ENSMUST00000203695,ENSMUST00000203803,ENSMUST00000204354,ENSMUST00000204591,ENSMUST00000204987	dysferlin	26903	Dysf	6.89516
ENSMUSG00000035186	ENSMUST00000038844	ubiquitin D	24108	Ubd	7.11317
ENSMUSG00000070369	ENSMUST00000033051,ENSMUST00000106237,ENSMUST00000176249,ENSMUST00000177111,ENSMUST00000177383	integrin, alpha D	381924	Itgad	7.15711
ENSMUSG00000076534	ENSMUST00000103335,ENSMUST00000199143	immunoglobulin kappa chain variable 12-89	NA	Igkv12-89	7.22414
ENSMUSG00000015947	ENSMUST00000029748,ENSMUST00000200420	Fc receptor, IgG, high affinity I	14129	Fcgr1	7.28945
ENSMUSG00000050666	ENSMUST00000053175	V-set and transmembrane domain containing 4	320736	Vstm4	7.31242
ENSMUSG00000033278	ENSMUST00000037974,ENSMUST00000223982,ENSMUST00000224091,ENSMUST00000224862,ENSMUST00000225074,ENSMUST00000225554,ENSMUST00000225688	protein tyrosine phosphatase, receptor type, M	19274	Ptprm	7.82693
ENSMUSG00000035448	ENSMUST00000039171	chemokine (C-C motif) receptor 3	12771	Ccr3	7.83088
ENSMUSG00000030737	ENSMUST00000032985,ENSMUST00000107086,ENSMUST00000107088,ENSMUST00000137914,ENSMUST00000145381,ENSMUST00000154295,ENSMUST00000207090,ENSMUST00000208225,ENSMUST00000208713	solute carrier organic anion transporter family, member 2b1	101488	Slco2b1	8.25803
ENSMUSG00000026712	ENSMUST00000028045,ENSMUST00000146168	mannose receptor, C type 1	17533	Mrc1	8.51593
ENSMUSG00000026435	ENSMUST00000027695,ENSMUST00000177943,ENSMUST00000185387,ENSMUST00000190322	solute carrier family 45, member 3	212980	Slc45a3	8.53083
ENSMUSG00000022181	ENSMUST00000022788,ENSMUST00000161997,ENSMUST00000162350,ENSMUST00000162585,ENSMUST00000162729	complement component 6	12274	C6	8.56663
ENSMUSG00000015354	ENSMUST00000015498,ENSMUST00000151210	procollagen C-endopeptidase enhancer 2	76477	Pcolce2	8.65148
ENSMUSG00000045551	ENSMUST00000061516	formyl peptide receptor 1	14293	Fpr1	8.77629
ENSMUSG00000064225	ENSMUST00000079597	progestin and adipoQ receptor family member IX	75552	Paqr9	8.78691
ENSMUSG00000025270	ENSMUST00000066337,ENSMUST00000112715,ENSMUST00000134670,ENSMUST00000142474	aminolevulinic acid synthase 2, erythroid	11656	Alas2	8.80085
ENSMUSG00000037762	ENSMUST00000046807,ENSMUST00000155933	solute carrier family 16 (monocarboxylic acid transporters), member 9	66859	Slc16a9	8.9842
ENSMUSG00000069917	ENSMUST00000093207,ENSMUST00000147010	hemoglobin alpha, adult chain 2	110257	Hba-a2	9.00796
ENSMUSG00000069919	ENSMUST00000093209,ENSMUST00000142555	hemoglobin alpha, adult chain 1	15122	Hba-a1	9.06813
ENSMUSG00000044206	ENSMUST00000050707,ENSMUST00000146830	V-set and immunoglobulin domain containing 4	278180	Vsig4	9.43795
ENSMUSG00000015854	ENSMUST00000015998	CD5 antigen-like	11801	Cd5l	10.3575
ENSMUSG00000023031	ENSMUST00000023775,ENSMUST00000229235,ENSMUST00000229869,ENSMUST00000229888,ENSMUST00000230312,ENSMUST00000230572,ENSMUST00000230642,ENSMUST00000230740,ENSMUST00000230744	chymotrypsin-like elastase family, member 1	109901	Cela1	10.6386
ENSMUSG00000073940	ENSMUST00000098192	hemoglobin, beta adult t chain	101488143	Hbb-bt	10.7991
ENSMUSG00000006574	ENSMUST00000006749,ENSMUST00000128405,ENSMUST00000145636,ENSMUST00000149993,ENSMUST00000151050	solute carrier family 4 (anion exchanger), member 1	20533	Slc4a1	10.8342
ENSMUSG00000008845	ENSMUST00000032234,ENSMUST00000112541,ENSMUST00000203210	CD163 antigen	93671	Cd163	10.8793
ENSMUSG00000052305	ENSMUST00000023934,ENSMUST00000131960,ENSMUST00000153218	hemoglobin, beta adult s chain	15129	Hbb-bs	10.8924
ENSMUSG00000040564	ENSMUST00000045035,ENSMUST00000108451,ENSMUST00000207500,ENSMUST00000207978	apolipoprotein C-I	11812	Apoc1	15.5865
