# Supplementary material for: Dietary Polyunsaturated Fatty Acids Regulate Dendritic Cell Function via Nrf2-dependent Control of Ferroptosis
Source: Research Square preprint supplement (doi:10.21203/rs.3.rs-7983397/v1), 2025-11-19
Supplement: Supplementary file 3 [file dfed4db644ce0062f6d6002e.xlsx]

## Sheet: Bone marrow cells
	Bone marrow cells
		n-6		n-3
	Fatty acid	Average μg/5x105 cells (n=5/group)	STDEV	Average μg/5x105 cells (n=5/group)	STDEV	p-value
	Dodecanoic acid	0.305592	0.0575049	0.299311	0.07957	0.889777
	Myristic acid	1.7856	0.609849	1.48785	0.227242	0.336245
	Pentadecanoic acid	1.74315	0.882305	1.46484	0.409584	0.54022
	Palmitoleic acid	4.85434	2.28185	4.64634	1.57903	0.871053
	Sapienic acid	3.43604	1.67223	3.19805	1.17244	0.801005
	Palmitic acid	2.00694	0.916451	2.46982	1.11803	0.494379
	Heptadecenoic acid	0.859494	0.368984	0.796911	0.350519	0.790308
	Heptadecanoic acid	0.208311	0.0154722	0.218833	0.0176685	0.345779
	Octadecatetraenoic acid (Stearidonic acid)	0.00015766	0.000352539	0	0	0.346594
	Linolenic acid (alpha)	0.00339128	0.00106318	0.00240095	0.000672412	0.116388
	Linolenic acid (gamma)	0.00339128	0.00106318	0.00240095	0.000672412	0.116388
	Linoleic acid	0.606613	0.152201	0.425152	0.0694504	0.0415001
	Oleic acid	9.9562	2.13114	9.85836	1.41167	0.933898
	Stearic acid	1.86692	0.516725	2.10872	0.620403	0.521939
	Eicosapentaenoic acid	0.000723266	0.000529783	0.179984	0.0300599	9.57288e-07
	Arachidonic acid	0.686224	0.284987	0.544608	0.219793	0.404584
	Dihomo-g-linolenic acid	0.00463261	0.0013288	0.00515618	0.0033564	0.754018
	Mead acid	0.00169386	0.00110449	0.00204905	0.001265	0.648887
	Eicosadienoic acid	0.0407822	0.00980476	0.0246523	0.00788376	0.0209323
	Eicosenoic acid	0.898887	0.473998	0.694307	0.347537	0.458785
	Arachidic acid	0.175113	0.074959	0.140269	0.0709589	0.471984
	Docosahexaenoic acid	0.0252268	0.00846643	0.2269	0.0822766	0.000607138
	Docosapentaenoic acid (n-3)	0.0255065	0.00635204	0.0551505	0.0207427	0.0156878
	Docosapentaenoic acid (n-6)	0.0223887	0.00717054	0.0246981	0.0104966	0.695227
	Docosatetraenoic acid	0.00949181	0.00329341	0.00202874	0.000922821	0.00122567
	Docosatrienoic acid	0.0610126	0.0462661	0.0395476	0.0123849	0.345624
	Docosadienoic acid	0.0371679	0.0424507	0.0176682	0.0045471	0.337003
	Docosenoic acid	6.00544	3.93823	4.24263	2.70229	0.433122
	Docosanoic acid (Behenic acid)	0.451974	0.310371	0.589939	0.414955	0.568068
	Nervonic acid	0.142006	0.0965519	0.205307	0.183199	0.51359
	Lignoceric acid	0.467578	0.271816	0.707781	0.590032	0.432322
	Hexacosenoic acid	0.0387135	0.0245282	0.057793	0.0465717	0.44108
	Hexacosanoic acid	0.314313	0.189508	0.511	0.446819	0.391323

## Sheet: spDC
	Splenic DCs (spDCs)
		n-6		n-3
	Fatty acid	Average μg/5x105 cells (n=5/group)	STDEV	Average μg/5x105 cells (n=5/group)	STDEV	p-value
	Dodecanoic acid	0.153021	0.0415295	0.286581	0.116347	0.0420147
	Myristic acid	1.62783	0.17762	1.35769	0.244331	0.08056
	Pentadecanoic acid	1.19476	0.228526	1.10716	0.172689	0.513375
	Palmitoleic acid	2.37022	3.06815	3.26356	1.69584	0.584441
	Sapienic acid	1.72161	2.27323	2.23475	1.1551	0.66466
	Palmitic acid	1.85949	1.13943	2.10904	0.894295	0.710094
	Heptadecenoic acid	0.482681	0.52575	0.655236	0.382854	0.569393
	Heptadecanoic acid	0.18465	0.0130795	0.202364	0.0276823	0.231861
	Octadecatetraenoic acid (Stearidonic acid)	0.000139627	0.000312215	0	0	0.346594
	Linolenic acid (alpha)	0.00207034	0.000726443	0.00161493	0.00118663	0.485111
	Linolenic acid (gamma)	0.00207034	0.000726443	0.00161493	0.00118663	0.485111
	Linoleic acid	0.19693	0.0310375	0.305201	0.0863981	0.029845
	Oleic acid	7.51648	2.04752	11.724	3.36157	0.043835
	Stearic acid	1.75456	0.553146	1.96788	0.451853	0.523018
	Eicosapentaenoic acid	0.000191168	0.000130262	0.0739326	0.0622469	0.0523302
	Arachidonic acid	0.153	0.0497487	0.219788	0.0320689	0.0540568
	Dihomo-g-linolenic acid	0.000830004	0.000402308	0.00157523	0.00080232	0.10045
	Mead acid	0.000758907	0.000614803	0.00130961	0.0013682	0.435453
	Eicosadienoic acid	0.0137299	0.00589089	0.0169994	0.0100896	0.548911
	Eicosenoic acid	1.13527	0.458229	1.03106	0.381532	0.706158
	Arachidic acid	0.156757	0.0478756	0.158166	0.0482919	0.964188
	Docosahexaenoic acid	0.0104525	0.00286292	0.108984	0.0858956	0.0334593
	Docosapentaenoic acid (n-3)	0.0090442	0.00307508	0.0372564	0.0221251	0.0223519
	Docosapentaenoic acid (n-6)	0.00581448	0.00451323	0.0175582	0.0103868	0.0490159
	Docosatetraenoic acid	0.00637662	0.00170385	0.00215116	0.00120474	0.00192988
	Docosatrienoic acid	0.0243584	0.0151867	0.0285731	0.00923002	0.610301
	Docosadienoic acid	0.0150656	0.00464687	0.0211759	0.00975262	0.241567
	Docosenoic acid	6.56193	3.25645	6.43263	3.32819	0.95201
	Docosanoic acid (Behenic acid)	0.837054	0.452966	0.807927	0.444374	0.920774
	Nervonic acid	0.371129	0.19188	0.268474	0.144675	0.367447
	Lignoceric acid	0.830093	0.446607	0.784202	0.427158	0.872242
	Hexacosenoic acid	0.095432	0.0422188	0.0726198	0.0374097	0.392258
	Hexacosanoic acid	0.541686	0.383419	0.533325	0.279933	0.969551

## Sheet: Serum
	Serum
		n-6		n-3
	Fatty acid	Average μg/ml (n=8/group)	STDEV	Average μg/ml (n=8/group)	STDEV	p-value
	Dodecanoic acid	1.00212	0.587586	1.53246	0.666891	0.113619
	Myristic acid	3.6626	0.75488	9.28611	3.32013	0.000360127
	Pentadecanoic acid	1.56215	0.458103	3.83603	3.74489	0.11033
	Palmitoleic acid	19.505	4.64215	30.2804	12.5666	0.039161
	Palmitic acid	46.8004	12.3723	38.3826	7.96649	0.127965
	Heptadecenoic acid	1.44542	0.551488	2.74515	2.96797	0.243436
	Heptadecanoic acid	1.10311	0.351767	1.91108	0.818849	0.0224869
	Octadecatetraenoic acid (Stearidonic acid)	0	0	0.32231	0.0944926	1.45406e-07
	Linolenic acid (gamma)	0.056226	0.0282527	0.0214031	0.0300287	0.0315329
	Linolenic acid (alpha)	0.0438794	0.0315509	0.0259344	0.0301058	0.26393
	Linoleic acid	19.1018	4.15942	2.40673	0.532703	2.10616e-08
	Oleic acid	182.675	43.8203	74.6897	21.4222	2.08494e-05
	Stearic acid	38.4122	12.2154	32.928	5.98048	0.273219
	Eicosapentaenoic acid	0.118239	0.0347687	28.6722	1.71664	8.16265e-17
	Arachidonic acid	20.8921	5.50612	5.61865	0.933368	2.02116e-06
	Dihomo-g-linolenic acid	0.145716	0.053634	0.0181588	0.0251211	2.78151e-05
	Mead acid	0.0973931	0.057404	0	0	0.00028321
	Eicosadienoic acid	0.242691	0.0621332	0.0876136	0.0378062	3.08739e-05
	Eicosenoic acid	4.73234	1.09205	3.2314	1.46404	0.0356651
	Arachidic acid	0.279384	0.0539399	0.335217	0.228898	0.512822
	Docosahexaenoic acid	11.6773	2.68522	32.4575	4.7519	3.70594e-08
	Docosapentaenoic acid (n-3)	0.156685	0.0398542	0.409239	0.104575	1.70215e-05
	Docosapentaenoic acid (n-6)	3.71006	1.48915	0.293315	0.146373	1.50135e-05
	Docosatetraenoic acid	0.100563	0.0320659	0	0	4.03538e-07
	Docosatrienoic acid	0.0149076	0.00784686	0.00361392	0.00320452	0.00207521
	Docosadienoic acid	0.0027982	0.00178585	0.0047181	0.00588191	0.391937
	Docosenoic acid	0.0473768	0.0294069	0.101349	0.0716398	0.0687896
	Docosanoic acid (Behenic acid)	0.0849218	0.0561982	0.209954	0.217773	0.138178
	Nervonic acid	0.0318115	0.0125049	0.0728197	0.0549725	0.0587766
	Lignoceric acid	0.286138	0.0969589	0.455321	0.636545	0.469663
	Hexacosenoic acid	0.0063219	0.002575	0.0137395	0.0285898	0.476913
	Hexacosanoic acid	0.0543452	0.0492909	0.164792	0.305255	0.329501

## Sheet: Omentum
	Omentum
		n-6		n-3
	Fatty acid	Average mg/g tissue wet weight (n = 8 / group)	STDEV	Average mg/g tissue wet weight (n = 8 / group)	STDEV	p-value
	Dodecanoic acid	0.101256	0.0714385	0.154546	0.139145	0.351568
	Myristic acid	1.84527	1.10887	1.45599	0.608996	0.398801
	Pentadecanoic acid	0.211213	0.101491	0.239182	0.0775149	0.545573
	Palmitoleic acid	24.0524	18.2584	12.3192	6.73397	0.110215
	Palmitic acid	5.70812	2.64603	3.95801	1.09829	0.106002
	Heptadecenoic acid	0.599594	0.457217	0.388321	0.21463	0.25647
	Heptadecanoic acid	0.083452	0.0413284	0.0839874	0.0241121	0.975198
	Octadecatetraenoic acid (Stearidonic acid)	0.00028968	0.000490821	0.0149415	0.00791158	0.000127861
	Linolenic acid (gamma)	0.00517863	0.00417887	0.00373488	0.00251247	0.416394
	Linolenic acid (alpha)	0.00502064	0.00425741	0.00376932	0.00184665	0.458322
	Linoleic acid	2.14645	1.41561	0.272576	0.184099	0.00231792
	Oleic acid	64.7881	35.8871	28.5851	11.1173	0.0164141
	Stearic acid	1.95981	1.0408	1.35278	0.534192	0.164314
	Eicosapentaenoic acid	0.00351045	0.00225899	0.221238	0.134934	0.000427243
	Arachidonic acid	0.186923	0.133974	0.0525224	0.0262969	0.0146251
	Dihomo-g-linolenic acid	0.000773507	0.00124994	0.000100317	0.000283738	0.15957
	Mead acid	0.0027757	0.00283185	0	0	0.0149729
	Eicosadienoic acid	0.0487631	0.0385941	0.0129636	0.00719195	0.0218424
	Eicosenoic acid	2.42637	1.98111	0.814369	0.458306	0.041659
	Arachidic acid	0.0607203	0.0408724	0.0296263	0.0104076	0.0558391
	Docosahexaenoic acid	0.0884701	0.0732201	0.642323	0.321026	0.000306043
	Docosapentaenoic acid (n-3)	7.69489e-05	0.000217644	0.00590876	0.00433751	0.0019583
	Docosapentaenoic acid (n-6)	0.0847949	0.0674327	0.0251536	0.0119939	0.0273526
	Docosatetraenoic acid	0.0119939	0.00937695	0.00160147	0.00113489	0.00764729
	Docosatrienoic acid	0.00283623	0.00213719	0.001028	0.000461568	0.0346729
	Docosadienoic acid	0.00124391	0.00113256	0.000778821	0.000401863	0.292151
	Docosenoic acid	0.0207683	0.0109046	0.0136339	0.00402788	0.10453
	Docosanoic acid (Behenic acid)	0.0169076	0.00986305	0.0122087	0.00545847	0.258057
	Nervonic acid	0.0134918	0.00892362	0.0113378	0.0038339	0.540562
	Lignoceric acid	0.0248792	0.0164822	0.0203385	0.0125847	0.545653
	Hexacosenoic acid	0.000722689	0.000694779	0.000502348	0.000259794	0.414922
	Hexacosanoic acid	0.00971848	0.00900852	0.0085294	0.00653153	0.766903
