# Supplementary material for: Dietary Polyunsaturated Fatty Acids Regulate Dendritic Cell Function via Nrf2-dependent Control of Ferroptosis
Source: Research Square preprint supplement (doi:10.21203/rs.3.rs-7983397/v1), 2025-11-19
Supplement: Supplementary file 4 [file ea55820e616b5e704b59d5a1.docx]

| **Supplemental Table 1**  Diets composition | **n-6** | | **n-3** | |
| --- | --- | --- | --- | --- |
| **Research Diets catalog number:** | D18062204 | | D12041401 | |
|  | **gm%** | **kcal%** | **gm%** | **kcal%** |
| Protein | 20 | 20 | 20 | 20 |
| Carbohydrate | 64 | 64 | 64 | 64 |
| Fat | 7 | 16 | 7 | 16 |
| Total |  | 100 |  | 100 |
| kcal/gm | 4 |  | 4 |  |
|  |  |  |  |  |
| **Ingredient** | **gm** | **kcal** | **gm** | **kcal** |
| Casein | 200 | 800 | 200 | 800 |
| L-Cystine | 3 | 12 | 3 | 12 |
|  |  |  |  |  |
| Corn Starch | 397.486 | 1590 | 397.486 | 1590 |
| Maltodextrin 10 | 132 | 528 | 132 | 528 |
| Sucrose | 100 | 400 | 100 | 400 |
|  |  |  |  |  |
| Cellulose, BW200 | 50 | 0 | 50 | 0 |
|  |  |  |  |  |
| Corn oil | 70 | 630 | 0 | 0 |
| Menhaden oil (with 200 ppm tBHQ) | 0 | 0 | 70 | 630 |
| t-Butylhydroquinone (tBHQ)* | 0.014 | 0 | 0 | 0 |
|  |  |  |  |  |
| Mineral Mix S10022G | 35 | 0 | 35 | 0 |
|  |  |  |  |  |
| Vitamin Mix V10037 | 10 | 40 | 10 | 40 |
| Choline Bitartrate | 2.5 | 0 | 2.5 | 0 |
|  |  |  |  |  |
| Cholesterol, NF** | 0.41 | 0 | 0 | 0 |
| **Total** | 1000.41 | 4000 | 999.986 | 4000 |

*Menhaden oil contains 200 ppm t-BHQ. Thus, to match t-BHQ levels across diets, this antioxidant was added at the same amount to the corn oil-based diet.

**Menhaden oil also contains 588 mg cholesterol/100 g oil. To match cholesterol levels, additional cholesterol was added to the corn oil (n-6) based diet.
